# Supplementary material for: Patient hesitancy in perioperative clinical trial enrollment during the COVID-19 pandemic
Source: PLoS One. 2023 Jan 17;18(1):e0279643. doi: 10.1371/journal.pone.0279643 (PMC9844839; doi:10.1371/journal.pone.0279643)
Supplement: S2 Data — (XLSX) [file pone.0279643.s003.xlsx]

## Sheet: Pre-COVID Non-Approaches
PreScreen Subject #	Subject Study Number	Age	Sex	Ethnicity	Race	Met Eligibility Criteria (Y/N)	Reason for Exclusion/Screen Failure	Didn’t Approach: 1 - Ineligible, 2 - Approached by conflicting study, 3 - Other (left before could approach, PPE canceled, Surgery canceled, unable to approach due to corornavirus shutdown/covid exposure)	Said No: 1- No to participation (including when called for baseline), 2 - No to discussion, 3 - Other (maybe but unreachable, maybe but surgery canceled)	Said Yes: 1 - Participated, 2 - Yes and completed baseline but declined before or on DOS, 3 - Other (unrandomized, did not book open heart surgery at MGH, unreachable to complete baseline, coronavirus shutdown/covid exposure, surgery canceled after recruitment, enrolled in conflicting study, died before surgery)	Reason for Decline
PS_052	n/a	73	M	N	Black	Y	Patient approached by conflicting study.	2	0	0					Not approached due to study overlap
PS_068	n/a	65	M	N	White	Y	Patient approached by conflicting study.	2	0	0
PS_076	n/a	71	M	N	White	Y	Patient approached by conflicting study.	2	0	0
PS_093	n/a	77	F	N	White	Y	Patient approached by conflicting study.	2	0	0
PS_107	n/a	74	M	N	White	Y	Patient approached by conflicting study.	2	0	0
PS_109	n/a	65	M	N	White	Y	Patient approached by conflicting study.	2	0	0
PS_111	n/a	73	M	N	White	Y	Patient approached by conflicting study.	2	0	0
PS_115	n/a	72	M	N	White	Y	Patient approached by conflicting study.	2	0	0
PS_117	n/a	77	F	N	White	Y- need to check Xanax use	Patient approached by conflicting study.	2	0	0
PS_124	n/a	73	F	N	White	Y- need to check CPAP	Patient approached by conflicting study.	2	0	0
PS_138	n/a	72	F	N	White	Y	Patient approached by conflicting study.	2	0	0
PS_142	n/a	64	M	N	White	Y	Patient approached by conflicting study.	2	0	0
PS_147	n/a	81	F	N	White	Y	Patient approached by conflicting study.	2	0	0
PS_148	n/a	73	F	N	Black	Y	Patient approached by conflicting study.	2	0	0
PS_150	n/a	74	F	N	White	Y	Patient approached by conflicting study.	2	0	0
PS_152	n/a	66	M	N	UNK	Y	Patient approached by conflicting study.	2	0	0
PS_160	n/a	65	M	N	White	Y	Patient approached by conflicting study.	2	0	0
PS_162	n/a	81	F	N	White	Y	Patient approached by conflicting study.	2	0	0
PS_163	n/a	67	M	N	White	Y	Patient approached by conflicting study.	2	0	0
PS_171	n/a	65	M	N	White	Y	Patient approached by conflicting study.	2	0	0
PS_179		82	M	N	White	Y	Patient approached by conflicting study.	2	0	0
PS_180		72	M	N	White	Y	Patient approached by conflicting study.	2	0	0
PS_185		70	M	N	White	Y?	Patient approached by conflicting study.	2	0	0
PS_189		78	M	N	White	Y	Patient approached by conflicting study.	2	0	0
PS_194		77	M	N	White	Y	Patient approached by conflicting study.	2	0	0
PS_219		77	F	N	White	Y	Patient approached by conflicting study.	2	0	0
PS_225		70	F	N	White	Y	Patient approached by conflicting study.	2	0	0
PS_227		76	M	N	White	Y	Patient approached by conflicting study.	2	0	0
PS_239		76	F	N	White	Y	Patient approached by conflicting study.	2	0	0
PS_292		73	F	N	White	Y	Patient approached by conflicting study.	2	0	0
PS_302		81	M	N	White	Y	Patient approached by conflicting study.	2	0	0
PS_304		73	M	N	White	Y	Patient approached by conflicting study.	2	0	0
PS_312		71	M	N	White	Y	Patient approached by conflicting study.	2	0	0
PS_320		61	M	UNK	White	Y	Patient approached by conflicting study.	2	0	0
PS_334		77	M	N	White	Y	Patient approached by conflicting study.	2	0	0
PS_346		73	M	N	White	Y	Patient approached by conflicting study.	2	0	0
PS_353		73	M	N	White	Y	Patient approached by conflicting study.	2	0	0
PS_364		76	M	N	White	Y	Patient approached by conflicting study.	2	0	0
PS_365		75	M	N	White	Y	Patient approached by conflicting study.	2	0	0
PS_374		74	M	N	White	Y	Patient approached by conflicting study.	2	0	0
PS_381		68	M	N	White	Y	Patient approached by conflicting study.	2	0	0
PS_441		70	M	N	White	Y	Patient approached by conflicting study.	2	0	0
PS_451		76	M	N	White	Y	Patient approached by conflicting study.	2	0	0
PS_465		66	M	N	White	Y	Patient approached by conflicting study.	2	0	0
PS_470		74	F	N	White	Y	Patient approached by conflicting study.	2	0	0
PS_500		73	F	N	White	Y	Patient approached by conflicting study.	2	0	0
PS_505		82	M	N	White	Y	Patient approached by conflicting study.	2	0	0
PS_506		74	M	N	White	Y	Patient approached by conflicting study.	2	0	0
PS_552		62	M	N	White	Y	Patient approached by conflicting study.	2	0	0
PS_558		73	M	N	White	Y	Patient approached by conflicting study.	2	0	0
PS_561		80	M	N	White	Y	Patient approached by conflicting study.	2	0	0
PS_562		84	M	N	White	Y	Patient approached by conflicting study.	2	0	0
PS_576		79	F	N	Unk	Y	Patient approached by conflicting study.	2	0	0
PS_611		78	M	N	White	Y	Patient approached by conflicting study.	2	0	0
PS_613		71	F	N	White	Y	Patient approached by conflicting study.	2	0	0
PS_620		66	F	N	White	Y	Patient approached by conflicting study.	2	0	0
PS_621		64	M	N	White	Y	Patient approached by conflicting study.	2	0	0
PS_633		64	F	N	White	Y	Patient approached by conflicting study.	2	0	0
PS_635		65	M	N	White	Y	Patient approached by conflicting study.	2	0	0
PS_636		66	F	N	White	Y	Patient approached by conflicting study.	2	0	0
PS_638		85	M	N	White	Y	Patient approached by conflicting study.	2	0	0
PS_640		85	M	N	White	Y	Patient approached by conflicting study.	2	0	0
PS_647		71	M	N	White	Y	Patient approached by conflicting study.	2	0	0
PS_658		73	M	Y	Other	Y	Patient approached by conflicting study.	2	0	0
PS_661		71	M	N	White	Y	Patient approached by conflicting study.	2	0	0
PS_662		79	M	N	White	Y	Patient approached by conflicting study.	2	0	0
PS_694		74	M	N	White	Y	Patient approached by conflicting study.	2	0	0
PS_696		71	M	N	White	Y	Patient approached by conflicting study.	2	0	0
PS_708		67	M	Unk	Unk	Y	Patient approached by conflicting study.	2	0	0
PS_709		69	M	N	White	Y	Patient approached by conflicting study.	2	0	0
PS_728		63	M	N	White	Y	Patient approached by conflicting study.	2	0	0
PS_730		69	M	N	White	Y	Patient approached by conflicting study.	2	0	0
PS_731		69	M	N	White	Y	Patient approached by conflicting study.	2	0	0
PS_736		79	M	N	White	Y	Patient approached by conflicting study.	2	0	0
PS_742		60	M	N	White	Y	Patient approached by conflicting study.	2	0	0
PS_744		66	M	N	White	Y	Patient approached by conflicting study.	2	0	0
PS_748		81	F	N	White	Y	Patient approached by conflicting study.	2	0	0
PS_755		71	M	N	White	Y	Patient approached by conflicting study.	2	0	0
PS_756		76	F	N	White	Y	Patient approached by conflicting study.	2	0	0
PS_773		66	M	N	White	Y	Patient approached by conflicting study.	2	0	0
PS_779		78	M	N	White	Y**CALL ABOUT ATIVAN	Patient approached by conflicting study.	2	0	0
PS_785		64	M	N	White	Y	Patient approached by conflicting study.	2	0	0
PS_787		67	M	Unk	White	Y	Patient approached by conflicting study.	2	0	0
PS_798		62	M	N	White	Y	Patient approached by conflicting study.	2	0	0
PS_806		66	F	N	White	Y	Patient approached by conflicting study.	2	0	0
PS_811		72	M	N	White	Y	Patient approached by conflicting study.	2	0	0
PS_815		71	F	N	Black	Y	Patient approached by conflicting study.	2	0	0
PS_820		62	F	Unk	White	Y	Patient approached by conflicting study.	2	0	0
PS_821		54	F	N	White	Y	Patient approached by conflicting study.	2	0	0
PS_822		69	M	N	White	Y	Patient approached by conflicting study.	2	0	0
PS_826		75	M	N	White	Y	Patient approached by conflicting study.	2	0	0
PS_835		68	F	Unk	White	Y	Patient approached by conflicting study.	2	0	0
PS_847		62	M	N	Unk	Y	Patient approached by conflicting study.	2	0	0
PS_853		66	M	N	White	Y	Patient approached by conflicting study.	2	0	0
PS_855		66	M	N	White	Y	Patient approached by conflicting study.	2	0	0
PS_858		61	F	N	White	Y	Patient approached by conflicting study.	2	0	0
PS_866		74	M	N	Asian	Y	Patient approached by conflicting study.	2	0	0
PS_868		72	F	N	White	Y	Patient approached by conflicting study.	2	0	0
PS_872		61	F	N	White	Y	Patient approached by conflicting study.	2	0	0
PS_878		78	F	N	White	Y	Patient approached by conflicting study.	2	0	0
PS_887		75	F	N	White	Y	Patient approached by conflicting study.	2	0	0
PS_889		67	M	N	White	Y	Patient approached by conflicting study.	2	0	0
PS_893		75	M	N	White	Y	Patient approached by conflicting study.	2	0	0
PS_907		73	M	N	White	Y	Patient approached by conflicting study.	2	0	0
PS_916		80	F	N	Black	Y	Patient approached by conflicting study.	2	0	0
PS_947		71	M	Unk	White	Y	Patient approached by conflicting study.	2	0	0
PS_951		80	F	N	White	Y	Patient approached by conflicting study.	2	0	0
PS_952		83	M	N	White	Y	Patient approached by conflicting study.	2	0	0
PS_963		60	M	N	White	Y	Patient approached by conflicting study.	2	0	0
PS_965		67	F	N	White	Y	Patient approached by conflicting study.	2	0	0
PS_977		70	F	N	White	Y	Patient approached by conflicting study.	2	0	0
PS_979		76	M	N	White	Y	Patient approached by conflicting study.	2	0	0
PS_989		70	F	N	White	Y	Patient approached by conflicting study.	2	0	0
PS_990		71	M	N	White	Y	Patient approached by conflicting study.	2	0	0
PS_1003		66	F	N	White	Y	Patient approached by conflicting study.	2	0	0
PS_1004		72	F	N	White	Y	Patient approached by conflicting study.	2	0	0
PS_1006		76	F	N	White	Y	Patient approached by conflicting study.	2	0	0
PS_1008		81	M	N	White	Y	Patient approached by conflicting study.	2	0	0
PS_1014		62	M	N	Asian	Y	Patient approached by conflicting study.	2	0	0
PS_1024		75	M	N	White	Y	Patient approached by conflicting study.	2	0	0
PS_1031		68	M	N	White	Y	Patient approached by conflicting study.	2	0	0
PS_1034		71	M	N	Unknown	Y	Patient approached by conflicting study.	2	0	0
PS_1035		73	M	N	White	Y	Patient approached by conflicting study.	2	0	0
PS_1043		67	M	N	White	Y	Patient approached by conflicting study.	2	0	0
PS_1050		81	M	N	White	Y	Patient approached by conflicting study.	2	0	0
PS_1066		68	F	N	White	Y	Patient approached by conflicting study.	2	0	0
PS_1080		82	M	N	White	Y	Patient approached by conflicting study.	2	0	0
PS_1087		72	M	Unk	White	Y	Patient approached by conflicting study.	2	0	0
PS_1100		70	F	N	White	Y	Patient approached by conflicting study.	2	0	0
PS_1104		81	F	N	White	Y	Patient approached by conflicting study.	2	0	0
PS_1112		73	M	N	Asian	Y	Patient approached by conflicting study.	2	0	0
PS_1120		67	F	N	White	Y	Patient approached by conflicting study.	2	0	0
PS_1122		72	M	N	White	Y	Patient approached by conflicting study.	2	0	0
PS_1131		65	M	N	White	Y	Patient approached by conflicting study.	2	0	0
PS_1132		66	M	N	White	Y	Patient approached by conflicting study.	2	0	0
PS_1138		n/a	M	Unk	Unknown	Y	Patient approached by conflicting study.	2	0	0
PS_1141		68	M	N	White	Y	Patient approached by conflicting study.	2	0	0
PS_1145		63	M	N	White	Y	Patient approached by conflicting study.	2	0	0
PS_1150		80	M	N	White	Y	Patient approached by conflicting study.	2	0	0
PS_1157		71	M	Unk	White	Y	Patient approached by conflicting study.	2	0	0
PS_1169		71	M	N	White	Y	Patient approached by conflicting study.	2	0	0
PS_1175		79	M	N	White	Y	Patient approached by conflicting study.	2	0	0					written consent on 11/25/2019, but case canceled after pt entered OR. Surgery Reschedueled for 1/14 and consent obtained again
PS_1185		68	M	Unk	White	Y	Patient approached by conflicting study.	2	0	0
PS_1198		67	M	N	White	Y	Patient approached by conflicting study.	2	0	0
PS_1208		66	M	N	White	Y	Patient approached by conflicting study.	2	0	0
PS_1215		81	M	N	White	Y	Patient approached by conflicting study.	2	0	0
PS_1221		66	M	N	White	Y	Patient approached by conflicting study.	2	0	0					written consent on 12/4, but case canceled. Reschedule for 12/9
PS_1235		73	M	N	White	Y	Patient approached by conflicting study.	2	0	0
PS_1236		81	F	N	White	Y	Patient approached by conflicting study.	2	0	0
PS_1253		68	M	N	White	Y	Patient approached by conflicting study.	2	0	0
PS_1261		62	M	N	White	Y	Patient approached by conflicting study.	2	0	0
PS_1274		70	M	N	White	Y	Patient approached by conflicting study.	2	0	0
PS_1276		62	M	Y	White	Y	Patient approached by conflicting study.	2	0	0
PS_1283		61	M	N	White	Y	Patient approached by conflicting study.	2	0	0
PS_1287		66	M	N	White	Y	Patient approached by conflicting study.	2	0	0
PS_1290		71	M	N	White	Y	Patient approached by conflicting study.	2	0	0
PS_1303		80	M	N	White	Y	Patient approached by conflicting study.	2	0	0
PS_1308		63	M	N	White	Y	Patient approached by conflicting study.	2	0	0
PS_1309		70	M	N	White	Y	Patient approached by conflicting study.	2	0	0
PS_1317		73	M	N	White	Y	Patient approached by conflicting study.	2	0	0
PS_1319		72	M	N	White	Y	Patient approached by conflicting study.	2	0	0
PS_1325		61	M	N	White	Y	Patient approached by conflicting study.	2	0	0
PS_1326		68	M	N	White	Y	Patient approached by conflicting study.	2	0	0
PS_1339		65	M	N	White	Y	Patient approached by conflicting study.	2	0	0
PS_1345		69	M	N	White	Y	Patient approached by conflicting study.	2	0	0
PS_1355		70	M	N	White	Y	Patient approached by conflicting study.	2	0	0
PS_1364		65	M	N	White	Y	Patient approached by conflicting study.	2	0	0
PS_1366		69	M	N	White	Y	Patient approached by conflicting study.	2	0	0
PS_1380		75	M	Unk	White	Y	Patient approached by conflicting study.	2	0	0
PS_1396		82	F	N	White	Y	Patient approached by conflicting study.	2	0	0
PS_1405		82	M	Unk	White	Y	Patient approached by conflicting study.	2	0	0
PS_1415		74	M	N	White	Y	Patient approached by conflicting study.	2	0	0
PS_1418		80	M	N	White	Y	Patient approached by conflicting study.	2	0	0
PS_1421		76	M	Unk	White	Y	Patient approached by conflicting study.	2	0	0
PS_1422		73	F	N	White	Y	Patient approached by conflicting study.	2	0	0
PS_1441		78	M	N	White	Y	Patient approached by conflicting study.	2	0	0
PS_1456			F	N	White	N	Patient approached by conflicting study.	2	0	0
PS_1461		69	M	N	White	Y	Patient approached by conflicting study.	2	0	0
PS_1469		79	M	Unk	White	Y	Patient approached by conflicting study.	2	0	0
PS_1479		65	F	N	White	Y	Patient approached by conflicting study.	2	0	0
PS_1480		69	F	N	White	Y	Patient approached by conflicting study.	2	0	0
PS_1481		71	M	N	White	Y	Patient approached by conflicting study.	2	0	0
PS_1490		74	F	N	White	Y	Patient approached by conflicting study.	2	0	0
PS_1498		64	M	N	White	Y	Patient approached by conflicting study.	2	0	0
PS_1499		65	M	N	White	Y	Patient approached by conflicting study.	2	0	0
PS_1511		60	F	Unk	White	Y	Patient approached by conflicting study.	2	0	0
PS_1523		60	M	N	White	Y	Patient approached by conflicting study.	2	0	0
PS_1524		61	M	N	Asian	Y	Patient approached by conflicting study.	2	0	0
PS_1528		70	M	N	White	Y	Patient approached by conflicting study.	2	0	0
PS_1535		72	M	N	White	Y	Patient approached by conflicting study.	2	0	0
PS_1538		69	M	Unk	White	Y	Patient approached by conflicting study.	2	0	0
PS_1549		61	M	N	Asian	Y	Patient approached by conflicting study.	2	0	0
PS_1550		63	M	N	Asian	Y	Patient approached by conflicting study.	2	0	0
PS_1551		69	M	N	White	Y	Patient approached by conflicting study.	2	0	0
PS_1560		57	M	N	White	Y	Patient approached by conflicting study.	2	0	0
PS_1565		71	F	N	White	Y	Patient approached by conflicting study.	2	0	0
PS_1575		67	M	N	White	Y	Patient approached by conflicting study.	2	0	0
PS_1579		71	F	N	White	Y	Patient approached by conflicting study.	2	0	0
PS_1580		72	M	N	White	Y	Patient approached by conflicting study.	2	0	0
PS_1583		65	M	N	White	Y	Patient approached by conflicting study.	2	0	0
PS_1584		67	M	N	White	Y	Patient approached by conflicting study.	2	0	0
PS_1588		69	M	N	White	Y	Patient approached by conflicting study.	2	0	0
PS_1603		66	M	Unk	White	Y	Patient approached by conflicting study.	2	0	0
PS_1604		72	F	N	White	Y	Patient approached by conflicting study.	2	0	0
PS_1615		67	F	N	White	Y	Patient approached by conflicting study.	2	0	0
PS_1617		73	F	N	White	Y	Patient approached by conflicting study.	2	0	0
PS_1632		72	M	N	White	Y	Patient approached by conflicting study.	2	0	0
PS_1634		77	M	N	White	Y	Patient approached by conflicting study.	2	0	0
PS_1641		64	M	N	White	Y	Patient approached by conflicting study.	2	0	0
PS_1657		68	M	N	White	Y	Patient approached by conflicting study.	2	0	0
PS_1662		61	F	N	White	Y	Patient approached by conflicting study.	2	0	0
PS_1667		60	M	N	White	Y	Patient approached by conflicting study.	2	0	0
PS_1671		72	M	N	White	Y	Patient approached by conflicting study.	2	0	0
PS_1672		76	M	N	White	Y	Patient approached by conflicting study.	2	0	0
PS_1683		61	F	N	White	Y	Patient approached by conflicting study.	2	0	0
PS_1684		63	M	N	White	Y	Patient approached by conflicting study.	2	0	0
PS_1686			M	N	White	N	Patient approached by conflicting study.	2	0	0
PS_1699		62	F	N	Unknown	Y	Patient approached by conflicting study.	2	0	0
PS_1701		70	M	N	White	Y	Patient approached by conflicting study.	2	0	0
PS_1714		65	F	N	White	Y	Patient approached by conflicting study.	2	0	0
PS_1716		73	M	N	White	Y	Patient approached by conflicting study.	2	0	0
PS_1740		62	F	N	White	Y	Patient approached by conflicting study.	2	0	0
PS_1744		73	F	N	White	Y	Patient approached by conflicting study.	2	0	0
PS_1745		76	F	N	White	Y	Patient approached by conflicting study.	2	0	0
PS_1750		76	M	N	White	Y	Patient approached by conflicting study.	2	0	0
PS_1751		68	F	N	White	Y	Patient approached by conflicting study.	2	0	0
PS_1759		64	M	N	White	Y	Patient approached by conflicting study.	2	0	0
PS_1767		82	M	N	White	Y	Patient approached by conflicting study.	2	0	0
PS_1774		76	F	N	White	Y	Patient approached by conflicting study.	2	0	0
PS_1775		77	M	Unk	Unknown	Y	Patient approached by conflicting study.	2	0	0
PS_1783		62	M	N	White	Y	Patient approached by conflicting study.	2	0	0
PS_1786		66	F	N	White	Y	Patient approached by conflicting study.	2	0	0
PS_1788		79	M	N	White	Y	Patient approached by conflicting study.	2	0	0
PS_1790		83	M	N	White	Y	Patient approached by conflicting study.	2	0	0
PS_1797		73	M	N	White	Y	Patient approached by conflicting study.	2	0	0
PS_1799		76	M	N	White	Y	Patient approached by conflicting study.	2	0	0
PS_1809		62	F	Unk	Unknown	Y	Patient approached by conflicting study.	2	0	0
PS_1811		63	F	N	White	Y	Patient approached by conflicting study.	2	0	0
PS_1813		65	M	N	White	Y	Patient approached by conflicting study.	2	0	0
PS_1814		71	M	N	White	Y	Patient approached by conflicting study.	2	0	0
PS_1821		67	M	N	White	Y	Patient approached by conflicting study.	2	0	0
PS_1827		76	F	N	White	Y	Patient approached by conflicting study.	2	0	0
PS_1833		61	M	N	White	Y	Patient approached by conflicting study.	2	0	0
PS_1834		64	M	N	White	Y	Patient approached by conflicting study.	2	0	0
PS_1835		69	F	N	White	Y	Patient approached by conflicting study.	2	0	0
PS_1838		78	F	N	White	Y	Patient approached by conflicting study.	2	0	0
PS_1849		72	F	N	White	Y	Patient approached by conflicting study.	2	0	0
PS_1851		81	F	N	White	Y	Patient approached by conflicting study.	2	0	0
PS_1852		83	M	N	White	Y	Patient approached by conflicting study.	2	0	0
PS_1859		65	M	N	White	Y	Patient approached by conflicting study.	2	0	0
PS_1865		81	F	Unk	Unknown	Y	Patient approached by conflicting study.	2	0	0
PS_1876		81	F	N	White	Y	Patient approached by conflicting study.	2	0	0
PS_1877		83	M	N	White	Y	Patient approached by conflicting study.	2	0	0
PS_1886		70	M	N	White	Y	Patient approached by conflicting study.	2	0	0
PS_1891		78	M	N	White	Y	Patient approached by conflicting study.	2	0	0
PS_1899		62	M	N	White	Y	Patient approached by conflicting study.	2	0	0
PS_1903		79	M	N	White	Y	Patient approached by conflicting study.	2	0	0
PS_1912		67	F	N	White	Y	Patient approached by conflicting study.	2	0	0
PS_1925		67	M	N	White	Y	Patient approached by conflicting study.	2	0	0
PS_1926		68	F	N	White	Y	Patient approached by conflicting study.	2	0	0
PS_1929		75	M	N	White	Y	Patient approached by conflicting study.	2	0	0
PS_1932		71	M	Unk	White	Y	Patient approached by conflicting study.	2	0	0
PS_1938		66	M	Unk	White	Y	Patient approached by conflicting study.	2	0	0
PS_1941		69	F	N	White	Y	Patient approached by conflicting study.	2	0	0
PS_1948		63	F	N	White	Y	Patient approached by conflicting study.	2	0	0
															Not approached for other reason
PS_019	n/a	79	M	N	White	Y	Dropped from screening list on 3/9/2017 due to insurance problems.	3	0	0
PS_031	n/a	67	F	N	White	Y	Patient left before could approach.	3	0	0
PS_032	n/a	71	F	N	White	Y	Patient left before could approach.	3	0	0
PS_033	n/a	60	M	N	White	Y	Patient left before could approach.	3	0	0
PS_040	n/a	69	M	N	White	Y	Patient left before could approach.	3	0	0
PS_041	n/a	73	M	N	White	Y	Patient left before could approach.	3	0	0
PS_051	n/a	75	M	N	White	Y	Patient left before could approach.	3	0	0
PS_057	n/a	86	F	N	White	Y	Patient not approached due to study on hold.	3	0	0
PS_066	n/a	85	F	N	White	Y	Patient left before could approach.	3	0	0
PS_113		65	M	N	White	Y	Surgery canceled.	3	0	0
PS_122		72	M	N	White	Y	Surgery canceled.	3	0	0
PS_153	n/a	80	M	N	White	Y	Patient not approached due to study on hold.	3	0	0
PS_165	n/a	82	F	N	White	Y	Patient left before could approach.	3	0	0
PS_191		78	M	N	White	Y	Patient left before could approach.	3	0	0
PS_242		64	M	N	White	Y	Patient left before could approach.	3	0	0
PS_250		69	F	N	White	Y	PPE canceled.	3	0	0
PS_275		64	M	N	White	Y	PPE canceled.	3	0	0
PS_280		71	M	N	White	Y	Patient left before could approach.	3	0	0
PS_299		65	M	N	White	Y	Patient left before could approach.	3	0	0
PS_311		72	F	N	White	Y	Surgery canceled.	3	0	0
PS_317		78	M	N	White	Y	Patient not approached due to study on IRB lapse.	3	0	0
PS_321		67	F	N	White	Y	Patient not approached due to study on IRB lapse.	3	0	0
PS_323		81	M	N	White	Y	Patient left before could approach.	3	0	0
PS_324		73	M	N	White	Y	Patient not approached due to study on IRB lapse.	3	0	0
PS_395		81	M	UNK	White	Y	PPE canceled.	3	0	0
PS_450		73	F	N	White	Y	Patient left before could approach.	3	0	0
PS_485		60	M	N	White	Y	Patient left before could approach.	3	0	0
PS_521		81	M	N	White	Y	Patient left before could approach.	3	0	0
PS_547		65	M	Unk	White	Y	PPE canceled.	3	0	0
PS_595		71	M	Unk	White	Y	Patient left before could approach.	3	0	0
PS_604		84	M	N	White	Y	PPE canceled	3	0	0
PS_642		77	M	N	White	Y	Surgery canceled.	3	0	0
PS_838		68	M	N	Other	Y	Surgery canceled.	3	0	0
PS_840		70	M	N	White	Y	Surgery canceled.	3	0	0
PS_841		82	M	N	Unk	Y	Surgery canceled.	3	0	0
PS_846		71	F	N	White	Y	Patient left before could approach.	3	0	0
PS_873		70	F	N	White	Y	Surgery canceled.	3	0	0
PS_898		70	M	N	White	Y	Surgery canceled.	3	0	0
PS_948		73	F	N	White	Y	PPE canceled.	3	0	0
PS_1030		66	M	N	White	Y	Patient left before could approach.	3	0	0
PS_1075		68	M	N	White	Y	Patient left before could approach.	3	0	0
PS_1078		70	M	Unk	White	Y	Patient left before could approach.	3	0	0
PS_1125		72	M	N	White	Y	Patient left before could approach.	3	0	0
PS_1139		81	M	N	White	Y	Patient left before could approach.	3	0	0
PS_1171		75	F	N	White	Y	Patient left before could approach.	3	0	0
PS_1173		77	F	N	White	Y	Surgery canceled.	3	0	0
PS_1218		64	F	N	White	Y	PPE canceled.	3	0	0
PS_1280		69	M	N	Black or African American	Y	PPE canceled.	3	0	0
PS_1357		81	M	Unk	White	Y	Patient left before could approach.	3	0	0
PS_1378		60	F	N	White	Y	Patient left before could approach.	3	0	0
PS_1401		71	F	N	White	Y	Patient left before could approach.	3	0	0
PS_1423		71	M	N	White	Y	Patient left before could approach.	3	0	0
PS_1452		70	M	N	White	Y	Patient left before could approach.	3	0	0
PS_1467		66	M	N	White	Y	PPE canceled.	3	0	0
PS_1752		72	M	N	White	Y	Patient left before could approach.	3	0	0
PS_1854		85	M	N	White	Y	Surgery canceled at consult.	3	0	0
PS_1940		67	F	N	White	Y	Patient left before could approach.	3	0	0
PS_1950		70	F	N	White	Y	Patient not approached due to study on coronavirus shutdown.	3	0	0
PS_1953		81	M	N	Asian	Y	Patient not approached due to study on coronavirus shutdown.	3	0	0
PS_687		60	M	N	White	Y	**DUPLICATE. See MINDDS_CARD_110	0	0	0
PS_713		71	M	N	White	Y		0	0	0
PS_738		69	M	Unk	White	Y	**DUPLICATE. Patient will not book surgery for another year. Approach at PPE. See MINDDS_CARD_108	0	0	0
PS_964		66	F	N	White	Y	**DUPLICATE. Patient canceled PPE and surgery in September. Patient returned in Jan 2019. See PS_1176.	0	0	0
															Not approached because ineligible
PS_002	n/a		F	Y	Hispanic or Latino	N	Ineligible.	1	0	0
PS_003	n/a		M	N	White	N	Ineligible.	1	0	0
PS_004	n/a		F	N	White	N	Ineligible.	1	0	0
PS_006	n/a		M	N	White	N	Ineligible.	1	0	0
PS_007	n/a		F	N	White	N	Ineligible.	1	0	0
PS_008	n/a		M	N	White	N	Ineligible.	1	0	0
PS_009	n/a		F	N	White	N	Ineligible.	1	0	0
PS_010	n/a		M	N	White	N	Ineligible.	1	0	0
PS_013	n/a		F	N	White	N	Ineligible.	1	0	0
PS_014	n/a		M	N	Asian	N	Ineligible.	1	0	0
PS_016	n/a		F	N	White	N	Ineligible.	1	0	0
PS_017	n/a		F	N	White	N	Ineligible.	1	0	0
PS_018	n/a		M	UNK	UNK	N	Ineligible.	1	0	0
PS_022	n/a		M	N	White	N	Ineligible.	1	0	0
PS_023	n/a		M	N	White	N	Ineligible.	1	0	0
PS_024	n/a		F	N	White	N	Ineligible.	1	0	0
PS_025	n/a		F	N	White	N	Ineligible.	1	0	0
PS_026	n/a		M	N	White	N	Ineligible.	1	0	0
PS_028	n/a		F	Y	Other	N	Ineligible.	1	0	0
PS_029	n/a		F	N	White	N	Ineligible.	1	0	0
PS_030	n/a		F	N	White	N	Ineligible.	1	0	0
PS_034	n/a		F	N	White	N	Ineligible.	1	0	0
PS_036	n/a		F	Y	White	N	Ineligible.	1	0	0
PS_037	n/a		M	N	White	N	Ineligible.	1	0	0
PS_038	n/a		M	N	White	N	Ineligible.	1	0	0
PS_039	n/a		F	Y	Other	N	Ineligible.	1	0	0
PS_043	n/a		F	UNK	White	N	Ineligible.	1	0	0
PS_045	n/a		M	N	White	N	Ineligible.	1	0	0
PS_046	n/a		M	N	White	N	Ineligible.	1	0	0
PS_047	n/a		F	N	White	N	Ineligible.	1	0	0
PS_048	n/a		M	N	White	N	Ineligible.	1	0	0
PS_050	n/a		M	N	White	N	Ineligible.	1	0	0
PS_053	n/a		M	N	White	N	Ineligible.	1	0	0
PS_054	n/a		M	N	White	N	Ineligible.	1	0	0
PS_055	n/a		F	N	White	N	Ineligible.	1	0	0
PS_056	n/a		M	N	White	N	Ineligible.	1	0	0
PS_059	n/a		M	N	Black	N	Ineligible.	1	0	0
PS_060	n/a		M	UNK	White	N	Ineligible.	1	0	0
PS_061	n/a		F	N	White	N	Ineligible.	1	0	0
PS_062	n/a		M	N	White	N	Ineligible.	1	0	0
PS_064	n/a		M	N	White	N	Ineligible.	1	0	0
PS_065	n/a		F	N	White	N	Ineligible.	1	0	0
PS_069	n/a		M	N	White	N	Ineligible.	1	0	0
PS_070	n/a		M	N	White	N	Ineligible.	1	0	0
PS_071	n/a		M	N	White	N	Ineligible.	1	0	0
PS_072	n/a		F	N	White	N	Ineligible.	1	0	0
PS_073	n/a		M	N	White	N	Ineligible.	1	0	0
PS_074	n/a		M	N	White	N	Ineligible.	1	0	0
PS_075	n/a		F	N	White	N	Ineligible.	1	0	0
PS_077	n/a		F	N	White	N	Ineligible.	1	0	0
PS_078	n/a		M	N	White	N	Ineligible.	1	0	0
PS_079	n/a		F	N	White	N	Ineligible.	1	0	0
PS_080	n/a		F	N	White	N	Ineligible.	1	0	0
PS_081	n/a		M	N	White	N	Ineligible.	1	0	0
PS_082	n/a		M	N	White	N	Ineligible.	1	0	0
PS_083	n/a		M	N	White	N	Ineligible.	1	0	0
PS_085	n/a		F	Y	Other	N	Ineligible.	1	0	0
PS_087	n/a		M	N	White	N	Ineligible.	1	0	0
PS_088	n/a		F	N	White	N	Ineligible.	1	0	0
PS_089	n/a		M	Y	White	N	Ineligible.	1	0	0
PS_090	n/a		F	N	White	N	Ineligible.	1	0	0
PS_091	n/a		M	N	White	N	Ineligible.	1	0	0
PS_092	n/a		F	N	White	N	Ineligible.	1	0	0
PS_094	n/a		M	N	White	N	Ineligible.	1	0	0
PS_097	n/a		M	UNK	White	N	Ineligible.	1	0	0
PS_098	n/a		M	N	White	N	Ineligible.	1	0	0
PS_101	n/a		M	N	White	N	Ineligible.	1	0	0
PS_102	n/a		M	N	White	N	Ineligible.	1	0	0
PS_103	n/a		F	N	White	N	Ineligible.	1	0	0
PS_104	n/a		F	UNK	White	N	Ineligible.	1	0	0
PS_106	n/a		M	N	White	N	Ineligible.	1	0	0
PS_116	n/a		M	UNK	White	N	Ineligible.	1	0	0
PS_118	n/a		M	UNK	UNK	N	Ineligible.	1	0	0
PS_119	n/a		M	N	White	N	Ineligible.	1	0	0
PS_120	n/a		F	N	White	N	Ineligible.	1	0	0
PS_121	n/a		F	N	White	N	Ineligible.	1	0	0
PS_127			M	Y	White	N	Ineligible.	1	0	0
PS_128	n/a		M	N	White	N	Ineligible.	1	0	0
PS_129	n/a		M	N	White	N	Ineligible.	1	0	0
PS_130	n/a		M	N	White	N	Ineligible.	1	0	0
PS_131	n/a		M	N	White	N	Ineligible.	1	0	0
PS_132	n/a		F	N	White	N	Ineligible.	1	0	0
PS_133	n/a		F	N	Black	N	Ineligible.	1	0	0
PS_134	n/a		M	N	White	N	Ineligible.	1	0	0
PS_136	n/a		M	N	White	N	Ineligible.	1	0	0
PS_137	n/a		F	N	White	N	Ineligible.	1	0	0
PS_140	n/a		M	N	White	N	Ineligible.	1	0	0
PS_145	n/a		F	N	White	N	Ineligible.	1	0	0
PS_146	n/a		M	N	White	N	Ineligible.	1	0	0
PS_155	n/a		M	N	White	N	Ineligible.	1	0	0
PS_157	n/a		M	N	White	N	Ineligible.	1	0	0
PS_158	n/a		M	N	White	N	Ineligible.	1	0	0
PS_164	n/a		F	UNK	White	N	Ineligible.	1	0	0
PS_170	n/a		M	N	White	N	Ineligible.	1	0	0
PS_172			M	N	UNK	N	Ineligible.	1	0	0
PS_173			M	N	White	N	Ineligible.	1	0	0
PS_176			M	N	White	N	Ineligible.	1	0	0
PS_177			M	UNK	White	N	Ineligible.	1	0	0
PS_178			M	N	White	N	Ineligible.	1	0	0
PS_181			M	N	White	N	Ineligible.	1	0	0
PS_182			M	N	White	N	Ineligible.	1	0	0
PS_184			M	N	White	N	Ineligible.	1	0	0
PS_186			M	N	White	N	Ineligible.	1	0	0
PS_187			M	N	White	N	Ineligible.	1	0	0
PS_192			F	N	White	N	Ineligible.	1	0	0
PS_195			F	N	White	N	Ineligible.	1	0	0
PS_197			M	N	White	N	Ineligible.	1	0	0
PS_198			F	N	White	N	Ineligible.	1	0	0
PS_199			F	N	Asian	N	Ineligible.	1	0	0
PS_200			M	N	White	N	Ineligible.	1	0	0
PS_201			F	N	White	N	Ineligible.	1	0	0
PS_203			F	N	White	N	Ineligible.	1	0	0
PS_208			F	N	White	N	Ineligible.	1	0	0
PS_209			M	N	White	N	Ineligible.	1	0	0
PS_210			M	N	American Indian or Alaska Native	N	Ineligible.	1	0	0
PS_211			M	N	White	N	Ineligible.	1	0	0
PS_212			F	N	White	N	Ineligible.	1	0	0
PS_213			M	N	White	N	Ineligible.	1	0	0
PS_214			F	N	White	N	Ineligible.	1	0	0
PS_215			M	N	White	N	Ineligible.	1	0	0
PS_217			F	N	White	N	Ineligible.	1	0	0
PS_218			F	N	White	N	Ineligible.	1	0	0
PS_221			M	UNK	Asian	N	Ineligible.	1	0	0
PS_228			F	N	White	N	Ineligible.	1	0	0
PS_231			M	N	White	N	Ineligible.	1	0	0
PS_232			M	N	White	N	Ineligible.	1	0	0
PS_235			UNK	UNK	UNK	N	Ineligible.	1	0	0
PS_238			M	N	White	N	Ineligible.	1	0	0
PS_240			M	N	White	N	Ineligible.	1	0	0
PS_243			M	N	White	N	Ineligible.	1	0	0
PS_244			M	UNK	UNK	N	Ineligible.	1	0	0
PS_245			F	N	White	N	Ineligible.	1	0	0
PS_246			F	Y	Other	N	Ineligible.	1	0	0
PS_248			F	N	White	N	Ineligible.	1	0	0
PS_249			F	N	White	N	Ineligible.	1	0	0
PS_251			F	N	White	N	Ineligible.	1	0	0
PS_253			M	N	White	N	Ineligible.	1	0	0
PS_254			M	N	White	N	Ineligible.	1	0	0
PS_258			M	N	White	N	Ineligible.	1	0	0
PS_259			F	Y	White	N	Ineligible.	1	0	0
PS_260			M	N	White	N	Ineligible.	1	0	0
PS_262			F	N	White	N	Ineligible.	1	0	0
PS_263			F	N	White	N	Ineligible.	1	0	0
PS_264			M	N	White	N	Ineligible.	1	0	0
PS_268			F	N	White	N	Ineligible.	1	0	0
PS_269			F	N	White	N	Ineligible.	1	0	0
PS_271			F	N	White	N	Ineligible.	1	0	0
PS_272			M	N	Asian	N	Ineligible.	1	0	0
PS_274			M	N	White	N	Ineligible.	1	0	0
PS_276			F	Y	Other	N	Ineligible.	1	0	0
PS_279			M	N	White	N	Ineligible.	1	0	0
PS_281			M	N	White	N	Ineligible.	1	0	0
PS_282			M	N	White	N	Ineligible.	1	0	0
PS_283			F	N	White	N	Ineligible.	1	0	0
PS_284			M	N	White	N	Ineligible.	1	0	0
PS_285			F	N	White	N	Ineligible.	1	0	0
PS_286			M	N	White	N	Ineligible.	1	0	0
PS_287			F	N	White	N	Ineligible.	1	0	0
PS_288			M	N	White	N	Ineligible.	1	0	0
PS_289			F	N	White	N	Ineligible.	1	0	0
PS_290			F	N	White	N	Ineligible.	1	0	0
PS_295			F	N	White	N	Ineligible.	1	0	0
PS_297			M	N	Asian	N	Ineligible.	1	0	0
PS_298			M	Y	Other	N	Ineligible.	1	0	0
PS_300			M	UNK	White	N	Ineligible.	1	0	0
PS_303			M	N	White	N	Ineligible.	1	0	0
PS_305			M	N	White	N	Ineligible.	1	0	0
PS_306			F	N	White	N	Ineligible.	1	0	0
PS_307			M	N	White	N	Ineligible.	1	0	0
PS_310			F	N	White	N	Ineligible.	1	0	0
PS_313			M	N	White	N	Ineligible.	1	0	0
PS_314			F	N	White	N	Ineligible.	1	0	0
PS_316			M	N	White	N	Ineligible.	1	0	0
PS_319			M	UNK	White	N	Ineligible.	1	0	0
PS_326			M	N	Other	N	Ineligible.	1	0	0
PS_328			M	UNK	White	N	Ineligible.	1	0	0
PS_329			M	N	White	N	Ineligible.	1	0	0
PS_330			F	N	White	N	Ineligible.	1	0	0
PS_332			M	N	White	N	Ineligible.	1	0	0
PS_335			M	UNK	White	N	Ineligible.	1	0	0
PS_337			M	N	White	N	Ineligible.	1	0	0
PS_338			M	N	White	N	Ineligible.	1	0	0
PS_341			F	N	White	N	Ineligible.	1	0	0
PS_345			M	N	White	N	Ineligible.	1	0	0
PS_351			F	UNK	White	N	Ineligible.	1	0	0
PS_352			F	N	Black	N	Ineligible.	1	0	0
PS_354			F	N	White	N	Ineligible.	1	0	0
PS_355			F	N	White	N	Ineligible.	1	0	0
PS_357			F	N	White	N	Ineligible.	1	0	0
PS_361			M	N	White	N	Ineligible.	1	0	0
PS_369			M	N	White	N	Ineligible.	1	0	0
PS_370			M	UNK	Asian	N	Ineligible.	1	0	0
PS_372			M	N	White	N	Ineligible.	1	0	0
PS_376			M	N	White	N	Ineligible.	1	0	0
PS_377			F	N	White	N	Ineligible.	1	0	0
PS_378			F	N	White	N	Ineligible.	1	0	0
PS_379			F	N	White	N	Ineligible.	1	0	0
PS_380			M	N	White	N	Ineligible.	1	0	0
PS_382			M	N	UNK	N	Ineligible.	1	0	0
PS_383			M	N	White	N	Ineligible.	1	0	0
PS_384			F	UNK	White	N	Ineligible.	1	0	0
PS_385			F	N	White	N	Ineligible.	1	0	0
PS_387			F	N	White	N	Ineligible.	1	0	0
PS_388			F	Y	Other	N	Ineligible.	1	0	0
PS_389			M	N	White	N	Ineligible.	1	0	0
PS_390			M	N	Asian	N	Ineligible.	1	0	0
PS_396			F	N	Asian	N	Ineligible.	1	0	0
PS_397			F	N	White	N	Ineligible.	1	0	0
PS_399			M	N	UNK	N	Ineligible.	1	0	0
PS_401			F	N	White	N	Ineligible.	1	0	0
PS_403			M	N	White	N	Ineligible.	1	0	0
PS_404			M	UNK	UNK	N	Ineligible.	1	0	0
PS_405			M	N	White	N	Ineligible.	1	0	0
PS_407			M	N	White	N	Ineligible.	1	0	0
PS_411			M	N	Other	N	Ineligible.	1	0	0
PS_412			F	N	White	N	Ineligible.	1	0	0
PS_413			M	N	White	N	Ineligible.	1	0	0
PS_416			M	N	White	N	Ineligible.	1	0	0
PS_417			F	N	White	N	Ineligible.	1	0	0
PS_418			F	N	White	N	Ineligible.	1	0	0
PS_419			M	UNK	White	N	Ineligible.	1	0	0
PS_420			M	N	White	N	Ineligible.	1	0	0
PS_421			M	N	White	N	Ineligible.	1	0	0
PS_427			M	N	White	N	Ineligible.	1	0	0
PS_429			F	N	White	N	Ineligible.	1	0	0
PS_431			M	N	White	N	Ineligible.	1	0	0
PS_432			F	N	Black	N	Ineligible.	1	0	0
PS_435			M	N	White	N	Ineligible.	1	0	0
PS_439			M	N	White	N	Ineligible.	1	0	0
PS_442			M	N	White	N	Ineligible.	1	0	0
PS_443			M	N	White	N	Ineligible.	1	0	0
PS_444			M	N	White	N	Ineligible.	1	0	0
PS_445			F	N	White	N	Ineligible.	1	0	0
PS_447			M	N	White	N	Ineligible.	1	0	0
PS_452			M	N	White	N	Ineligible.	1	0	0
PS_453			M	N	White	N	Ineligible.	1	0	0
PS_454			M	N	White	N	Ineligible.	1	0	0
PS_455			M	N	White	N	Ineligible.	1	0	0
PS_456			F	N	White	N	Ineligible.	1	0	0
PS_458			F	N	White	N	Ineligible.	1	0	0
PS_460			M	N	White	N	Ineligible.	1	0	0
PS_467			M	N	White	N	Ineligible.	1	0	0
PS_468			M	Y	Black	N	Ineligible.	1	0	0
PS_469			M	N	White	N	Ineligible.	1	0	0
PS_471			F	Y	White	N	Ineligible.	1	0	0
PS_472			F	N	White	N	Ineligible.	1	0	0
PS_474			M	N	White	N	Ineligible.	1	0	0
PS_475			M	N	White	N	Ineligible.	1	0	0
PS_476			M	N	White	N	Ineligible.	1	0	0
PS_477			M	N	White	N	Ineligible.	1	0	0
PS_478			F	N	White	N	Ineligible.	1	0	0
PS_479			F	N	White	N	Ineligible.	1	0	0
PS_480			M	N	White	N	Ineligible.	1	0	0
PS_481			F	N	White	N	Ineligible.	1	0	0
PS_482			M	N	Black	N	Ineligible.	1	0	0
PS_483			M	UNK	White	N	Ineligible.	1	0	0
PS_486			M	N	White	N	Ineligible.	1	0	0
PS_487			F	N	Black	N	Ineligible.	1	0	0
PS_488			M	N	White	N	Ineligible.	1	0	0
PS_489			M	N	White	N	Ineligible.	1	0	0
PS_492			F	N	White	N	Ineligible.	1	0	0
PS_496			M	N	Asian	N	Ineligible.	1	0	0
PS_497			F	N	White	N	Ineligible.	1	0	0
PS_503			F	Unk	Unk	N	Ineligible.	1	0	0
PS_504			M	N	White	N	Ineligible.	1	0	0
PS_508			M	N	White	N	Ineligible.	1	0	0
PS_511			M	N	White	N	Ineligible.	1	0	0
PS_512			F	N	White	N	Ineligible.	1	0	0
PS_513			F	N	White	N	Ineligible.	1	0	0
PS_518			M	N	White	N	Ineligible.	1	0	0
PS_519			F	N	White	N	Ineligible.	1	0	0
PS_520			M	N	White	N	Ineligible.	1	0	0
PS_524			M	N	White	N	Ineligible.	1	0	0
PS_526			M	N	White	N	Ineligible.	1	0	0
PS_528			M	N	White	N	Ineligible.	1	0	0
PS_529			F	N	White	N	Ineligible.	1	0	0
PS_530			M	Unk	Asian	N	Ineligible.	1	0	0
PS_531			M	Y	White	N	Ineligible.	1	0	0
PS_532			M	N	White	N	Ineligible.	1	0	0
PS_533			M	N	White	N	Ineligible.	1	0	0
PS_534			Unk	Unk	Unk	N	Ineligible.	1	0	0
PS_535			F	N	White	N	Ineligible.	1	0	0
PS_539			F	N	White	N	Ineligible.	1	0	0
PS_540			M	N	White	N	Ineligible.	1	0	0
PS_541			M	N	White	N	Ineligible.	1	0	0
PS_543			M	N	White	N	Ineligible.	1	0	0
PS_544			M	Unk	Unk	N	Ineligible.	1	0	0
PS_545			M	N	White	N	Ineligible.	1	0	0
PS_548			M	N	Black	N	Ineligible.	1	0	0
PS_549			M	N	White	N	Ineligible.	1	0	0
PS_550			M	N	White	N	Ineligible.	1	0	0
PS_551			M	N	White	N	Ineligible.	1	0	0
PS_555			F	N	White	N	Ineligible.	1	0	0
PS_556			F	N	White	N	Ineligible.	1	0	0
PS_563			F	N	White	N	Ineligible.	1	0	0
PS_565			F	N	White	N	Ineligible.	1	0	0
PS_566			M	N	White	N	Ineligible.	1	0	0
PS_567			M	Y	Unk	N	Ineligible.	1	0	0
PS_568			M	N	White	N	Ineligible.	1	0	0
PS_569			M	N	White	N	Ineligible.	1	0	0
PS_570			F	N	Black	N	Ineligible.	1	0	0
PS_571			M	N	White	N	Ineligible.	1	0	0
PS_572			F	N	Asian	N	Ineligible.	1	0	0
PS_573			M	N	White	N	Ineligible.	1	0	0
PS_574			F	N	White	N	Ineligible.	1	0	0
PS_575			M	N	White	N	Ineligible.	1	0	0
PS_581			F	N	White	N	Ineligible.	1	0	0
PS_582			F	N	White	N	Ineligible.	1	0	0
PS_584			M	N	White	N	Ineligible.	1	0	0
PS_585			M	N	White	N	Ineligible.	1	0	0
PS_586			F	N	Black	N	Ineligible.	1	0	0
PS_587			F	N	White	N	Ineligible.	1	0	0
PS_588			F	N	Asian	N	Ineligible.	1	0	0
PS_589			M	N	White	N	Ineligible.	1	0	0
PS_590			M	N	White	N	Ineligible.	1	0	0
PS_591			F	N	White	N	Ineligible.	1	0	0
PS_592			F	N	White	N	Ineligible.	1	0	0
PS_593			M	N	White	N	Ineligible.	1	0	0
PS_594			M	N	Asian	N	Ineligible.	1	0	0
PS_596			F	N	White	N	Ineligible.	1	0	0
PS_597			F	N	Black	N	Ineligible.	1	0	0
PS_600			M	N	White	N	Ineligible.	1	0	0
PS_601			M	N	White	N	Ineligible.	1	0	0
PS_602			F	Unk	White	N	Ineligible.	1	0	0
PS_603			M	N	White	N	Ineligible.	1	0	0
PS_606			M	N	White	N	Ineligible.	1	0	0
PS_607			F	Y	White	N	Ineligible.	1	0	0
PS_609			F	N	White	N	Ineligible.	1	0	0
PS_610			M	Y	White	N	Ineligible.	1	0	0
PS_614			F	N	White	N	Ineligible.	1	0	0
PS_616			M	N	White	N	Ineligible.	1	0	0
PS_617			F	N	White	N	Ineligible.	1	0	0
PS_619			F	N	White	N	Ineligible.	1	0	0
PS_624			F	N	White	N	Ineligible.	1	0	0
PS_626			M	N	Asian	N	Ineligible.	1	0	0
PS_627			F	N	White	N	Ineligible.	1	0	0
PS_628			F	N	White	N	Ineligible.	1	0	0
PS_629			F	N	White	N	Ineligible.	1	0	0
PS_630			M	N	White	N	Ineligible.	1	0	0
PS_631			M	N	White	N	Ineligible.	1	0	0
PS_632			F	N	White	N	Ineligible.	1	0	0
PS_639			M	Unk	White	N	Ineligible.	1	0	0
PS_641			F	N	White	N	Ineligible.	1	0	0
PS_643			F	N	Asian	N	Ineligible.	1	0	0
PS_644			F	N	White	N	Ineligible.	1	0	0
PS_651			F	N	White	N	Ineligible.	1	0	0
PS_652			F	N	White	N	Ineligible.	1	0	0
PS_653			M	N	White	N	Ineligible.	1	0	0
PS_654			M	N	White	N	Ineligible.	1	0	0
PS_655			M	N	White	N	Ineligible.	1	0	0
PS_656			M	N	White	N	Ineligible.	1	0	0
PS_663			M	N	Asian	N	Ineligible.	1	0	0
PS_664			M	Unk	White	N	Ineligible.	1	0	0
PS_665			M	N	White	N	Ineligible.	1	0	0
PS_666			F	N	White	N	Ineligible.	1	0	0
PS_668			F	N	White	N	Ineligible.	1	0	0
PS_669			F	Y	White	N	Ineligible.	1	0	0
PS_670			M	N	White	N	Ineligible.	1	0	0
PS_671			M	N	White	N	Ineligible.	1	0	0
PS_674			M	N	White	N	Ineligible.	1	0	0
PS_675			M	N	White	N	Ineligible.	1	0	0
PS_676			M	N	White	N	Ineligible.	1	0	0
PS_690			F	N	White	N	Ineligible.	1	0	0
PS_692			M	N	White	N	Ineligible.	1	0	0
PS_693			M	N	White	N	Ineligible.	1	0	0
PS_695			F	N	White	N	Ineligible.	1	0	0
PS_698			F	N	White	N	Ineligible.	1	0	0
PS_699			M	N	White	N	Ineligible.	1	0	0
PS_700			M	N	White	N	Ineligible.	1	0	0
PS_701			M	N	White	N	Ineligible.	1	0	0
PS_702			M	Y	White	N	Ineligible.	1	0	0
PS_707			M	N	White	N	Ineligible.	1	0	0
PS_710			F	N	White	N	Ineligible.	1	0	0
PS_717			F	Unk	White	N	Ineligible.	1	0	0
PS_723			M	N	White	N	Ineligible.	1	0	0
PS_724			M	N	Black	N	Ineligible.	1	0	0
PS_729			M	N	White	N	Ineligible.	1	0	0
PS_732			M	Y	White	N	Ineligible.	1	0	0
PS_733			M	N	White	N	Ineligible.	1	0	0
PS_739			F	N	White	N	Ineligible.	1	0	0
PS_740			M	N	White	N	Ineligible.	1	0	0
PS_741			F	N	Asian	N	Ineligible.	1	0	0
PS_745		71	M	N	White	Y	Ineligible.	1	0	0
PS_746			M	N	White	N	Ineligible.	1	0	0
PS_750			F	N	White	N	Ineligible.	1	0	0
PS_751			F	N	White	N	Ineligible.	1	0	0
PS_754			F	N	White	N	Ineligible.	1	0	0
PS_759			F	N	White	N	Ineligible.	1	0	0
PS_763			M	N	White	N	Ineligible.	1	0	0
PS_774			M	N	White	N	Ineligible.	1	0	0
PS_775			F	Y	Other	N	Ineligible.	1	0	0
PS_776			M	N	White	N	Ineligible.	1	0	0
PS_777			M	N	White	N	Ineligible.	1	0	0
PS_778			M	N	White	N	Ineligible.	1	0	0
PS_780			F	Unk	Black	N	Ineligible.	1	0	0
PS_781			F	N	White	N	Ineligible.	1	0	0
PS_783			F	N	White	N	Ineligible.	1	0	0
PS_784			F	N	White	N	Ineligible.	1	0	0
PS_796			M	N	White	N	Ineligible.	1	0	0
PS_800			M	N	White	N	Ineligible.	1	0	0
PS_801			M	N	White	N	Ineligible.	1	0	0
PS_802			F	N	White	N	Ineligible.	1	0	0
PS_803			M	N	White	N	Ineligible.	1	0	0
PS_804			F	N	White	N	Ineligible.	1	0	0
PS_805			M	N	White	N	Ineligible.	1	0	0
PS_810			M	N	White	N	Ineligible.	1	0	0
PS_814			M	N	White	N	Ineligible.	1	0	0
PS_816			F	Y	Unk	N	Ineligible.	1	0	0
PS_819			F	N	White	N	Ineligible.	1	0	0
PS_825			F	N	White	N	Ineligible.	1	0	0
PS_830			M	Y	White	N	Ineligible.	1	0	0
PS_831			F	N	White	N	Ineligible.	1	0	0
PS_832			M	N	White	N	Ineligible.	1	0	0
PS_833			M	N	White	N	Ineligible.	1	0	0
PS_837			M	Unk	White	N	Ineligible.	1	0	0
PS_842			M	N	White	N	Ineligible.	1	0	0
PS_843			M	N	White	N	Ineligible.	1	0	0
PS_844			M	N	White	N	Ineligible.	1	0	0
PS_845			F	N	White	N	Ineligible.	1	0	0
PS_851			M	N	Black	N	Ineligible.	1	0	0
PS_852			F	N	White	N	Ineligible.	1	0	0
PS_859			F	N	White	N	Ineligible.	1	0	0
PS_860			M	N	White	N	Ineligible.	1	0	0
PS_861			F	N	White	N	Ineligible.	1	0	0
PS_862			M	N	White	N	Ineligible.	1	0	0
PS_863			F	Unk	Unk	N	Ineligible.	1	0	0
PS_864			F	N	White	N	Ineligible.	1	0	0
PS_870			M	N	White	N	Ineligible.	1	0	0
PS_874			F	N	White	N	Ineligible.	1	0	0
PS_875			M	N	Other	N	Ineligible.	1	0	0
PS_876			M	N	Unk	N	Ineligible.	1	0	0
PS_879			F	N	White	N	Ineligible.	1	0	0
PS_880			M	N	White	N	Ineligible.	1	0	0
PS_882			M	N	White	N	Ineligible.	1	0	0
PS_883			F	Unk	White	N	Ineligible.	1	0	0
PS_884			F	N	White	N	Ineligible.	1	0	0
PS_888			M	Unk	White	N	Ineligible.	1	0	0
PS_892			F	Unk	White	N	Ineligible.	1	0	0
PS_897			M	N	Unk	N	Ineligible.	1	0	0
PS_899			F	N	White	N	Ineligible.	1	0	0
PS_902			F	N	White	N	Ineligible.	1	0	0
PS_903			F	N	White	N	Ineligible.	1	0	0
PS_909			M	N	White	N	Ineligible.	1	0	0
PS_921		69	M	N	White	N	Ineligible.	1	0	0
PS_928			M	N	White	N	Ineligible.	1	0	0
PS_929			M	Unk	White	N	Ineligible.	1	0	0
PS_930			F	Y	White	N	Ineligible.	1	0	0
PS_931			F	Unk	White	N	Ineligible.	1	0	0
PS_932			F	N	White	N	Ineligible.	1	0	0
PS_933			M	N	White	N	Ineligible.	1	0	0
PS_934			F	N	White	N	Ineligible.	1	0	0
PS_935			M	N	Other	N	Ineligible.	1	0	0
PS_936			F	Y	Other	N	Ineligible.	1	0	0
PS_937			M	Unk	White	N	Ineligible.	1	0	0
PS_940			M	N	White	N	Ineligible.	1	0	0
PS_941			M	N	White	N	Ineligible.	1	0	0
PS_942			F	N	White	N	Ineligible.	1	0	0
PS_956			M	N	White	N	Ineligible.	1	0	0
PS_959			F	Y	White	N	Ineligible.	1	0	0
PS_960			F	N	White	N	Ineligible.	1	0	0
PS_961			M	N	White	N	Ineligible.	1	0	0
PS_962			M	N	White	N	Ineligible.	1	0	0
PS_970			M	N	White	N	Ineligible.	1	0	0
PS_971			M	N	Asian/White	N	Ineligible.	1	0	0
PS_972			M	N	White	N	Ineligible.	1	0	0
PS_973			M	N	White	N	Ineligible.	1	0	0
PS_974			M	N	White	N	Ineligible.	1	0	0
PS_981			M	Y	Other	N	Ineligible.	1	0	0
PS_982			M	N	White	N	Ineligible.	1	0	0
PS_983			M	N	White	N	Ineligible.	1	0	0
PS_984			M	Unk	White	N	Ineligible.	1	0	0
PS_988			F	N	White	N	Ineligible.	1	0	0
PS_992			M	N	White	N	Ineligible.	1	0	0
PS_997			F	N	White	N	Ineligible.	1	0	0
PS_998			F	N	White	N	Ineligible.	1	0	0
PS_999			M	N	White	N	Ineligible.	1	0	0
PS_1000			M	N	Unknown	N	Ineligible.	1	0	0
PS_1009			M	N	Unknown	N	Ineligible.	1	0	0
PS_1010			F	Y	Other	N	Ineligible.	1	0	0
PS_1011			F	N	White	N	Ineligible.	1	0	0
PS_1012			M	N	White	N	Ineligible.	1	0	0
PS_1017			F	N	White	N	Ineligible.	1	0	0
PS_1018			M	N	White	N	Ineligible.	1	0	0
PS_1021			F	Unk	Unknown	N	Ineligible.	1	0	0
PS_1025			M	Unk	White	N	Ineligible.	1	0	0
PS_1026			M	N	White	N	Ineligible.	1	0	0
PS_1028			M	N	Black or African American	N	Ineligible.	1	0	0
PS_1036			F	N	White	N	Ineligible.	1	0	0
PS_1037			F	N	White	N	Ineligible.	1	0	0
PS_1038			F	N	White	N	Ineligible.	1	0	0
PS_1039			M	N	White	N	Ineligible.	1	0	0
PS_1040			M	N	White	N	Ineligible.	1	0	0
PS_1041			F	N	White	N	Ineligible.	1	0	0
PS_1046			M	N	White	N	Ineligible.	1	0	0
PS_1049			F	N	White	N	Ineligible.	1	0	0
PS_1054			F	N	White	N	Ineligible.	1	0	0
PS_1055			M	Unk	White	N	Ineligible.	1	0	0
PS_1056			F	Y	Other	N	Ineligible.	1	0	0
PS_1059			M	N	White	N	Ineligible.	1	0	0
PS_1062			F	N	White	N	Ineligible.	1	0	0
PS_1063			F	N	White	N	Ineligible.	1	0	0
PS_1068			F	N	White	N	Ineligible.	1	0	0
PS_1070			M	N	Unknown	N	Ineligible.	1	0	0
PS_1077			M	N	White	N	Ineligible.	1	0	0
PS_1081			M	N	Black or African American	N	Ineligible.	1	0	0
PS_1082			M	N	White	N	Ineligible.	1	0	0
PS_1083			F	N	White	N	Ineligible.	1	0	0
PS_1088			M	Unk	White	N	Ineligible.	1	0	0
PS_1090			F	N	White	N	Ineligible.	1	0	0
PS_1091			M	N	White	N	Ineligible.	1	0	0
PS_1092			M	N	Other	N	Ineligible.	1	0	0
PS_1093			M	N	White	N	Ineligible.	1	0	0
PS_1094			M	N	White	N	Ineligible.	1	0	0
PS_1095			F	N	White	N	Ineligible.	1	0	0
PS_1096			F	N	White	N	Ineligible.	1	0	0
PS_1103			M	N	White	N	Ineligible.	1	0	0
PS_1106			M	N	White	N	Ineligible.	1	0	0
PS_1107			M	N	White	N	Ineligible.	1	0	0
PS_1108			F	N	White	N	Ineligible.	1	0	0
PS_1113			F	N	White	N	Ineligible.	1	0	0
PS_1114			F	N	White	N	Ineligible.	1	0	0
PS_1115			M	Y	White	N	Ineligible.	1	0	0
PS_1116			M	N	White	N	Ineligible.	1	0	0
PS_1117			M	N	White	N	Ineligible.	1	0	0
PS_1118			M	N	White	N	Ineligible.	1	0	0
PS_1126			M	N	White	N	Ineligible.	1	0	0
PS_1127			M	N	White	N	Ineligible.	1	0	0
PS_1128			M	N	White	N	Ineligible.	1	0	0
PS_1135			M	N	White	N	Ineligible.	1	0	0
PS_1142			F	N	White	N	Ineligible.	1	0	0
PS_1143			F	N	White	N	Ineligible.	1	0	0
PS_1144			F	N	White	N	Ineligible.	1	0	0
PS_1149			F	N	White	N	Ineligible.	1	0	0
PS_1151			F	N	White	N	Ineligible.	1	0	0
PS_1152			M	Unk	White	N	Ineligible.	1	0	0
PS_1154			M	N	White	N	Ineligible.	1	0	0
PS_1158			M	N	White	N	Ineligible.	1	0	0
PS_1160			M	N	White	N	Ineligible.	1	0	0
PS_1161			M	N	White	N	Ineligible.	1	0	0
PS_1163			M	N	White	N	Ineligible.	1	0	0
PS_1164			F	N	White	N	Ineligible.	1	0	0
PS_1165			F	N	White	N	Ineligible.	1	0	0
PS_1166			F	N	White	N	Ineligible.	1	0	0
PS_1167			M	Unk	White	N	Ineligible.	1	0	0
PS_1176			F	N	White	N	Ineligible.	1	0	0
PS_1177			F	N	White	N	Ineligible.	1	0	0
PS_1178			F	N	White	N	Ineligible.	1	0	0
PS_1179			F	N	Other	N	Ineligible.	1	0	0
PS_1180			F	N	White	N	Ineligible.	1	0	0
PS_1181			M	N	White	N	Ineligible.	1	0	0
PS_1183			M	N	White	N	Ineligible.	1	0	0
PS_1187			F	N	White	N	Ineligible.	1	0	0
PS_1191			F	N	White	N	Ineligible.	1	0	0
PS_1192			M	N	White	N	Ineligible.	1	0	0
PS_1195			F	N	White	N	Ineligible.	1	0	0
PS_1197			F	N	White	N	Ineligible.	1	0	0
PS_1199			M	N	White	N	Ineligible.	1	0	0
PS_1200			M	N	White	N	Ineligible.	1	0	0
PS_1201			F	N	White	N	Ineligible.	1	0	0
PS_1202			M	N	White	N	Ineligible.	1	0	0
PS_1203			M	N	White	N	Ineligible.	1	0	0
PS_1204			F	N	Asian	N	Ineligible.	1	0	0
PS_1207			M	N	White	N	Ineligible.	1	0	0
PS_1210			M	N	White	N	Ineligible.	1	0	0
PS_1211			M	N	White	N	Ineligible.	1	0	0
PS_1212			M	N	White	N	Ineligible.	1	0	0
PS_1213			M	N	White	N	Ineligible.	1	0	0
PS_1216			F	N	White	N	Ineligible.	1	0	0
PS_1217			F	N	White	N	Ineligible.	1	0	0
PS_1220			M	Y	Hispanic or Latino	N	Ineligible.	1	0	0
PS_1224			M	N	White	N	Ineligible.	1	0	0
PS_1225			M	N	White	N	Ineligible.	1	0	0
PS_1226			M	Unk	White	N	Ineligible.	1	0	0
PS_1227			M	N	White	N	Ineligible.	1	0	0
PS_1228			M	N	White	N	Ineligible.	1	0	0
PS_1237			F	N	White	N	Ineligible.	1	0	0
PS_1241			M	N	Asian	N	Ineligible.	1	0	0
PS_1242			M	Unk	Unknown	N	Ineligible.	1	0	0
PS_1243			F	N	White	N	Ineligible.	1	0	0
PS_1245		67	M	N	White	Y	Ineligible.	1	0	0
PS_1246			F	N	White	N	Ineligible.	1	0	0
PS_1249			M	N	White	N	Ineligible.	1	0	0
PS_1251			F	Unk	Unknown	N	Ineligible.	1	0	0
PS_1252			M	Unk	Unknown	N	Ineligible.	1	0	0
PS_1254			M	N	White	N	Ineligible.	1	0	0
PS_1256			M	N	White	N	Ineligible.	1	0	0
PS_1257			F	Unk	White	N	Ineligible.	1	0	0
PS_1258			M	Unk	White	N	Ineligible.	1	0	0
PS_1262			F	N	White	N	Ineligible.	1	0	0
PS_1263			M	N	White	N	Ineligible.	1	0	0
PS_1264			M	N	White	N	Ineligible.	1	0	0
PS_1265			F	N	White	N	Ineligible.	1	0	0
PS_1270			M	N	White	N	Ineligible.	1	0	0
PS_1277			M	N	White	N	Ineligible.	1	0	0
PS_1281			M	N	White	N	Ineligible.	1	0	0
PS_1286			M	N	Black or African American	N	Ineligible.	1	0	0
PS_1289			F	N	White	N	Ineligible.	1	0	0
PS_1291			M	N	White	N	Ineligible.	1	0	0
PS_1294			M	N	White	N	Ineligible.	1	0	0
PS_1296			M	N	White	N	Ineligible.	1	0	0
PS_1298			M	N	White	N	Ineligible.	1	0	0
PS_1301			M	N	Other	N	Ineligible.	1	0	0
PS_1307			M	Y	White	N	Ineligible.	1	0	0
PS_1310			F	N	Other	N	Ineligible.	1	0	0
PS_1311			M	N	White	N	Ineligible.	1	0	0
PS_1314			M	N	White	N	Ineligible.	1	0	0
PS_1316			F	N	White	N	Ineligible.	1	0	0
PS_1318			M	N	White	N	Ineligible.	1	0	0
PS_1320			M	N	White	N	Ineligible.	1	0	0
PS_1321			M	N	White	N	Ineligible.	1	0	0
PS_1322			F	N	White	N	Ineligible.	1	0	0
PS_1323			M	N	White	N	Ineligible.	1	0	0
PS_1324			M	N	White	N	Ineligible.	1	0	0
PS_1327			M	N	White	N	Ineligible.	1	0	0
PS_1331			M	N	White	N	Ineligible.	1	0	0
PS_1333			F	Unk	White	N	Ineligible.	1	0	0
PS_1334			M	N	White	N	Ineligible.	1	0	0
PS_1335			M	N	White	N	Ineligible.	1	0	0
PS_1340			M	N	White	N	Ineligible.	1	0	0
PS_1343			M	N	White	N	Ineligible.	1	0	0
PS_1346			M	N	White	N	Ineligible.	1	0	0
PS_1347			M	N	Asian	N	Ineligible.	1	0	0
PS_1348			M	N	White	N	Ineligible.	1	0	0
PS_1349			F	N	White	N	Ineligible.	1	0	0
PS_1350			M	N	Black or African American	N	Ineligible.	1	0	0
PS_1352			M	N	White	N	Ineligible.	1	0	0
PS_1356			F	N	Black or African American	N	Ineligible.	1	0	0
PS_1358			M	N	White	N	Ineligible.	1	0	0
PS_1359			M	N	Black or African American	N	Ineligible.	1	0	0
PS_1360			M	N	White	N	Ineligible.	1	0	0
PS_1361			F	N	White	N	Ineligible.	1	0	0
PS_1362			F	N	White	N	Ineligible.	1	0	0
PS_1367			F	N	White	N	Ineligible.	1	0	0
PS_1369			M	N	White	N	Ineligible.	1	0	0
PS_1371			M	N	Black or African American	N	Ineligible.	1	0	0
PS_1372			F	N	White	N	Ineligible.	1	0	0
PS_1373			M	N	White	N	Ineligible.	1	0	0
PS_1374			F	N	White	N	Ineligible.	1	0	0
PS_1375			M	N	White	N	Ineligible.	1	0	0
PS_1376			F	N	White	N	Ineligible.	1	0	0
PS_1377			M	N	White	N	Ineligible.	1	0	0
PS_1382			M	N	White	N	Ineligible.	1	0	0
PS_1385			M	N	White	N	Ineligible.	1	0	0
PS_1386			M	N	Other	N	Ineligible.	1	0	0
PS_1388			F	N	White	N	Ineligible.	1	0	0
PS_1389			M	N	White	N	Ineligible.	1	0	0
PS_1391			M	N	White	N	Ineligible.	1	0	0
PS_1392			F	Unk	White	N	Ineligible.	1	0	0
PS_1393			M	N	White	N	Ineligible.	1	0	0
PS_1394			M	N	White	N	Ineligible.	1	0	0
PS_1397			M	N	White	N	Ineligible.	1	0	0
PS_1398			M	N	Asian	N	Ineligible.	1	0	0
PS_1403			F	N	Other	N	Ineligible.	1	0	0
PS_1407			F	N	White	N	Ineligible.	1	0	0
PS_1408			F	Y	Unknown	N	Ineligible.	1	0	0
PS_1409			M	N	White	N	Ineligible.	1	0	0
PS_1412			M	N	Unknown	N	Ineligible.	1	0	0
PS_1413			F	Y	White	N	Ineligible.	1	0	0
PS_1414			F	N	White	N	Ineligible.	1	0	0
PS_1416			F	N	White	N	Ineligible.	1	0	0
PS_1424			M	N	White	N	Ineligible.	1	0	0
PS_1428			M	N	White	N	Ineligible.	1	0	0
PS_1430			M	N	White	N	Ineligible.	1	0	0
PS_1431			M	N	White	N	Ineligible.	1	0	0
PS_1432			M	N	White	N	Ineligible.	1	0	0
PS_1433			F	N	White	N	Ineligible.	1	0	0
PS_1434			M	N	White	N	Ineligible.	1	0	0
PS_1435			M	N	White	N	Ineligible.	1	0	0
PS_1436			M	N	White	N	Ineligible.	1	0	0
PS_1437			M	N	White	N	Ineligible.	1	0	0
PS_1444			F	N	White	N	Ineligible.	1	0	0
PS_1445			F	N	White	N	Ineligible.	1	0	0
PS_1446			M	Unk	Unknown	N	Ineligible.	1	0	0
PS_1447			F	N	White	N	Ineligible.	1	0	0
PS_1448			M	N	White	N	Ineligible.	1	0	0
PS_1449			M	N	White	N	Ineligible.	1	0	0
PS_1450			M	N	White	N	Ineligible.	1	0	0
PS_1453			M	Y	Black or African American	N	Ineligible.	1	0	0
PS_1455			F	N	White	N	Ineligible.	1	0	0
PS_1462			F	N	White	N	Ineligible.	1	0	0
PS_1465			M	Unk	Unknown	N	Ineligible.	1	0	0
PS_1468			M	N	White	N	Ineligible.	1	0	0
PS_1470			F	Unk	White	N	Ineligible.	1	0	0
PS_1471			M	N	White	N	Ineligible.	1	0	0
PS_1473			M	N	White	N	Ineligible.	1	0	0
PS_1474			M	N	Unknown	N	Ineligible.	1	0	0
PS_1477			M	N	White	N	Ineligible.	1	0	0
PS_1478			F	N	White	N	Ineligible.	1	0	0
PS_1484			M	Y	Black or African American	N	Ineligible.	1	0	0
PS_1485			M	N	White	N	Ineligible.	1	0	0
PS_1491			F	N	White	N	Ineligible.	1	0	0
PS_1492			M	N	White	N	Ineligible.	1	0	0
PS_1493			M	Y	White	N	Ineligible.	1	0	0
PS_1494			M	N	White	N	Ineligible.	1	0	0
PS_1495			M	Unk	White	N	Ineligible.	1	0	0
PS_1496			F	N	White	N	Ineligible.	1	0	0
PS_1497			M	N	American Indian	N	Ineligible.	1	0	0
PS_1502			M	Y	White	N	Ineligible.	1	0	0
PS_1505			F	N	White	N	Ineligible.	1	0	0
PS_1506			M	Unk	White	N	Ineligible.	1	0	0
PS_1507			M	N	White	N	Ineligible.	1	0	0
PS_1508			M	N	White	N	Ineligible.	1	0	0
PS_1509			F	Unk	Unknown	N	Ineligible.	1	0	0
PS_1510			M	N	White	N	Ineligible.	1	0	0
PS_1516			F	N	White	N	Ineligible.	1	0	0
PS_1517			M	N	White	N	Ineligible.	1	0	0
PS_1518			M	N	White	N	Ineligible.	1	0	0
PS_1519			M	Unk	White	N	Ineligible.	1	0	0
PS_1522			M	N	White	N	Ineligible.	1	0	0
PS_1531			M	Unk	White	N	Ineligible.	1	0	0
PS_1536			M	Y	Other	N	Ineligible.	1	0	0
PS_1539			M	N	White	N	Ineligible.	1	0	0
PS_1540			M	N	White	N	Ineligible.	1	0	0
PS_1545			M	N	White	N	Ineligible.	1	0	0
PS_1546			M	N	White	N	Ineligible.	1	0	0
PS_1547			M	N	White	N	Ineligible.	1	0	0
PS_1548			F	N	White	N	Ineligible.	1	0	0
PS_1556			F	Y	Other	N	Ineligible.	1	0	0
PS_1557			F	N	Asian	N	Ineligible.	1	0	0
PS_1558			M	Y	Other	N	Ineligible.	1	0	0
PS_1563			F	N	White	N	Ineligibile.	1	0	0
PS_1570			F	N	White	N	Ineligible.	1	0	0
PS_1571			F	N	White	N	Ineligible.	1	0	0
PS_1572			M	N	White	N	Ineligible.	1	0	0
PS_1573			F	N	White	N	Ineligible.	1	0	0
PS_1574			M	Y	White	N	Ineligible.	1	0	0
PS_1587		69	M	Unk	Unknown	Y	Ineligible.	1	0	0
PS_1590			M	Y	Black or African American	N	Ineligible.	1	0	0
PS_1592			F	N	Other	N	Ineligible.	1	0	0
PS_1594			F	N	White	N	Ineligible.	1	0	0
PS_1595			M	N	White	N	Ineligible.	1	0	0
PS_1596			M	N	White	N	Ineligible.	1	0	0
PS_1597			M	N	White	N	Ineligible.	1	0	0
PS_1598			M	Unk	White	N	Ineligible.	1	0	0
PS_1599			M	N	White	N	Ineligible.	1	0	0
PS_1600			M	N	White	N	Ineligible.	1	0	0
PS_1608			M	N	White	N	Ineligible.	1	0	0
PS_1610			F	N	White	N	Ineligible.	1	0	0
PS_1611			M	N	White	N	Ineligible.	1	0	0
PS_1619			M	N	Asian	N	Ineligible.	1	0	0
PS_1621			M	N	White	N	Ineligible.	1	0	0
PS_1622			M	Unk	White	N	Ineligible.	1	0	0
PS_1623			M	N	White	N	Ineligible.	1	0	0
PS_1624			M	N	White	N	Ineligible.	1	0	0
PS_1625			F	N	White	N	Ineligible.	1	0	0
PS_1626			M	Unk	White	N	Ineligible.	1	0	0
PS_1635			F	N	White	N	Ineligible.	1	0	0
PS_1636			M	N	White	N	Ineligible.	1	0	0
PS_1644			M	N	White	N	Ineligible.	1	0	0
PS_1645			M	N	White	N	Ineligible.	1	0	0
PS_1647			M	N	Asian	N	Ineligible.	1	0	0
PS_1648			F	N	White	N	Ineligible.	1	0	0
PS_1649			F	N	White	N	Ineligible.	1	0	0
PS_1650			M	N	White	N	Ineligible.	1	0	0
PS_1651			M	N	Black or African American	N	Ineligible.	1	0	0
PS_1652			F	N	White	N	Ineligible.	1	0	0
PS_1653			F	N	White	N	Ineligible.	1	0	0
PS_1660			F	N	White	N	Ineligible.	1	0	0
PS_1663			M	Unk	White	N	Ineligible.	1	0	0
PS_1664			M	Unk	White	N	Ineligible.	1	0	0
PS_1665			M	N	White	N	Ineligible.	1	0	0
PS_1666			F	N	Other	N	Ineligible.	1	0	0
PS_1676			F	N	White	N	Ineligible.	1	0	0
PS_1678			F	N	White	N	Ineligible.	1	0	0
PS_1679			F	Unk	Unknown	N	Ineligible.	1	0	0
PS_1680			M	N	White	N	Ineligible.	1	0	0
PS_1681			M	Unk	Unknown	N	Ineligible.	1	0	0
PS_1692			F	N	White	N	Ineligible.	1	0	0
PS_1693			M	N	Black or African American	N	Ineligible.	1	0	0
PS_1694			M	N	White	N	Ineligible.	1	0	0
PS_1695			M	Y	Unknown	N	Ineligible.	1	0	0
PS_1696			M	N	White	N	Ineligible.	1	0	0
PS_1697			F	N	White	N	Ineligible.	1	0	0
PS_1700			F	N	White	N	Ineligible.	1	0	0
PS_1707			M	Unk	Unknown	N	Ineligible.	1	0	0
PS_1708			M	N	White	N	Ineligible.	1	0	0
PS_1709			F	N	White	N	Ineligible.	1	0	0
PS_1710			F	N	White	N	Ineligible.	1	0	0
PS_1712			M	N	White	N	Ineligible.	1	0	0
PS_1713			M	N	White	N	Ineligible.	1	0	0
PS_1720			F	Unk	Unknown	N	Ineligible.	1	0	0
PS_1721			M	N	White	N	Ineligible.	1	0	0
PS_1722			F	N	White	N	Ineligible.	1	0	0
PS_1723			M	N	White	N	Ineligible.	1	0	0
PS_1724			M	N	White	N	Ineligible.	1	0	0
PS_1725			M	N	White	N	Ineligible.	1	0	0
PS_1728			M	N	White	N	Ineligible.	1	0	0
PS_1729			M	N	White	N	Ineligible.	1	0	0
PS_1733			M	N	White	N	Ineligible.	1	0	0
PS_1734			M	N	White	N	Ineligible.	1	0	0
PS_1735			M	N	White	N	Ineligible.	1	0	0
PS_1736			M	N	White	N	Ineligible.	1	0	0
PS_1737			F	N	White	N	Ineligible.	1	0	0
PS_1738			M	N	White	N	Ineligible.	1	0	0
PS_1746			F	N	White	N	Ineligible.	1	0	0
PS_1747			F	N	White	N	Ineligible.	1	0	0
PS_1748			M	N	White	N	Ineligible.	1	0	0
PS_1749			M	N	White	N	Ineligible.	1	0	0
PS_1754		76	M	N	White	Y	Ineligible.	1	0	0
PS_1757			M	N	White	N	Ineligible.	1	0	0
PS_1758			M	N	White	N	Ineligible.	1	0	0
PS_1761			M	Unk	White	N	Ineligible.	1	0	0
PS_1762			M	N	White	N	Ineligible.	1	0	0
PS_1766			M	N	White	N	Ineligible.	1	0	0
PS_1770		68	F	N	White	Y	Patient completed baseline but surgery canceled and rescheduled for 1 year later. At time of rescheduled surgery patient deemed Ineligible.	1	0	0
PS_1772			M	N	White	N	Ineligible.	1	0	0
PS_1778			F	N	White	N	Ineligible.	1	0	0
PS_1779			M	N	White	N	Ineligible.	1	0	0
PS_1780			M	N	White	N	Ineligible.	1	0	0
PS_1781			M	N	White	N	Ineligible.	1	0	0
PS_1784			F	N	White	N	Ineligible.	1	0	0
PS_1787			F	N	White	N	Ineligible.	1	0	0
PS_1791			M	N	Unknown	N	Ineligible.	1	0	0
PS_1792			M	N	White	N	Ineligible.	1	0	0
PS_1793			M	Unk	White	N	Ineligible.	1	0	0
PS_1794			F	N	White	N	Ineligible.	1	0	0
PS_1795			F	N	Black or African American	N	Ineligible.	1	0	0
PS_1801			M	Y	Other	N	Ineligible.	1	0	0
PS_1802			M	N	White	N	Ineligible.	1	0	0
PS_1803			F	N	White	N	Ineligible.	1	0	0
PS_1804			F	N	White	N	Ineligible.	1	0	0
PS_1805			M	N	White	N	Ineligible.	1	0	0
PS_1806			M	N	White	N	Ineligible.	1	0	0
PS_1807			M	N	White	N	Ineligible.	1	0	0
PS_1808			M	N	White	N	Ineligible.	1	0	0
PS_1817			M	N	White	N	Ineligible.	1	0	0
PS_1818			F	Y	Other	N	Ineligible.	1	0	0
PS_1819			M	Unk	White	N	Ineligible.	1	0	0
PS_1823			M	N	White	N	Ineligible.	1	0	0
PS_1824			M	Unk	Unknown	N	Ineligible.	1	0	0
PS_1825			M	N	White	N	Ineligible.	1	0	0
PS_1826			M	Y	Unknown	N	Ineligible.	1	0	0
PS_1829			M	N	White	N	Ineligible.	1	0	0
PS_1830			M	Unk	White	N	Ineligible.	1	0	0
PS_1831			M	N	White	N	Ineligible.	1	0	0
PS_1837			M	N	White	N	Ineligible.	1	0	0
PS_1839			M	N	White	N	Ineligible.	1	0	0
PS_1840			F	N	White	N	Ineligible.	1	0	0
PS_1842			F	N	White	N	Ineligible.	1	0	0
PS_1844			F	N	White	N	Ineligible.	1	0	0
PS_1845			M	N	Unknown	N	Ineligible.	1	0	0
PS_1848			F	N	White	N	Ineligible.	1	0	0
PS_1855			M	Y	Unknown	N	Ineligible.	1	0	0
PS_1856			F	N	White	N	Ineligible.	1	0	0
PS_1857			M	Unk	White	N	Ineligible.	1	0	0
PS_1863			M	N	White	N	Ineligible.	1	0	0
PS_1864			M	N	White	N	Ineligible.	1	0	0
PS_1866			F	Y	Other	N	Ineligible.	1	0	0
PS_1867			M	N	White	N	Ineligible.	1	0	0
PS_1868			F	N	Other	N	Ineligible.	1	0	0
PS_1869			M	N	White	N	Ineligible.	1	0	0
PS_1870			F	N	White	N	Ineligible.	1	0	0
PS_1878			F	N	White	N	Ineligible.	1	0	0
PS_1879			F	N	White	N	Ineligible.	1	0	0
PS_1880			F	N	White	N	Ineligible.	1	0	0
PS_1881			F	N	White	N	Ineligible.	1	0	0
PS_1882			M	N	White	N	Ineligible.	1	0	0
PS_1885			F	N	White	N	Ineligible.	1	0	0
PS_1887			M	N	Asian	N	Ineligible.	1	0	0
PS_1892			M	Y	Unknown	N	Ineligible.	1	0	0
PS_1894			M	N	White	N	Ineligible.	1	0	0
PS_1895			F	N	White	N	Ineligible.	1	0	0
PS_1896			M	N	White	N	Ineligible.	1	0	0
PS_1897			M	N	White	N	Ineligible.	1	0	0
PS_1898			M	N	White	N	Ineligible.	1	0	0
PS_1900			M	N	White	N	Ineligible.	1	0	0
PS_1901			F	N	White	N	Ineligible.	1	0	0
PS_1906			F	N	White	N	Ineligible.	1	0	0
PS_1907			F	N	White	N	Ineligible.	1	0	0
PS_1908			F	N	White	N	Ineligible.	1	0	0
PS_1909			M	N	Asian	N	Ineligible.	1	0	0
PS_1910			M	N	White	N	Ineligible.	1	0	0
PS_1911			M	N	White	N	Ineligible.	1	0	0
PS_1914			F	N	White	N	Ineligible.	1	0	0
PS_1916		74	F	N	White	Y	Patient initially approached by conflicting study. Surgery Rescheduled and now Ineligible. (7/23/2020)	1	0	0
PS_1917			F	N	White	N	Ineligible.	1	0	0
PS_1920			M	N	White	N	Ineligible.	1	0	0
PS_1921			M	N	White	N	Ineligible.	1	0	0
PS_1922			M	N	White	N	Ineligible.	1	0	0
PS_1923			F	N	White	N	Ineligible.	1	0	0
PS_1931			M	N	White	N	Ineligible.	1	0	0
PS_1934			M	N	White	N	Ineligible.	1	0	0
PS_1935			F	N	White	N	Ineligible.	1	0	0
PS_1936			F	N	White	N	Ineligible.	1	0	0
PS_1937			F	N	White	N	Ineligible.	1	0	0
PS_1945			M	N	White	N	Ineligible.	1	0	0
PS_1946			F	N	White	N	Ineligible.	1	0	0
PS_1947			M	N	White	N	Ineligible.	1	0	0
PS_1952			F	N	White	N	Ineligible.	1	0	0
PS_308		69	F	N	White	Y	Patient completed baseline but admitted for cardiac cath and diuresis and no longer met inclusion criteria of same day admission.	0	0	3
PS_924			F	N	White	N	Ineligible.	0	0	3

## Sheet: Pre-COVID Approaches
PreScreen Subject #	Subject Study Number	Age	Sex	Ethnicity	Race	Met Eligibility Criteria (Y/N)	Reason for Exclusion/Screen Failure	Didn’t Approach: 1 - Ineligible, 2 - Approached by conflicting study, 3 - Other (left before could approach, PPE canceled, Surgery canceled, unable to approach due to corornavirus shutdown/covid exposure)	Said No: 1- No to participation (including when called for baseline), 2 - No to discussion, 3 - Other (maybe but unreachable, maybe but surgery canceled)	Said Yes: 1 - Participated, 2 - Yes and completed baseline but declined before or on DOS, 3 - Other (unrandomized, did not book open heart surgery at MGH, unreachable to complete baseline, coronavirus shutdown/covid exposure, surgery canceled after recruitment, enrolled in conflicting study, died before surgery)	Reason for Decline
PS_005	MINDDS_CARD_001	62	M	N	White	Y	n/a	0	0	1					Consented to enrollment
PS_020	MINDDS_CARD_002	61	M	N	White	Y	n/a	0	0	1
PS_021	MINDDS_NCARD_002	75	M	N	White	Y	n/a	0	0	1
PS_042	MINDDS_CARD_003	75	F	N	White	Y	n/a	0	0	1
PS_044	MINDDS_NCARD_001	67	M	N	White	Y	n/a	0	0	1
PS_067	MINDDS_CARD_004	62	M	N	White	Y	n/a	0	0	1
PS_084	MINDDS_CARD_005	66	F	N	White	Y	n/a	0	0	1
PS_095	MINDDS_CARD_006	62	M	N	White	Y	n/a	0	0	1
PS_096	MINDDS_CARD_007	60	F	N	White	Y	n/a	0	0	1
PS_099	MINDDS_CARD_010	72	F	N	White	Y	n/a	0	0	1
PS_108	MINDDS_CARD_008	77	M	N	White	Y	n/a	0	0	1
PS_110	MINDDS_CARD_012	82	M	N	White	Y	n/a	0	0	1
PS_114	MINDDS_CARD_009	76	M	N	White	Y	n/a	0	0	1
PS_123	MINDDS_CARD_016	70	F	N	White	Y	n/a	0	0	1
PS_125	MINDDS_CARD_011	63	M	UNK	White	Y	n/a	0	0	1
PS_139	MINDDS_CARD_013	86	M	N	White	Y	n/a	0	0	1
PS_143	MINDDS_CARD_014	73	F	N	White	Y	n/a	0	0	1
PS_144	MINDDS_CARD_015	65	F	N	White	Y	n/a	0	0	1
PS_159	MINDDS_CARD018	80	M	N	White	Y	n/a	0	0	1
PS_161	MINDDS_CARD_017	63	M	N	White	Y	n/a	0	0	1
PS_166	MINDDS_CARD_019	78	M	N	White	Y	n/a	0	0	1
PS_167	MINDDS_CARD_021	72	M	N	White	Y	n/a	0	0	1
PS_169	MINDDS_CARD_020	70	F	N	White	Y	n/a	0	0	1
PS_174	MINDDS_CARD_022	78	F	UNK	White	Y	n/a	0	0	1
PS_190	MINDDS_CARD_023	63	M	N	White	Y	n/a	0	0	1
PS_193	MINDDS_CARD_024	70	F	N	White	Y	n/a	0	0	1
PS_206	MINDDS_CARD_026	69	F	N	White	Y	n/a	0	0	1
PS_207	MINDDS_CARD_025	75	F	N	White	Y	n/a	0	0	1
PS_220	MINDDS_CARD_028	80	F	N	White	Y	n/a	0	0	1
PS_223	MINDDS_CARD_027	76	F	N	White	Y	n/a	0	0	1
PS_229	MINDDS_NCARD_003	76	M	N	White	Y	n/a	0	0	1
PS_237	MINDDS_NCARD_004	63	M	UNK	White	Y	n/a	0	0	1
PS_247	MINDDS_CARD_029	66	M	N	White	Y	n/a	0	0	1
PS_252	MINDDS_CARD_030	77	M	UNK	White	Y	n/a	0	0	1
PS_266	MINDDS_CARD_031	83	F	N	White	Y	n/a	0	0	1
PS_296	MINDDS_CARD_032	72	M	N	White	Y	n/a	0	0	1
PS_301	MINDDS_NCARD_005	62	F	N	White	Y	n/a	0	0	1
PS_315	MINDDS_NCARD_006	63	M	N	White	Y	n/a	0	0	1
PS_331	MINDDS_CARD_033	63	M	N	White	Y	n/a	0	0	1
PS_333	MINDDS_CARD_035	80	F	N	White	Y	n/a	0	0	1
PS_339	MINDDS_CARD_043	71	M	N	White	Y	Study team conducted baseline assessment under the impression that the patient was a different recruit based on direction from PPE clinic. Patient assessed for eligibility post baseline assessment.	0	0	1
PS_342	MINDDS_CARD_034	64	M	N	White	Y	n/a	0	0	1
PS_343	MINDDS_CARD_037	73	F	N	White	Y	n/a	0	0	1
PS_344	MINDDS_CARD_036	67	M	N	White	Y	n/a	0	0	1
PS_347	MINDDS_CARD_040	82	F	N	White	Y	n/a	0	0	1
PS_356	MINDDS_CARD_044	66	M	N	White	Y	n/a	0	0	1
PS_358	MINDDS_NCARD_007	68	M	N	White	Y	n/a	0	0	1
PS_362	MINDDS_CARD_042	65	M	N	White	Y	n/a	0	0	1
PS_366	MINDDS_CARD_038	62	F	N	White	Y	n/a	0	0	1
PS_367	MINDDS_CARD_039	77	M	N	White	Y	n/a	0	0	1
PS_368	MINDDS_CARD_041	80	F	N	White	Y	n/a	0	0	1
PS_375	MINDDS_CARD_047	67	M	N	White	Y	n/a	0	0	1
PS_394	MINDDS_NCARD_009	76	M	N	White	Y	n/a	0	0	1
PS_398	MINDDS_CARD_046	75	M	N	White	Y	n/a	0	0	1
PS_400	MINDDS_CARD_045	70	M	UNK	White	Y	n/a	0	0	1
PS_402	MINDDS_NCARD_008	63	M	UNK	White	Y	n/a	0	0	1
PS_410	MINDDS_CARD_048	87	M	N	White	Y	n/a	0	0	1
PS_422	MINDDS_CARD_049	80	M	N	White	Y	n/a	0	0	1
PS_426	MINDDS_CARD_055	62	M	N	Asian	Y	n/a	0	0	1
PS_433	MINDDS_CARD_051	62	M	N	White	Y	n/a	0	0	1
PS_434	MINDDS_CARD_050	77	M	N	White	Y	Patient was randomized but censored due to intubation >12 hours.	0	0	1
PS_437	MINDDS_CARD_053	63	F	N	White	Y	n/a	0	0	1
PS_438	MINDDS_CARD_054	86	M	N	White	Y	n/a	0	0	1
PS_440	MINDDS_CARD_052	70	M	N	White	Y	n/a	0	0	1
PS_448	MINDDS_CARD_057	70	M	N	White	Y	n/a	0	0	1
PS_449	MINDDS_CARD_058	79	M	N	White	Y	n/a	0	0	1
PS_457	MINDDS_CARD_056	67	F	N	White	Y	Patient withdrew on POD 2 AM due to side effects she thought to be caused by study drug.	0	0	1
PS_463	MINDDS_CARD_059	62	M	UNK	White	Y	n/a	0	0	1
PS_473	MINDDS_CARD_061	66	M	N	White	Y	n/a	0	0	1
PS_484	MINDDS_CARD_063	62	F	N	White	Y	n/a	0	0	1
PS_499	MINDDS_CARD_062	80	F	N	White	Y	n/a	0	0	1
PS_501	MINDDS_CARD_060	61	M	N	White	Y	Patient withdrew on POD1 due to finding out that the drug decreased his blood pressure.	0	0	1
PS_502	MINDDS_NCARD_010	60	M	Unk	White	Y	n/a	0	0	1
PS_509	MINDDS_CARD_071	65	M	N	White	Y	n/a	0	0	1
PS_515	MINDDS_CARD_065	72	M	N	White	Y	n/a	0	0	1
PS_525	MINDDS_NCARD_011	73	M	N	White	Y	n/a	0	0	1
PS_527	MINDDS_CARD_064	74	F	N	White	Y	Patient's surgery was canceled.	0	0	1
PS_537	MINDDS_CARD_066	63	M	N	White	Y	n/a	0	0	1
PS_542	MINDDS_NCARD_014	60	M	N	White	Y	Patient unenrolled as they were intubated for more than 12 hours.	0	0	1
PS_554	MINDDS_NCARD_012	69	M	N	White	Y	n/a	0	0	1
PS_557	MINDDS_CARD_069	73	M	N	White	Y	Patient was unenrolled as they were intubated for more than 12 hours.	0	0	1
PS_560	MINDDS_CARD_068	76	M	N	White	Y	n/a	0	0	1
PS_577	MINDDS_CARD_067	69	F	N	White	Y	n/a	0	0	1
PS_579	MINDDS_NCARD_013	66	M	N	White	Y	Patient was unenrolled due to a second surgery.	0	0	1
PS_583	MINDDS_CARD_070	67	M	N	White	Y	n/a	0	0	1
PS_598	MINDDS_CARD_072	76	M	N	White	Y	n/a	0	0	1
PS_599	MINDDS_CARD_073	61	F	N	White	Y	n/a	0	0	1
PS_618	MINDDS_CARD_074	60	F	N	White	Y	n/a	0	0	1
PS_622	MINDDS_CARD_075	80	M	N	White	Y	n/a	0	0	1
PS_648	MINDDS_NCARD_015	72	M	N	White	Y	Patient was extubated more than 12 hrs after surgery, censored	0	0	1
PS_650	MINDDS_NCARD_016	67	M	N	White	Y		0	0	1
PS_660	MINDDS_NCARD_017	70	M	N	White	Y	n/a	0	0	1
PS_672	MINDDS_CARD_078	73	M	N	White	Y		0	0	1
PS_673	MINDDS_NCARD_018	65	M	N	White	Y		0	0	1
PS_679	MINDDS_CARD_080	69	M	N	White	Y		0	0	1
PS_683	MINDDS_CARD_077	62	M	N	White	Y		0	0	1
PS_684	MINDDS_CARD_076	64	M	N	White	Y		0	0	1
PS_688	MINDDS_NCARD_019	73	M	Unk	White	Y		0	0	1
PS_691	MINDDS_CARD_079	80	F	N	White	Y		0	0	1
PS_697	MINDDS_NCARD_020	73	M	N	White	Y	Patient consented and will complete baseline over the phone, attempted 4/18,4/19,4/23	0	0	1
PS_703	MINDDS_CARD_084	61	M	N	White	Y		0	0	1
PS_712	MINDDS_CARD_081	78	F	N	White	Y		0	0	1
PS_716	MINDDS_NCARD_021	73	M	N	White	Y		0	0	1
PS_719	MINDDS_CARD_096	82	F	N	White	Y		0	0	1
PS_720	MINDDS_CARD_085	75	F	N	White	Y		0	0	1
PS_721	MINDDS_CARD_086	74	M	N	White	Y		0	0	1
PS_726	MINDDS_NCARD_022	60	M	N	White	Y		0	0	1
PS_735	MINDDS_CARD_083	79	F	N	White	Y		0	0	1
PS_737	MINDDS_CARD_082	80	F	N	White	Y		0	0	1
PS_757	MINDDS_CARD_088	79	F	N	White	Y		0	0	1
PS_758	MINDDS_CARD_090	62	F	N	White	Y		0	0	1
PS_760	MINDDS_NCARD_023	61	M	Unk	White	Y		0	0	1
PS_765	MINDDS_NCARD_024	69	M	N	White	Y		0	0	1
PS_767	MINDDS_CARD_093	83	F	Unk	Unk	Y		0	0	1
PS_768	MINDDS_CARD_087	72	M	N	White	Y		0	0	1
PS_769	MINDDS_CARD_092	69	M	N	White	Y		0	0	1
PS_770	MINDDS_CARD_091	68	M	N	White	Y		0	0	1
PS_771	MINDDS_CARD_089	68	F	N	White	Y		0	0	1
PS_786	MINDDS_CARD_095	76	M	N	White	Y		0	0	1
PS_795	MINDDS_CARD_097	67	F	N	White	Y		0	0	1
PS_809	MINDDS_CARD_098	75	F	N	White	Y		0	0	1
PS_812	MINDDS_CARD_104	66	F	N	White	Y		0	0	1
PS_817	MINDDS_CARD_094	75	F	Unk	White	Y		0	0	1
PS_824	MINDDS_CARD_106	72	M	N	White	Y		0	0	1
PS_827	MINDDS_CARD_099	76	M	N	White	Y		0	0	1
PS_828	MINDDS_CARD_101	62	M	N	Unk	Y		0	0	1
PS_829	MINDDS_CARD_100	77	M	N	White	Y		0	0	1
PS_834	MINDDS_NCARD_025	64	M	N	White	Y		0	0	1
PS_839	MINDDS_CARD_102	73	F	Unk	White	Y		0	0	1
PS_848	MINDDS_CARD_105	77	M	N	White	Y		0	0	1
PS_854	MINDDS_CARD_103	68	M	N	White	Y		0	0	1
PS_869	MINDDS_NCARD_026	64	M	N	White	Y		0	0	1
PS_871	MINDDS_CARD_114	79	F	Unk	White	Y		0	0	1
PS_885	MINDDS_CARD_107	74	M	N	White	Y		0	0	1
PS_890	MINDDS_NCARD_027	63	M	N	White	Y		0	0	1
PS_891	MINDDS_CARD_113	69	M	Unk	Unk	Y		0	0	1
PS_894	MINDDS_CARD_108	69	M	Unk	White	Y		0	0	1
PS_895	MINDDS_CARD_112	81	M	N	White	Y		0	0	1
PS_904	MINDDS_CARD_111	71	M	Unk	Unk	Y		0	0	1
PS_908	MINDDS_NCARD_029	67	M	N	White	Y		0	0	1
PS_911	MINDDS_CARD_109	61	M	N	White	Y		0	0	1
PS_917	MINDDS_NCARD_028	70	M	N	White	Y		0	0	1
PS_922	MINDDS_CARD_128	69	M	Unk	White	Y		0	0	1
PS_925	MINDDS_CARD_110	60	M	N	White	Y		0	0	1
PS_926	MINDDS_CARD_115	61	M	N	White	Y		0	0	1
PS_927	MINDDS_CARD_116	66	M	N	White	Y		0	0	1
PS_943	MINDDS_CARD_123	60	M	N	Unk	Y	Patient canceled surgery but according to note, plans to reschedule.	0	0	1
PS_944	MINDDS_NCARD_030	62	M	N	White	Y		0	0	1
PS_946	MINDDS_CARD_120	70	M	N	White	Y		0	0	1
PS_949	MINDDS_CARD_117	75	M	N	White	Y		0	0	1
PS_955	MINDDS_CARD_122	72	F	N	White	Y		0	0	1
PS_958	MINDDS_CARD_124	60	M	N	White	Y		0	0	1
PS_966	MINDDS_CARD_121	70	F	N	White	Y		0	0	1
PS_967	MINDDS_CARD_118	70	M	N	White	Y		0	0	1
PS_968	MINDDS_CARD_125	71	M	N	White	Y		0	0	1
PS_975	MINDDS_NCARD_031	64	M	Y	Other	Y		0	0	1
PS_976	MINDDS_CARD_119	67	F	N	White	Y		0	0	1
PS_980	MINDDS_CARD_126	69	M	N	White	Y		0	0	1
PS_985	MINDDS_CARD_127	60	M	Unk	White	Y		0	0	1
PS_993	MINDDS_CARD_135	65	F	N	White	Y		0	0	1
PS_994	MINDDS_CARD_133	67	M	N	White	Y	No blood was drawn POD1 due to removal of all lines.	0	0	1
PS_995	MINDDS_CARD_134	81	M	N	White	Y		0	0	1
PS_1001	MINDDS_NCARD_032	64	M	Unk	White	Y		0	0	1
PS_1007	MINDDS_NCARD_034	78	M	Unk	White	Y		0	0	1
PS_1013	MINDDS_CARD_132	62	F	N	White	Y		0	0	1
PS_1015	MINDDS_NCARD_033	64	M	Unk	Asian	Y		0	0	1
PS_1019	MINDDS_CARD_131	70	F	N	White	Y		0	0	1
PS_1020	MINDDS_CARD_129	70	M	N	White	Y		0	0	1
PS_1022	MINDDS_CARD_130	74	M	N	White	Y		0	0	1
PS_1045	MINDDS_CARD_174	69	M	N	White	Y		0	0	1
PS_1047	MINDDS_CARD_137	82	M	N	White	Y		0	0	1
PS_1048	MINDDS_CARD_138	84	F	N	White	Y		0	0	1
PS_1051	MINDDS_CARD_136	73	F	N	White	Y		0	0	1
PS_1058	MINDDS_CARD_139	67	F	N	Other	Y		0	0	1
PS_1060	MINDDS_NCARD_035	68	M	N	White	Y		0	0	1
PS_1064	MINDDS_CARD_141	63	F	Unk	White	Y		0	0	1
PS_1065	MINDDS_CARD_140	63	M	N	White	Y		0	0	1
PS_1071	MINDDS_NCARD_036	62	M	N	White	Y		0	0	1
PS_1072	MINDDS_CARD_146	60	M	N	White	Y		0	0	1
PS_1074	MINDDS_NCARD_037	66	M	N	White	Y		0	0	1
PS_1076	MINDDS_NCARD_039	78	F	N	White	Y		0	0	1
PS_1079	MINDDS_CARD_142	70	M	N	Other	Y		0	0	1
PS_1086	MINDDS_CARD_143	67	F	N	White	Y		0	0	1
PS_1089	MINDDS_CARD_144	77	M	N	White	Y		0	0	1
PS_1097	MINDDS_CARD_147	61	F	Unk	White	Y		0	0	1
PS_1098	MINDDS_NCARD_038	65	M	N	White	Y		0	0	1
PS_1111	MINDDS_CARD_145	69	F	N	White	Y		0	0	1
PS_1119	MINDDS_NCARD_040	66	M	N	White	Y		0	0	1
PS_1121	MINDDS_CARD_149	69	M	N	Unknown	Y		0	0	1
PS_1123	MINDDS_CARD_155	74	M	N	Asian	Y		0	0	1
PS_1129	MINDDS_NCARD_041	62	M	N	White	Y		0	0	1
PS_1130	MINDDS_CARD_148	62	M	N	White	Y		0	0	1
PS_1133	MINDDS_CARD_151	68	M	N	White	Y		0	0	1
PS_1136	MINDDS_CARD_154	73	F	N	White	Y		0	0	1
PS_1137	MINDDS_CARD_152	76	M	N	White	Y		0	0	1
PS_1140	MINDDS_NCARD_042	69	M	N	White	Y		0	0	1
PS_1146	MINDDS_CARD_160	69	M	N	White	Y		0	0	1
PS_1155	MINDDS_CARD_156	67	M	Unk	Unknown	Y		0	0	1
PS_1156	MINDDS_CARD_158	69	M	N	White	Y		0	0	1
PS_1159	MINDDS_CARD_153	75	M	N	White	Y		0	0	1
PS_1162	MINDDS_CARD_150	63	F	Unk	Unknown	Y		0	0	1
PS_1168	MINDDS_CARD_157	70	F	N	White	Y		0	0	1
PS_1174	MINDDS_CARD_159	78	M	N	White	Y		0	0	1
PS_1182	MINDDS_NCARD_045	60	M	N	White	Y		0	0	1
PS_1186	MINDDS_NCARD_043	69	M	N	White	Y		0	0	1
PS_1188	MINDDS_NCARD_044	70	M	Unk	White	Y		0	0	1
PS_1196	MINDDS_CARD_163	75	F	N	White	N		0	0	1
PS_1205	MINDDS_CARD_164	74	F	N	White	Y		0	0	1
PS_1206	MINDDS_CARD_161	69	F	N	White	Y		0	0	1
PS_1219	MINDDS_CARD_165	66	M	N	White	Y		0	0	1
PS_1223	MINDDS_CARD_162	75	M	N	White	Y		0	0	1
PS_1229	MINDDS_CARD_166	60	F	Unk	White	Y		0	0	1
PS_1230	MINDDS_CARD_168	60	F	N	White	Y		0	0	1
PS_1231	MINDDS_NCARD_046	61	M	Unk	White	Y		0	0	1
PS_1233	MINDDS_NCARD_047	66	M	N	White	Y		0	0	1
PS_1234	MINDDS_NCARD_048	68	M	Unk	Unknown	Y		0	0	1
PS_1238	MINDDS_CARD_175	85	M	N	White	Y		0	0	1
PS_1239	MINDDS_CARD_167	61	M	N	White	Y		0	0	1
PS_1247	MINDDS_CARD_170	66	M	N	White	Y		0	0	1
PS_1250	MINDDS_CARD_171	76	M	N	White	Y		0	0	1
PS_1255	MINDDS_CARD_172	76	M	N	White	Y		0	0	1
PS_1259	MINDDS_NCARD_049	69	F	N	White	Y		0	0	1
PS_1267	MINDDS_CARD_177	63	M	N	White	Y		0	0	1
PS_1269	MINDDS_NCARD_050	75	M	N	White	Y		0	0	1
PS_1271	MINDDS_CARD_169	65	F	N	White	Y		0	0	1
PS_1273	MINDDS_CARD_173	75	M	N	White	Y		0	0	1
PS_1278	MINDDS_CARD_176	70	M	N	White	Y		0	0	1
PS_1285	MINDDS_NCARD_051	67	M	N	White	Y		0	0	1
PS_1297	MINDDS_CARD_186	71	F	N	White	Y		0	0	1
PS_1299	MINDDS_CARD_178	63	M	N	White	Y		0	0	1
PS_1304	MINDDS_CARD_182	60	M	N	White	Y		0	0	1
PS_1305	MINDDS_CARD_187	68	M	N	White	Y		0	0	1
PS_1306	MINDDS_CARD_179	72	F	N	White	Y		0	0	1
PS_1312	MINDDS_CARD_181	68	F	Unk	White	Y		0	0	1
PS_1315	MINDDS_CARD_180	78	M	N	White	Y		0	0	1
PS_1328	MINDDS_CARD_183	76	M	N	White	Y		0	0	1
PS_1336	MINDDS_CARD_185	75	M	N	White	Y		0	0	1
PS_1337	MINDDS_NCARD_053	60	M	N	White	Y	Patient said yes and completed baseline.	0	0	1
PS_1338	MINDDS_CARD_184	78	F	N	Unknown	Y		0	0	1
PS_1351	MINDDS_CARD_188	60	M	N	White	Y		0	0	1
PS_1353	MINDDS_NCARD_052	65	M	N	White	Y		0	0	1
PS_1363	MINDDS_CARD_191	62	M	Unk	White	Y		0	0	1
PS_1368	MINDDS_CARD_189	80	M	N	White	Y		0	0	1
PS_1379	MINDDS_CARD_351	73	F	N	White	Y		0	0	1
PS_1381	MINDDS_CARD_190	75	M	N	White	Y		0	0	1
PS_1383	MINDDS_CARD_192	70	M	N	White	Y		0	0	1
PS_1387	MINDDS_NCARD_054	78	M	N	White	Y		0	0	1
PS_1410	MINDDS_CARD_193	65	F	N	White	Y		0	0	1
PS_1411	MINDDS_CARD_194	64	F	N	White	Y		0	0	1
PS_1419	MINDDS_CARD_201	80	M	N	White	Y		0	0	1
PS_1420	MINDDS_CARD_200	78	M	N	White	Y		0	0	1
PS_1425	MINDDS_CARD_199	70	M	N	White	Y		0	0	1
PS_1429	MINDDS_CARD_195	63	M	N	White	Y		0	0	1
PS_1438	MINDDS_CARD_198	74	M	N	White	Y		0	0	1
PS_1439	MINDDS_CARD_197	74	M	N	White	Y		0	0	1
PS_1442	MINDDS_CARD_196	75	M	N	White	Y		0	0	1
PS_1457	MINDDS_NCARD_055	68	M	N	Asian	Y		0	0	1
PS_1459	MINDDS_CARD_206	60	M	N	White	Y		0	0	1
PS_1464	MINDDS_NCARD_057	65	F	Unk	White	Y		0	0	1
PS_1472	MINDDS_NCARD_056	66	M	N	White	Y		0	0	1
PS_1475	MINDDS_CARD_204	78	F	N	White	Y		0	0	1
PS_1476	MINDDS_CARD_203	76	M	N	White	Y		0	0	1
PS_1482	MINDDS_CARD_202	75	M	N	White	Y		0	0	1
PS_1483	MINDDS_CARD_207	75	M	N	White	Y		0	0	1
PS_1488	MINDDS_CARD_205	69	M	N	White	Y		0	0	1
PS_1500	MINDDS_CARD_212	65	M	N	White	Y		0	0	1
PS_1503	MINDDS_CARD_208	71	M	Unk	Unknown	Y		0	0	1
PS_1513	MINDDS_CARD_211	62	M	N	White	Y		0	0	1
PS_1514	MINDDS_CARD_210	71	M	N	White	Y		0	0	1
PS_1515	MINDDS_CARD_209	73	M	N	White	Y		0	0	1
PS_1525	MINDDS_CARD_217	62	F	N	White	Y		0	0	1
PS_1527	MINDDS_CARD_213	73	M	N	White	Y		0	0	1
PS_1529	MINDDS_CARD_214	76	F	N	White	Y		0	0	1
PS_1532	MINDDS_CARD_215	61	F	N	White	Y		0	0	1
PS_1533	MINDDS_NCARD_058	64	M	N	White	Y		0	0	1
PS_1534	MINDDS_CARD_216	64	M	N	White	Y		0	0	1
PS_1541	MINDDS_CARD_218	68	F	N	White	Y		0	0	1
PS_1554	MINDDS_CARD_219	74	M	N	White	Y		0	0	1
PS_1559	MINDDS_CARD_222	61	M	N	White	Y		0	0	1
PS_1562	MINDDS_CARD_226	65	M	Unk	White	Y		0	0	1
PS_1564	MINDDS_CARD_221	67	F	N	White	Y		0	0	1
PS_1567	MINDDS_CARD_223	73	M	N	White	Y		0	0	1
PS_1568	MINDDS_CARD_224	80	F	N	White	Y		0	0	1
PS_1569	MINDDS_CARD_220	86	F	N	White	Y		0	0	1
PS_1582	MINDDS_CARD_227	86	F	Unk	White	Y		0	0	1
PS_1586	MINDDS_CARD_225	69	M	N	White	Y		0	0	1
PS_1589	MINDDS_CARD_228	70	F	N	White	Y		0	0	1
PS_1591	MINDDS_CARD_231	74	F	N	White	Y		0	0	1
PS_1593	MINDDS_NCARD_059	76	M	N	White	Y		0	0	1
PS_1601	MINDDS_NCARD_060	60	F	N	White	Y		0	0	1
PS_1602	MINDDS_CARD_229	62	M	N	White	Y		0	0	1
PS_1605	MINDDS_CARD_230	75	F	N	White	Y		0	0	1
PS_1609	MINDDS_CARD_232	77	F	Unk	White	Y		0	0	1
PS_1612	MINDDS_CARD_234	66	F	N	White	Y		0	0	1
PS_1613	MINDDS_NCARD_062	67	M	N	White	Y		0	0	1
PS_1614	MINDDS_CARD_239	67	M	N	White	Y		0	0	1
PS_1616	MINDDS_CARD_233	69	M	Unk	Unknown	Y		0	0	1
PS_1627	MINDDS_CARD_235	63	M	N	White	Y		0	0	1
PS_1628	MINDDS_NCARD_061	64	M	N	White	Y		0	0	1
PS_1629	MINDDS_CARD_236	64	F	N	White	Y		0	0	1
PS_1630	MINDDS_CARD_238	66	M	N	White	Y		0	0	1
PS_1633	MINDDS_CARD_246	75	M	N	White	Y		0	0	1
PS_1637	MINDDS_CARD_267	60	M	N	White	Y		0	0	1
PS_1638	MINDDS_CARD_237	63	M	N	White	Y		0	0	1
PS_1639	MINDDS_NCARD_063	63	M	N	White	Y		0	0	1
PS_1655	MINDDS_CARD_242	66	M	N	White	Y		0	0	1
PS_1656	MINDDS_CARD_241	68	F	N	White	Y		0	0	1
PS_1659	MINDDS_CARD_240	77	M	N	White	Y		0	0	1
PS_1668	MINDDS_CARD_245	65	M	N	White	Y		0	0	1
PS_1673	MINDDS_CARD_243	77	M	N	White	Y		0	0	1
PS_1674	MINDDS_CARD_250	78	F	N	White	Y		0	0	1
PS_1677	MINDDS_NCARD_064	72	M	N	Unknown	Y		0	0	1
PS_1682	MINDDS_CARD_249	60	F	N	White	Y		0	0	1
PS_1685	MINDDS_CARD_254	63	M	N	White	Y		0	0	1
PS_1688	MINDDS_CARD_244	69	F	N	White	Y		0	0	1
PS_1689	MINDDS_CARD_248	76	F	N	White	Y		0	0	1
PS_1690	MINDDS_CARD_247	79	M	N	Unknown	Y		0	0	1
PS_1698	MINDDS_CARD_251	62	F	N	White	Y		0	0	1
PS_1702	MINDDS_NCARD_065	73	M	Unk	White	Y		0	0	1
PS_1703	MINDDS_CARD_253	73	F	N	White	Y		0	0	1
PS_1704	MINDDS_CARD_273	78	M	N	White	Y		0	0	1
PS_1705	MINDDS_CARD_252	83	F	N	White	Y		0	0	1
PS_1706	MINDDS_NCARD_066	83	M	N	White	Y		0	0	1
PS_1715	MINDDS_CARD_256	65	M	N	White	Y	Patient withdrew from the study on POD2AM	0	0	1
PS_1719	MINDDS_CARD_260	66	M	Unk	White	Y		0	0	1
PS_1726	MINDDS_CARD_257	61	M	N	White	Y		0	0	1
PS_1727	MINDDS_CARD_258	68	M	Unk	Unknown	Y		0	0	1
PS_1730	MINDDS_CARD_255	71	M	N	White	Y		0	0	1
PS_1731	MINDDS_CARD_261	66	M	N	White	Y		0	0	1
PS_1732	MINDDS_CARD_259	76	F	N	White	Y		0	0	1
PS_1756	MINDDS_CARD_262	63	M	N	Unknown	Y		0	0	1
PS_1760	MINDDS_CARD_265	67	M	N	White	Y		0	0	1
PS_1763	MINDDS_CARD_268	69	M	N	White	Y		0	0	1
PS_1765	MINDDS_CARD_264	72	F	N	White	Y		0	0	1
PS_1768	MINDDS_CARD_263	84	F	N	White	Y		0	0	1
PS_1771	MINDDS_NCARD_067	67	M	N	White	Y		0	0	1
PS_1773	MINDDS_CARD_266	70	F	Unk	White	Y		0	0	1
PS_1776	MINDDS_NCARD_068	66	M	N	White	Y		0	0	1
PS_1796	MINDDS_CARD_269	64	M	N	White	Y		0	0	1
PS_1800	MINDDS_CARD_270	85	M	N	White	Y		0	0	1
PS_1815	MINDDS_CARD_271	71	F	N	White	Y		0	0	1
PS_1822	MINDDS_NCARD_069	68	M	N	White	Y		0	0	1
PS_1841	MINDDS_NCARD_070	69	M	N	White	Y		0	0	1
PS_1843	MINDDS_CARD_275	74	M	N	White	Y		0	0	1
PS_1846	MINDDS_CARD_272	64	M	N	White	Y		0	0	1
PS_1847	MINDDS_CARD_278	71	F	N	White	Y		0	0	1
PS_1850	MINDDS_CARD_274	77	F	N	White	Y		0	0	1
PS_1860	MINDDS_CARD_276	66	M	N	White	Y		0	0	1
PS_1861	MINDDS_CARD_279	69	M	N	White	Y		0	0	1
PS_1862	MINDDS_CARD_277	71	M	N	White	Y		0	0	1
PS_1873	MINDDS_NCARD_072	67	M	N	White	Y		0	0	1
PS_1874	MINDDS_CARD_283	76	M	Unk	White	Y		0	0	1
PS_1888	MINDDS_CARD_281	71	M	N	White	Y		0	0	1
PS_1890	MINDDS_NCARD_071	76	F	N	White	Y		0	0	1
PS_1902	MINDDS_CARD_282	77	M	N	White	Y		0	0	1
PS_1905	MINDDS_CARD_280	83	F	N	White	Y		0	0	1
PS_1918	MINDDS_CARD_284	78	M	N	White	Y		0	0	1
PS_1919	MINDDS_CARD_287	82	M	N	White	Y		0	0	1
PS_1927	MINDDS_CARD_286	69	M	N	Asian	Y		0	0	1
PS_1930	MINDDS_CARD_285	81	M	N	White	Y		0	0	1
PS_1942	MINDDS_CARD_288	74	F	Unk	Unknown	Y		0	0	1
PS_049	n/a	71	M	N	White	Y	Patient unrandomized due to study team unavailable.	0	0	3
PS_058	n/a	71	M	N	White	Y	Patient unrandomized due to study team unavailable.	0	0	3
PS_126	n/a	65	M	UNK	White	Y- CPAP but will file minor deviation	Patient unrandomized due to study team unavailable.	0	0	3
PS_141	n/a	63	F	N	White	Y	Patient unrandomized due to study team unavailable.	0	0	3
PS_149	n/a	70	M	N	White	Y	Patient unrandomized due to study team unavailable.	0	0	3
PS_168		63	M	UNK	White	Y	Patient surgery rescheduled and study team unable to obtain his consent.	0	0	3
PS_202		72	F	N	White	Y	Patient recruited but surgery conducted after 12pm.	0	0	3
PS_204		62	M	N	White	Y	Patient recruited but surgery conducted after 12pm.	0	0	3
PS_222		74	M	N	White	Y	Patient recruited but not randomized due to receiving total circulatory arrest.	0	0	3
PS_224		74	M	N	White	Y	Patient recruited but not randomized as his surgery began too late for him to receive the drug on night 1.	0	0	3
PS_233		71	F	N	White	Y	Patient recruited but not randomized as her surgery began too late for her to receive the drug on night 1.	0	0	3
PS_236		76	F	N	White	Y	Patient recruited but not randomized as her surgery began too late for her to receive the drug on night 1.	0	0	3
PS_257		60	M	N	White	Y	Patient recruited but not randomized as her surgery began too late for her to receive the drug on night 1.	0	0	3
PS_261		69	M	N	White	Y	Patient recruited but not randomized as her surgery began too late for her to receive the drug on night 1.	0	0	3
PS_294		78	M	N	White	Y	Patient recruited but not randomized as his surgery began too late for her to receive the drug on night 1.	0	0	3
PS_322		74	M	N	White	Y	Patient recruited but not randomized as his surgery began too late for her to receive the drug on night 1.	0	0	3
PS_327		67	M	N	White	Y	Patient unreachable to complete baseline.	0	0	3
PS_360		70	M	UNK	White	Y	Patient unreachable to complete baseline.	0	0	3
PS_623		66	F	N	White	Y	Patient unreachable to complete baseline.	0	0	3
PS_637		71	F	N	White	Y	Patient unreachable to complete baseline.	0	0	3
PS_646		67	F	N	White	Y	Patient unreachable to complete baseline.	0	0	3
PS_678		65	M	N	White	Y	Patient unrandomized due to study team unavailable.	0	0	3
PS_685		73	F	N	White	Y	Patient did not book open heart surgery at MGH.	0	0	3
PS_686		68	M	N	White	Y	Patient unreachable to complete baseline.	0	0	3
PS_711		76	F	N	White	Y	Patient did not book open heart surgery at MGH.	0	0	3
PS_714		65	M	N	Asian	Y	Patient did not book open heart surgery at MGH.	0	0	3
PS_718		80	M	N	White	Y	Patient did not book open heart surgery at MGH.	0	0	3
PS_722		82	F	N	White	Y	Patient did not book open heart surgery at MGH.	0	0	3
PS_749		84	M	N	White	Y	Patient did not book open heart surgery at MGH.	0	0	3
PS_761		77	M	N	White	Y	Patient did not book open heart surgery at MGH.	0	0	3
PS_762		78	M	N	Asian	Y	Patient did not book open heart surgery at MGH.	0	0	3
PS_764		62	F	N	White	Y	Patient did not book open heart surgery at MGH.	0	0	3
PS_766		64	F	N	White	Y	Patient unrandomized due to study team unavailable.	0	0	3
PS_782		65	F	N	White	Y	Patient did not book open heart surgery at MGH.	0	0	3
PS_788		71	M	N	White	Y	Patient did not book open heart surgery at MGH.	0	0	3
PS_789		67	M	N	White	Y	Patient did not book open heart surgery at MGH.	0	0	3
PS_792		75	M	Unk	Black	Y	Patient did not book open heart surgery at MGH.	0	0	3
PS_807		75	M	N	White	Y	Patient unrandomized due to surgery too late	0	0	3
PS_808		83	M	Unk	White	Y	Patient unreachable to complete baseline.	0	0	3
PS_818		66	M	N	White	Y	Patient unreachable to complete baseline.	0	0	3
PS_900		68	M	N	White	Y	Patient unreachable to complete baseline.	0	0	3
PS_901		63	M	N	White	Y	Patient did not book open heart surgery at MGH.	0	0	3
PS_910		60	M	N	White	Y	Patient did not book open heart surgery at MGH.	0	0	3
PS_914		68	F	N	White	Y	Patient unreachable to complete baseline.	0	0	3
PS_915		79	M	N	White	Y	Patient did not book open heart surgery at MGH.	0	0	3
PS_919		77	M	N	White	Y	Patient did not book open heart surgery at MGH.	0	0	3
PS_923		61	M	N	White	Y	Patient did not book open heart surgery at MGH.	0	0	3
PS_938		89	F	N	White	Y	Patient did not book open heart surgery at MGH.	0	0	3
PS_939		86	M	N	White	Y	Patient did not book open heart surgery at MGH.	0	0	3
PS_953		62	M	N	White	Y	Patient did not book open heart surgery at MGH.	0	0	3
PS_954		61	M	N	White	Y	Patient did not book open heart surgery at MGH.	0	0	3
PS_957		68	F	N	White	Y	Patient did not book open heart surgery at MGH.	0	0	3
PS_1102		76	M	N	White	Y	Patient unreachable to complete baseline.	0	0	3
PS_1105		69	M	N	White	Y	Patient unreachable to complete baseline.	0	0	3
PS_1329		68	M	N	White	Y	Patient unreachable to complete baseline.	0	0	3
PS_1404		73	F	N	White	Y	Patient unrandomized due to study team unavailable.	0	0	3
PS_1537		78	M	N	White	Y	Surgery canceled due to high risk, not rescheduled.	0	0	3
PS_1832		60	M	N	White	Y	Patient unreachable to complete baseline.	0	0	3
PS_1884		67	M	N	White	Y	Patient unreachable to complete baseline.	0	0	3
PS_1893		82	F	N	White	Y	Patient surgery canceled due to high risk. May not have surgery at all. Will check schedule	0	0	3
PS_1915		74	M	N	White	Y	Patient was verbally consented, but due to study on coronavirus shutdown, was unable to be enrolled. Had surgery 5/12/2020	0	0	3
PS_1928		71	M	N	White	Y	Patient unreachable to complete baseline.	0	0	3
PS_1949		68	M	N	White	Y	Patient was verbally consented, but due to study on coronavirus shutdown, was unable to be enrolled. Had surgery 4/1/2020	0	0	3
PS_392		78	M	N	White	Y	Patient enrolled in conflicting study.	0	0	3
PS_1053			M	N	White	N	Patient enrolled in conflicting study.	0	0	3
PS_1620		66	M	N	White	Y	Patient said yes and completed baseline, but enrolled in conflicting study on DOS.	0	0	3
PS_1642		65	M	N	White	Y	Patient said yes and completed baseline, but enrolled in conflicting study. Conflicting study staff informed study team of intent to enroll before randomization.	0	0	3
															Refused
PS_012	n/a	72	M	N	White	Y	Patient declined study participation.	0	1	0
PS_015	n/a	65	F	N	White	Y	Patient declined study participation.	0	1	0
PS_027	n/a	69	F	N	White	Y	Patient declined study participation.	0	1	0
PS_035	n/a	83	M	N	White	Y	Patient declined study participation.	0	1	0
PS_063	n/a	63	F	N	White	Y	Patient declined study participation.	0	1	0
PS_086	n/a	73	F	N	White	Y	Patient declined study participation.	0	1	0
PS_100	n/a	81	F	N	White	Y	Patient declined study participation.	0	1	0
PS_105	n/a	70	M	N	White	Y	Patient declined study participation.	0	1	0
PS_112	n/a	68	F	N	White	Y	Patient declined study participation.	0	1	0
PS_151	n/a	79	F	N	White	Y	Patient declined study participation.	0	1	0
PS_156	n/a	82	M	UNK	White	Y	Patient declined study participation.	0	1	0
PS_175		73	F	N	White	Y	Patient declined study participation.	0	1	0
PS_183		73	M	N	White	Y	Patient declined study participation.	0	1	0
PS_188		74	M	N	White	Y	Patient declined study participation.	0	1	0
PS_196		76	M	N	White	Y	Patient declined study participation.	0	1	0
PS_205		83	F	N	White	Y	Patient declined study participation.	0	1	0
PS_216		72	M	N	White	Y	Patient declined study participation.	0	1	0
PS_226		68	F	N	White	Y	Patient declined study participation.	0	1	0
PS_230		72	F	N	White	Y	Patient declined study participation.	0	1	0
PS_234		71	M	N	White	Y	Patient declined study participation.	0	1	0
PS_241		74	M	N	White	Y	Patient declined study participation.	0	1	0
PS_255		74	M	N	White	Y	Patient declined study participation.	0	1	0
PS_256		60	M	N	White	Y	Patient declined study participation.	0	1	0
PS_267		75	M	N	White	Y	Patient declined study participation.	0	1	0
PS_273		80	M	N	White	Y	Patient declined study participation.	0	1	0
PS_336		70	M	N	White	Y	Patient declined study participation.	0	1	0
PS_349		71	M	N	White	Y	Patient declined study participation.	0	1	0
PS_359		72	F	N	White	Y	Patient declined study participation when called for baseline.	0	1	0
PS_373		71	F	N	White	Y	Patient declined study participation.	0	1	0
PS_386		81	F	N	Asian	Y	Patient declined study participation.	0	1	0
PS_391		60	M	N	White	Y	Patient declined study participation.	0	1	0
PS_393		69	M	N	White	Y	Patient declined study participation.	0	1	0
PS_406		75	M	N	White	Y	Patient declined study participation.	0	1	0
PS_408		64	F	N	White	Y	Patient declined study participation.	0	1	0
PS_414		67	M	N	White	Y	Patient declined study participation.	0	1	0
PS_423		64	F	N	White	Y	Patient declined study participation.	0	1	0
PS_436		61	F	N	White	Y	Patient declined study participation.	0	1	0
PS_459		74	M	N	White	Y	Patient declined study participation.	0	1	0
PS_462		75	M	N	Black	Y	Patient declined study participation.	0	1	0
PS_464		63	M	N	White	Y	Patient declined study participation.	0	1	0
PS_466		83	F	N	White	Y	Patient declined study participation.	0	1	0
PS_578		69	M	N	White	Y	Patient declined study participation.	0	1	0
PS_580		63	M	N	Asian	Y	Patient declined study participation.	0	1	0
PS_605		82	F	N	White	Y	Patient declined study participation.	0	1	0
PS_608		76	F	N	White	Y	Patient declined study participation.	0	1	0
PS_657		74	M	N	White	Y	Patient declined study participation.	0	1	0
PS_704		61	F	N	White	Y	Patient declined study participation.	0	1	0
PS_705		61	M	N	Other	Y	Patient declined study participation.	0	1	0
PS_706		64	M	N	White	Y	Patient declined study participation.	0	1	0
PS_715		68	M	N	Other	Y	Patient declined study participation.	0	1	0
PS_725		60	M	Unk	White	Y	Patient declined study participation.	0	1	0
PS_727		63	M	N	White	Y	Patient declined study participation.	0	1	0
PS_734		76	F	Unk	White	Y	Patient declined study participation.	0	1	0
PS_743		63	F	N	Asian	Y	Patient declined study participation.	0	1	0
PS_747		81	M	Unk	Unk	Y	Patient declined study participation.	0	1	0
PS_753		66	F	N	White	Y	Patient declined study participation when called for baseline.	0	1	0
PS_794		72	M	Unk	Unk	Y	Patient declined study participation.	0	1	0
PS_797		76	M	N	White	Y	Patient declined study participation.	0	1	0
PS_813		64	F	N	White	Y	Patient declined study participation.	0	1	0
PS_823		69	M	Unk	White	Y	Patient declined study participation.	0	1	0
PS_836		70	M	N	White	Y	Patient declined study participation.	0	1	0
PS_857		65	F	Unk	Black	Y	Patient declined study participation when called for baseline.	0	1	0
PS_877		66	M	N	White	Y	Patient declined study participation when called for baseline.	0	1	0
PS_881		82	F	N	White	Y	Patient declined study participation when called for baseline.	0	1	0
PS_886		75	M	N	White	Y	Patient declined study participation.	0	1	0
PS_896		63	M	N	White	Y	Patient declined study participation.	0	1	0
PS_906		60	M	N	White	Y	Patient declined study participation.	0	1	0
PS_912		69	M	N	Unk	Y	Patient declined study participation when called for baseline.	0	1	0
PS_918		72	M	N	White	Y	Patient declined study participation.	0	1	0
PS_920		79	M	N	White	Y	Patient declined study participation.	0	1	0
PS_945		67	M	N	White	Y	Patient declined study participation.	0	1	0
PS_950		75	F	N	White	Y	Patient declined study participation.	0	1	0
PS_969		72	M	N	White	Y	Patient declined study participation.	0	1	0
PS_978		71	F	N	White	Y	Patient declined study participation.	0	1	0
PS_986		67	M	N	White	Y	Patient declined study participation.	0	1	0
PS_996		80	F	N	White	Y	Patient declined study participation.	0	1	0
PS_1005		73	M	N	White	Y	Patient declined study participation.	0	1	0
PS_1016		65	M	N	White	Y	Patient declined study participation.	0	1	0
PS_1023		75	F	N	White	Y	Patient declined study participation.	0	1	0
PS_1027		63	M	N	White	Y	Patient declined study participation.	0	1	0
PS_1029		66	F	N	White	Y	Patient declined study participation.	0	1	0
PS_1042		64	F	N	White	Y	Patient declined study participation.	0	1	0
PS_1044		67	M	N	White	Y	Patient declined study participation.	0	1	0
PS_1052		64	M	N	White	Y	Patient declined study participation.	0	1	0
PS_1057		64	F	N	White	Y	Patient declined study participation.	0	1	0
PS_1061		70	M	N	White	Y	Patient declined study participation.	0	1	0
PS_1069		70	M	Y	White	Y	Patient declined study participation.	0	1	0
PS_1073		61	F	Unk	Unknown	Y	Patient declined study participation.	0	1	0
PS_1085		70	F	N	White	Y	Patient declined study participation.	0	1	0
PS_1099		67	F	N	White	Y	Patient declined study participation.	0	1	0
PS_1124		78	M	Unk	Asian	Y	Patient declined study participation.	0	1	0
PS_1134		68	F	Y	Other	Y	Patient declined study participation when called for baseline.	0	1	0
PS_1147		70	M	N	White	Y	Patient declined study participation.	0	1	0
PS_1153		63	M	N	White	Y	Patient declined study participation when called for baseline.	0	1	0
PS_1170		75	F	N	White	Y	Patient declined study participation when called for baseline.	0	1	0
PS_1172		77	F	N	White	Y	Patient declined study participation.	0	1	0
PS_1190		79	M	N	White	Y	Patient declined study participation.	0	1	0
PS_1193		62	M	N	Unknown	Y	Patient declined study participation.	0	1	0
PS_1194		62	M	Unk	Unknown	Y	Patient declined study participation.	0	1	0
PS_1209		82	F	N	White	Y	Patient declined study participation.	0	1	0
PS_1222		77	F	N	White	Y	Patient declined study participation when called for baseline.	0	1	0
PS_1240		66	M	N	White	Y	Patient declined study participation when called for baseline.	0	1	0
PS_1244		77	M	N	White	Y	Patient declined study participation when called for baseline.	0	1	0
PS_1248		76	M	N	White	Y	Patient declined study participation.	0	1	0
PS_1260		77	M	N	White	Y	Patient declined study participation.	0	1	0
PS_1268		60	M	N	White	Y	Patient declined study participation.	0	1	0
PS_1275		72	M	N	White	Y	Patient declined study participation when called for baseline.	0	1	0
PS_1288		71	F	N	White	Y	Patient declined study participation.	0	1	0
PS_1293		75	F	Unk	White	Y	Patient declined study participation.	0	1	0
PS_1295		64	M	Unk	White	Y	Patient declined study participation when called for baseline.	0	1	0
PS_1300		77	F	N	White	Y	Patient declined study participation.	0	1	0
PS_1313		65	M	N	White	Y	Patient declined study participation when called for baseline.	0	1	0
PS_1330		65	M	N	White	Y	Patient declined study participation.	0	1	0
PS_1332		75	F	N	White	Y	Patient declined study participation.	0	1	0
PS_1341		65	M	Unk	White	Y	Patient declined study participation.	0	1	0
PS_1342		64	F	N	White	Y	Patient declined study participation.	0	1	0
PS_1344		68	F	N	White	Y	Patient declined study participation.	0	1	0
PS_1365		67	M	N	White	Y	Patient declined study participation.	0	1	0
PS_1370		70	M	N	White	Y	Patient declined study participation.	0	1	0
PS_1384		71	F	N	White	Y	Patient declined study participation.	0	1	0
PS_1390		77	F	Unk	White	Y	Patient declined study participation.	0	1	0
PS_1395		64	M	N	White	Y	Patient declined study participation.	0	1	0
PS_1400		70	M	N	White	Y	Patient declined study participation.	0	1	0
PS_1402		74	F	N	White	Y	Patient declined study participation.	0	1	0
PS_1406		72	M	N	White	Y	Patient declined study participation.	0	1	0
PS_1417		80	F	Unk	Unknown	Y	Patient declined study participation.	0	1	0
PS_1426		68	M	N	White	Y	Patient declined study participation.	0	1	0
PS_1427		66	F	N	White	Y	Patient declined study participation.	0	1	0
PS_1440		75	M	N	White	Y	Patient declined study participation.	0	1	0
PS_1443		68	F	N	White	Y	Patient declined study participation.	0	1	0
PS_1451		64	F	N	White	Y	Patient declined study participation.	0	1	0
PS_1454			M	N	White	N	Patient declined study participation.	0	1	0
PS_1463		74	M	N	White	Y	Patient declined study participation.	0	1	0
PS_1466		61	F	N	White	Y	Patient declined study participation.	0	1	0
PS_1486		61	M	N	White	Y	Patient declined study participation.	0	1	0
PS_1487		67	M	N	White	Y	Patient declined study participation.	0	1	0
PS_1501		67	M	N	White	Y	Patient declined study participation.	0	1	0
PS_1504		82	F	Unk	White	Y	Patient declined study participation.	0	1	0
PS_1512		61	M	N	White	Y	Patient declined study participation.	0	1	0
PS_1520		60	F	N	White	Y	Patient declined study participation.	0	1	0
PS_1521		79	M	N	Asian	Y	Patient declined study participation.	0	1	0
PS_1526		70	M	N	White	Y	Patient declined study participation.	0	1	0
PS_1530		80	M	N	White	Y	Patient declined study participation.	0	1	0
PS_1542		72	M	N	Black or African American	Y	Patient declined study participation.	0	1	0
PS_1544		70	M	N	White	Y	Patient declined study participation.	0	1	0
PS_1552		71	M	N	White	Y	Patient declined study participation.	0	1	0
PS_1553		71	F	N	White	Y	Patient declined study participation.	0	1	0
PS_1555		74	M	N	White	Y	Patient declined study participation.	0	1	0
PS_1561		64	F	N	White	Y	Patient declined study participation.	0	1	0
PS_1566		71	F	N	White	Y	Patient declined study participation.	0	1	0
PS_1576		69	F	N	White	Y	Patient declined study participation.	0	1	0
PS_1577		69	M	N	White	Y	Patient declined study participation.	0	1	0
PS_1578		70	M	N	White	Y	Patient declined study participation.	0	1	0
PS_1581		74	F	N	White	Y	Patient declined study participation.	0	1	0
PS_1585		68	M	Unk	White	Y	Patient declined study participation.	0	1	0
PS_1606		82	M	N	White	Y	Patient declined study participation.	0	1	0
PS_1618		75	F	N	White	Y	Patient declined study participation.	0	1	0
PS_1631		67	M	N	White	Y	Patient declined study participation.	0	1	0
PS_1643		68	F	N	White	Y	Patient declined study participation.	0	1	0
PS_1646		82	F	N	White	Y	Patient declined study participation.	0	1	0
PS_1654		66	M	N	White	Y	Patient declined study participation.	0	1	0
PS_1658		72	F	N	White	Y	Patient declined study participation.	0	1	0
PS_1661		73	M	N	Asian	Y	Patient declined study participation.	0	1	0
PS_1669		70	M	N	White	Y	Patient declined study participation.	0	1	0
PS_1670		72	M	N	White	Y	Patient declined study participation.	0	1	0
PS_1675		78	F	N	White	Y	Patient declined study participation.	0	1	0
PS_1687		65	F	N	White	Y	Patient declined study participation.	0	1	0
PS_1691		83	F	N	White	Y	Patient declined study participation.	0	1	0
PS_1711		59	M	N	White	Y	Patient declined study participation.	0	1	0
PS_1717		73	M	N	White	Y	Patient declined study participation.	0	1	0
PS_1718		84	M	N	White	Y	Patient declined study participation.	0	1	0
PS_1739		62	M	N	Other	Y	Patient declined study participation	0	1	0
PS_1741		63	F	N	White	Y	Patient declined study participation.	0	1	0
PS_1742		70	F	N	White	Y	Patient declined study participation.	0	1	0
PS_1743		71	M	N	White	Y	Patient declined study participation.	0	1	0
PS_1753		74	F	N	White	Y	Patient declined study participation.	0	1	0
PS_1755		72	M	N	White	Y	Patient declined study participation.	0	1	0
PS_1764		69	M	N	White	Y	Patient declined study participation.	0	1	0
PS_1777		72	M	N	White	Y	Patient declined study participation.	0	1	0
PS_1782		60	M	N	White	Y	Patient declined study participation.	0	1	0
PS_1785		65	M	Unk	Unknown	Y	Patient declined study participation.	0	1	0
PS_1789		79	F	N	White	Y	Patient declined study participation.	0	1	0
PS_1810			M	N	White	Y	Patient declined study participation.	0	1	0
PS_1812		65	M	Unk	White	Y	Patient declined study participation.	0	1	0
PS_1820		62	F	N	White	Y	Patient declined study participation.	0	1	0
PS_1828		82	F	N	White	Y	Patient declined study participation.	0	1	0
PS_1836		71	M	N	White	Y	Patient declined study participation.	0	1	0
PS_1853		90	M	N	White	Y	Patient declined study participation.	0	1	0
PS_1858		64	F	Y	Other	Y	Patient declined study participation.	0	1	0
PS_1871		81	F	N	Black or African American	Y	Patient declined study participation.	0	1	0
PS_1872		66	M	N	White	Y	Patient declined study participation.	0	1	0
PS_1875		78	F	N	White	Y	Patient declined study participation.	0	1	0
PS_1883		62	F	N	White	Y	Patient declined study participation.	0	1	0
PS_1889		73	F	Unk	White	Y	Patient declined study participation.	0	1	0
PS_1904		70	M	N	White	Y	Patient declined study participation.	0	1	0
PS_1913		73	M	N	White	Y	Patient declined study participation.	0	1	0
PS_1924		64	M	N	White	Y	Patient declined study participation when called for baseline.	0	1	0
PS_1943		76	F	N	White	Y	Patient declined study participation.	0	1	0
PS_1944		69	M	N	White	Y	Patient declined study participation.	0	1	0
PS_265		62	F	N	White	Y	Patient declined study discussion.	0	2	0
PS_270		65	M	N	White	Y	Patient declined study discussion.	0	2	0
PS_277		63	M	N	White	Y	Patient declined study discussion.	0	2	0
PS_278		73	F	N	White	Y	Patient declined study discussion.	0	2	0
PS_291		77	F	N	White	Y	Patient declined study discussion.	0	2	0
PS_293		60	F	N	White	Y	Patient declined study discussion.	0	2	0
PS_309		65	M	N	White	Y	Patient declined study discussion.	0	2	0
PS_318		65	F	N	White	Y	Patient declined study discussion.	0	2	0
PS_340		75	M	N	White	Y	Patient declined study discussion; NP told not to approach	0	2	0
PS_348		66	F	N	White	Y	Patient declined study discussion.	0	2	0
PS_350		68	F	N	White	Y	Patient declined study discussion.	0	2	0
PS_363		74	M	N	White	Y	Patient declined study discussion.	0	2	0
PS_371		77	M	UNK	UNK	Y	Patient declined study discussion.	0	2	0
PS_409		88	M	N	White	Y	Patient declined study discussion.	0	2	0
PS_415		67	M	UNK	White	Y	Patient declined study discussion.	0	2	0
PS_425		69	M	N	White	Y	Patient declined study discussion.	0	2	0
PS_428		UNK	UNK	UNK	UNK	Y	Patient declined study discussion.	0	2	0
PS_430		64	M	N	UNK	Y	Patient declined study discussion.	0	2	0
PS_490		69	M	N	White	Y	Patient declined study discussion.	0	2	0
PS_491		71	M	N	White	Y	Patient declined study discussion.	0	2	0
PS_493		73	M	N	White	Y	Patient declined study discussion.	0	2	0
PS_494		76	M	N	White	Y	Patient declined study discussion.	0	2	0
PS_498		64	M	N	White	Y	Patient declined study discussion.	0	2	0
PS_507		69	M	N	White	Y	Patient declined study discussion.	0	2	0
PS_510		62	M	Unk	White	Y	Patient declined study discussion.	0	2	0
PS_514		77	F	N	White	Y	Patient declined study discussion.	0	2	0
PS_516		72	F	N	White	Y	Patient declined study discussion; NP told not to approach	0	2	0
PS_517		69	M	N	White	Y	Patient declined study discussion.	0	2	0
PS_522		69	F	N	White	Y	Patient declined study discussion.	0	2	0
PS_523		71	F	N	White	Y	Patient declined study discussion.	0	2	0
PS_536		71	M	N	White	Y	Patient declined study discussion.	0	2	0
PS_538		60	M	N	White	Y	Patient declined study discussion.	0	2	0
PS_546		84	F	N	White	Y	Patient declined study discussion.	0	2	0
PS_559		74	M	N	White	Y	Patient declined study discussion.	0	2	0
PS_564		79	M	N	White	Y	Patient declined study discussion.	0	2	0
PS_612		81	M	N	White	Y	Patient declined study discussion.	0	2	0
PS_615		73	M	N	White	Y	Patient declined study discussion.	0	2	0
PS_634		60	M	N	White	Y	Patient declined study discussion.	0	2	0
PS_649		75	M	N	White	Y	Patient declined study discussion; NP told not to approach	0	2	0
PS_667		78	F	N	White	Y	Patient declined study discussion; NP told not to approach	0	2	0
PS_677		65	M	N	Unk	Y	Patient declined study discussion; NP told not to approach	0	2	0
PS_680		72	F	N	White	Y	Patient declined study discussion; NP told not to approach	0	2	0
PS_681		83	M	Unk	White	Y	Patient declined study discussion; NP told not to approach	0	2	0
PS_752		62	F	N	White	Y	Patient declined study discussion.	0	2	0
PS_772		67	M	N	White	Y	Patient declined study discussion.	0	2	0
PS_790		60	M	N	White	Y	Patient declined study discussion.	0	2	0
PS_791		84	M	N	White	Y	Patient declined study discussion.	0	2	0
PS_793		76	M	N	White	Y	Patient declined study discussion.	0	2	0
PS_850		76	M	N	White	Y	Patient declined study discussion.	0	2	0
PS_856		69	F	N	White	Y	Patient declined study discussion.	0	2	0
PS_865		69	M	N	White	Y	Patient declined study discussion.	0	2	0
PS_867		66	F	N	White	Y	Patient declined study discussion.	0	2	0
PS_987		69	F	N	White	Y	Patient declined study discussion.	0	2	0
PS_991		74	F	N	White	Y	Patient declined study discussion.	0	2	0
PS_1067		68	M	N	White	Y	Patient declined study discussion.	0	2	0
PS_1084		84	M	N	White	Y	Patient declined study discussion.	0	2	0
PS_1109		60	M	N	White	Y	Patient declined study discussion.	0	2	0
PS_1232		61	M	N	White	Y	Patient declined study discussion.	0	2	0
PS_1266		70	F	N	White	Y	Patient declined study discussion.	0	2	0
PS_1272		71	F	N	White	Y	Patient declined study discussion.	0	2	0
PS_1282		70	M	N	White	Y	Patient declined study discussion.	0	2	0
PS_1399		61	M	N	White	Y	Patient declined study discussion.	0	2	0
PS_1458		70	M	N	White	Y	Patient declined study discussion.	0	2	0
PS_1460		68	F	N	White	Y	Patient declined study discussion.	0	2	0
PS_1489		72	M	N	White	Y	Patient declined study discussion.	0	2	0
PS_1640		64	M	N	White	Y	Patient declined study discussion.	0	2	0
PS_1933		71	F	Y	Unknown	Y	Patient declined study discussion.	0	2	0
PS_001	n/a		UNK	UNK	UNK	Y	Patient declined study participation on DOS.	0	0	2
PS_011	n/a	84	F	N	White	Y	Patient declined study participation prior to DOS.	0	0	2
PS_135	n/a	83	M	N	White	Y- except lives 100 miles away	Patient declined study participation on DOS.	0	0	2
PS_154	n/a	68	F	N	White	Y	Patient declined study participation on DOS.	0	0	2
PS_325		76	F	N	White	Y	Patient declined study participation on DOS.	0	0	2
PS_424		82	M	N	White	Y	Patient declined study participation on DOS.	0	0	2
PS_446		69	F	N	White	Y	Patient declined study participation on DOS.	0	0	2
PS_461		72	F	N	White	Y	Patient declined study participation prior to DOS.	0	0	2
PS_495		71	M	N	White	Y	Patient declined study participation on DOS.	0	0	2
PS_553		67	M	N	White	Y	Patient declined study participation on DOS.	0	0	2
PS_625		69	M	N	White	Y	Patient declined study participation on DOS.	0	0	2
PS_645		61	M	Unk	Unk	Y	Patient declined study participation on DOS.	0	0	2
PS_659		63	M	N	White	Y	Patient declined study participation on DOS.	0	0	2
PS_689		80	M	N	White	Y	Patient declined study participation on DOS.	0	0	2
PS_799		67	F	Unk	White	Y	Patient declined study participation on DOS.	0	0	2
PS_849		75	M	N	White	Y	Patient declined study participation on DOS.	0	0	2
PS_905		70	M	N	White	Y	Patient declined study participation prior to DOS.	0	0	2
PS_913		64	M	N	White	Y	Patient declined study participation prior to DOS.	0	0	2
PS_1002		65	M	N	White	Y	Patient declined study participation on DOS.	0	0	2
PS_1032		69	F	Unk	White	Y	Patient declined study participation on DOS.	0	0	2
PS_1033		70	M	Unk	White	Y	Patient completed baseline and then declined study participation.	0	0	2
PS_1101		71	M	N	White	Y	Patient declined study participation prior to DOS.	0	0	2
PS_1110		61	F	N	White	Y	Patient declined study participation on DOS.	0	0	2
PS_1148		75	M	Unk	White	Y	Patient declined study participation prior to DOS.	0	0	2
PS_1184		66	M	N	White	Y	Patient declined study participation on DOS.	0	0	2
PS_1189		73	M	N	White	Y	Patient declined study participation on DOS.	0	0	2
PS_1214		67	M	N	White	Y	Patient declined study participation on DOS.	0	0	2
PS_1279		73	F	N	White	Y	Patient declined study participation on DOS.	0	0	2
PS_1292		66	M	N	White	Y	Patient declined study participation on DOS.	0	0	2
PS_1302		66	F	N	White	Y	Patient declined study participation on DOS.	0	0	2
PS_1543		73	F	N	White	Y	Patient declined study participation on DOS.	0	0	2
PS_1607		83	M	N	White	Y	Patient declined study participation on DOS.	0	0	2
PS_1769		76	F	N	White	Y	Patient declined study participation on DOS.	0	0	2
PS_1798		76	F	N	White	Y	Patient declined study participation on DOS.	0	0	2
PS_1816		84	M	N	White	Y	Patient declined study participation on DOS.	0	0	2
PS_1939		67	F	N	White	Y	Patient declined study participation after baseline completion / Patient declined study participation prior to DOS.	0	0	2
PS_1354		69	M	N	White	Y	Patient declined study participation.	1	0	0

## Sheet: During COVID Non-Approaches
PreScreen Subject #	Subject Study Number	Age	Sex	Ethnicity	Race	Met Eligibility Criteria (Y/N)	Reason for Exclusion/Screen Failure	Didn’t Approach: 1 - Ineligible, 2 - Approached by conflicting study, 3 - Other (left before could approach, PPE canceled, Surgery canceled, unable to approach due to corornavirus shutdown/covid exposure)	Said No: 1- No to participation (including when called for baseline), 2 - No to discussion, 3 - Other (maybe but unreachable, maybe but surgery canceled)	Said Yes: 1 - Participated, 2 - Yes and completed baseline but declined before or on DOS, 3 - Other (unrandomized, did not book open heart surgery at MGH, unreachable to complete baseline, coronavirus shutdown/covid exposure, surgery canceled after recruitment, enrolled in conflicting study, died before surgery)	Reason for Decline
PS_2041		69	M	N	White	Y	Patient approached by conflicting study.	2	0	0					Not approached due to study overlap
PS_2046		77	F	N	White	Y	Patient approached by conflicting study.	2	0	0
PS_2059		83	M	N	White	Y	Patient approached by conflicting study.	2	0	0
PS_2065		65	M	N	White	Y	Patient approached by conflicting study.	2	0	0
PS_2079		65	M	N	White	Y	Patient approached by conflicting study.	2	0	0
PS_2093		66	M	N	White	Y	Patient approached by conflicting study.	2	0	0
PS_2096		73	M	Unk	White	Y	Patient approached by conflicting study.	2	0	0
PS_2097		79	F	N	White	Y	Patient approached by conflicting study.	2	0	0
PS_2109		69	M	N	White	Y	Patient approached by conflicting study.	2	0	0
PS_2110		72	F	Unk	White	Y	Patient approached by conflicting study.	2	0	0
PS_2136		71	F	N	White	Y	Patient approached by conflicting study.	2	0	0
PS_2137		78	M	N	White	Y	Patient approached by conflicting study.	2	0	0
PS_2138		78	M	N	White	Y	Patient approached by conflicting study.	2	0	0
PS_2156		76	M	N	White	Y	Patient approached by conflicting study.	2	0	0
PS_2160		63	M	N	Unknown	Y	Patient approached by conflicting study.	2	0	0
PS_2164		83	M	N	White	Y	Patient approached by conflicting study.	2	0	0
PS_2173		66	M	Unk	White	Y	Patient approached by conflicting study.	2	0	0
PS_2193		66	M	N	White	Y	Patient approached by conflicting study.	2	0	0
PS_2195		71	M	N	White	Y	Patient approached by conflicting study.	2	0	0
PS_2196		75	M	N	White	Y	Patient approached by conflicting study.	2	0	0
PS_2200		81	M	N	White	Y	Patient approached by conflicting study.	2	0	0
PS_2209		76	F	N	White	Y	Patient approached by conflicting study.	2	0	0
PS_2210		79	M	N	Unknown	Y	Patient approached by conflicting study.	2	0	0
PS_2232		66	F	N	White	Y	Patient approached by conflicting study.	2	0	0
PS_2240		66	F	N	White	Y	Patient approached by conflicting study.	2	0	0
PS_2241		73	M	N	White	Y	Patient approached by conflicting study.	2	0	0
PS_2250		71	M	N	White	Y	Patient approached by conflicting study.	2	0	0
PS_2251		75	M	N	White	Y	Patient approached by conflicting study.	2	0	0
PS_2260		63	F	N	White	Y	Patient approached by conflicting study.	2	0	0
PS_2278		62	M	N	White	Y	Patient approached by conflicting study.	2	0	0
PS_2279		62	M	N	White	Y	Patient approached by conflicting study.	2	0	0
PS_2282		75	M	Unk	Unknown	Y	Patient approached by conflicting study.	2	0	0
PS_2283		76	F	N	White	Y	Patient approached by conflicting study.	2	0	0
PS_2285		80	M	N	White	Y	Patient approached by conflicting study.	2	0	0
PS_2292		60	M	Y	Other	Y	Patient approached by conflicting study.	2	0	0
PS_2297		76	M	N	White	Y	Patient approached by conflicting study.	2	0	0
PS_2306		69	M	N	White	Y	Patient approached by conflicting study.	2	0	0
PS_2311		60	M	N	White	Y	Patient approached by conflicting study.	2	0	0
PS_2318		71	M	N	White	Y	Patient approached by conflicting study.	2	0	0
PS_2319		73	M	N	White	Y	Patient approached by conflicting study.	2	0	0
PS_2326		60	F	Unk	White	Y	Patient approached by conflicting study.	2	0	0
PS_2329		62	M	N	White	Y	Patient approached by conflicting study.	2	0	0
PS_2335		77	M	N	White	Y	Patient approached by conflicting study.	2	0	0
PS_2339		62	F	Unk	White	Y	Patient approached by conflicting study.	2	0	0
PS_2344		69	M	N	White	Y	Patient approached by conflicting study.	2	0	0
PS_2346		74	M	N	White	Y	Patient approached by conflicting study.	2	0	0
PS_2347		77	F	N	White	Y	Patient approached by conflicting study.	2	0	0
PS_2355		64	M	Unk	White	Y	Patient approached by conflicting study.	2	0	0
PS_2358		67	M	N	White	Y	Patient approached by conflicting study.	2	0	0
PS_2359		73	M	N	White	Y	Patient approached by conflicting study.	2	0	0
PS_2373		78	M	N	White	Y	Patient approached by conflicting study.	2	0	0
PS_2377		73	M	Unk	Unknown	Y	Patient approached by conflicting study.	2	0	0
PS_2379		60	M	N	White	Y	Patient approached by conflicting study.	2	0	0
PS_2382		68	M	Unk	White	Y	Patient apprached by conflicting study.	2	0	0
PS_2384		75	F	N	White	Y	Patient approached by conflicting study.	2	0	0
PS_2388		69	M	N	White	Y	Patient approached by conflicting study.	2	0	0
PS_2394		66	M	N	White	Y	Patient approached by conflicting study.	2	0	0
PS_2396		81	M	N	White	Y	Patient approached by conflicting study.	2	0	0
PS_2402		77	M	Unk	Unknown	Y	Patient approached by conflicting study.	2	0	0
PS_2406		72	F	N	White	Y	Patient approached by conflicting study.	2	0	0
PS_2409		76	M	Unk	White	Y	Patient approached by conflicting study.	2	0	0
PS_2410		76	M	N	White	Y	Patient approached by conflicting study.	2	0	0
PS_2419		60	M	N	White	Y	Patient approached by conflicting study.	2	0	0
PS_2421		67	M	N	White	Y	Patient approached by conflicting study.	2	0	0
PS_2422		73	F	Unk	White	Y	Patient approached by conflicting study.	2	0	0
PS_2431		65	M	N	White	Y	Patient approached by conflicting study.	2	0	0
PS_2437		73	M	N	White	Y	Patient approached by conflicting study.	2	0	0
PS_2447		66	M	N	White	Y	Patient approached by conflicting study.	2	0	0
PS_2452		73	M	N	White	Y	Patient approached by conflicting study.	2	0	0
PS_2464		65	M	Unk	Unknown	Y	Patient approached by conflicting study.	2	0	0
PS_2467		66	F	N	White	Y	Patient approached by conflicting study.	2	0	0
PS_2469		71	M	N	White	Y	Patient approached by conflicting study.	2	0	0
PS_2483		69	M	N	White	Y	Patient approached by conflicting study.	2	0	0
PS_2485		80	M	N	White	Y	Patient approached by conflicting study.	2	0	0
PS_2487		65	M	N	White	Y	Patient approached by conflicting study.	2	0	0
PS_2488		66	M	N	White	Y	Patient approached by conflicting study.	2	0	0
PS_2496		75	M	N	White	Y	Patient approached by conflicting study.	2	0	0
PS_2508		66	M	N	White	Y	Patient approached by conflicting study.	2	0	0
PS_2509		71	M	N	Other	Y	Patient approached by conflicting study.	2	0	0
PS_2510		80	M	N	White	Y	Patient approached by conflicting study.	2	0	0
PS_2511		63	M	Unk	Asian	Y	Patient approached by conflicting study.	2	0	0
PS_2513		71	M	N	White	Y	Patient approached by conflicting study.	2	0	0
PS_2520		62	M	N	Unknown	Y	Patient approached by conflicting study.	2	0	0
PS_2522		65	M	N	White	Y	Patient approached by conflicting study.	2	0	0
PS_2523		68	M	N	White	Y	Patient approached by conflicting study.	2	0	0
PS_2526		78	M	N	White	Y	Patient approached by conflicting study.	2	0	0
PS_2533		61	F	N	White	Y	Patient approached by conflicting study.	2	0	0
PS_2536		66	F	N	White	Y	Patient approached by conflicting study.	2	0	0
PS_2559		61	M	N	White	Y	Patient approached by conflicting study.	2	0	0
PS_2561		69	M	N	White	Y	Patient approached by conflicting study.	2	0	0
PS_2562		70	M	N	White	Y	Patient approached by conflicting study.	2	0	0
PS_2577		61	M	N	White	Y	Patient approached by conflicting study.	2	0	0
PS_2584		81	M	N	White	Y	Patient approached by conflicting study.	2	0	0
PS_2591		64	F	N	White	Y	Patient approached by conflicting study.	2	0	0
PS_2592		64	M	Unk	Unknown	Y	Patient approached by conflicting study.	2	0	0
PS_2594		69	F	N	White	Y	Patient approached by conflicting study.	2	0	0
PS_2595		70	F	N	Black or African American	Y	Patient approached by conflicting study.	2	0	0
PS_2598		82	M	N	White	Y	Patient approached by conflicting study.	2	0	0
PS_2604		68	F	N	White	Y	Patient approached by conflicting study.	2	0	0
PS_2611		80	M	N	White	Y	Patient approached by conflicting study.	2	0	0
PS_2618		75	F	N	White	Y	Patient approached by conflicting study.	2	0	0
PS_2637		65	F	N	White	Y	Patient approached by conflicting study.	2	0	0
PS_2639		79	M	Unk	White	Y	Patient approached by conflicting study.	2	0	0
PS_2645		63	M	N	White	Y	Patient approached by conflicting study.	2	0	0
PS_2653		64	M	N	White	Y	Patient approached by conflicting study.	2	0	0
PS_2654		70	M	N	White	Y	Patient approached by conflicting study.	2	0	0
PS_2655		71	F	N	White	Y	Patient approached by conflicting study.	2	0	0
PS_2656		71	F	N	White	Y	Patient approached by conflicting study.	2	0	0
PS_2657		72	F	N	White	Y	Patient approached by conflicting study.	2	0	0
PS_2658		73	F	N	White	Y	Patient approached by conflicting study.	2	0	0
PS_2659		75	M	N	White	Y	Patient approached by conflicting study.	2	0	0
PS_2665		68	F	N	White	Y	Patient approached by conflicting study.	2	0	0
PS_2667		78	F	N	White	Y	Patient approached by conflicting study.	2	0	0
PS_2669		84	M	N	Asian	Y	Patient approached by conflicting study.	2	0	0
PS_2673		63	F	N	White	Y	Patient approached by conflicting study.	2	0	0
PS_2674		65	M	Unk	White	Y	Patient approached by conflicting study.	2	0	0
PS_2676		65	M	N	White	Y	Patient approached by conflicting study.	2	0	0
PS_2677		67	M	N	White	Y	Patient approached by conflicting study.	2	0	0
PS_2678		67	F	N	White	Y	Patient approached by conflicting study.	2	0	0
PS_2680		74	M	N	White	Y	Patient approached by conflicting study.	2	0	0
PS_2681		78	M	N	White	Y	Patient approached by conflicting study.	2	0	0
PS_2686		65	M	Unk	White	Y	Patient approached by conflicting study.	2	0	0
PS_2687		67	M	N	White	Y	Patient approached by conflicting study.	2	0	0
PS_2688		67	M	N	White	Y	Patient approached by conflicting study.	2	0	0
PS_2689		69	M	Unk	White	Y	Patient approached by conflicting study.	2	0	0
PS_2690		70	M	N	White	Y	Patient approached by conflicting study.	2	0	0
PS_2691		70	M	N	White	Y	Patient approached by conflicting study.	2	0	0
PS_2693		73	M	N	White	Y	Patient approached by conflicting study.	2	0	0
PS_2694		74	F	N	White	Y	Patient approached by conflicting study.	2	0	0
PS_2695		75	M	N	White	Y	Patient approached by conflicting study.	2	0	0
PS_2628		63	F	N	White	Y	Patient approached by conflicting study.	1	0	0
PS_2363		78	M	N	White	Y	Patient approached by conflicting study.	1	0	0
PS_1988		72	M	N	White	Y	PPE and surgery canceled.	3	0	0					Not approached for other reason
PS_2191		63	M	N	White	Y	PPE canceled.	3	0	0
PS_2222		73	M	N	White	Y	Patient not approached due study team unavailability on his surgery date.	3	0	0
PS_2239		65	M	N	White	Y	Study team unable to approach due to temporary lab shutdown as a result of study team covid exposure.	3	0	0
PS_2243		76	F	N	White	Y	Study team unable to approach due to temporary lab shutdown as a result of study team covid exposure.	3	0	0
PS_2493		70	M	N	White	Y	Admitted to ED, PPE done while inpatient, unable to approach	3	0	0
PS_2506		63	M	N	Unknown	Y	Patient's surgery was canceled.	3	0	0
PS_2696		78	M	N	White	Y	IRB approved amendment to stop recruitment before PPE	3	0	0
PS_2697		78	M	Y	Other	Y	IRB approved amendment to stop recruitment before PPE	3	0	0
PS_2221		72	M	N	White	Y	Patient canceled surgery due to COVID but will reschedule	0	0	0
PS_2372		76	F	N	White	Y	Patient approached by conflicting study.	0	0	0
PS_2121		71	F	N	White	Y	Patient was unable to complete baseline because the patient was urgently admitted to the hospital before surgery.	0	3	0
PS_2408		73	M	Y	Other	Y	Patient deemed ineligible after approach. Patient's chart said he was fluent in English when he was in fact not, and only able to converse and discuss the study in Spanish, requiring a translator.	0	3	0
PS_2438		74	M	N	White	Y	Patient was a maybe, then surgery canceled.	0	3	0
PS_2590		63	M	N	White	Y	Patient said yes, but could not be reached for baseline.	0	3	0
PS_1955			M	N	White	N	Ineligible.	1	0	0					Not approached because ineligible
PS_1956			F	N	Asian	N	Ineligible.	1	0	0
PS_1960			M	N	White	N	Ineligible.	1	0	0
PS_1962			M	N	White	N	Ineligible.	1	0	0
PS_1963			M	N	White	N	Ineligible.	1	0	0
PS_1964			F	N	White	N	Ineligible.	1	0	0
PS_1966			F	N	White	N	Ineligible.	1	0	0
PS_1971		77	F	N	White	Y	Surgery canceled, and at time of Rescheduled surgery patient Ineligible.	1	0	0
PS_1973			M	N	White	N	Ineligible.	1	0	0
PS_1975			M	N	White	N	Ineligible.	1	0	0
PS_1976			M	N	White	N	Ineligible.	1	0	0
PS_1977			M	N	White	N	Ineligible.	1	0	0
PS_1978			F	N	White	N	Ineligible.	1	0	0
PS_1979			M	Unk	White	N	Ineligible.	1	0	0
PS_1980			F	N	White	N	Ineligible.	1	0	0
PS_1984			F	N	White	N	Ineligible.	1	0	0
PS_1985			M	Y	White	N	Ineligible.	1	0	0
PS_1990			M	N	White	N	Ineligible.	1	0	0
PS_1991			M	N	White	N	Ineligible.	1	0	0
PS_1992			M	N	Black or African American	N	Ineligible.	1	0	0
PS_1997			M	N	Black or African American	N	Ineligible.	1	0	0
PS_1998			F	N	White	N	Ineligible.	1	0	0
PS_1999			M	N	Asian	N	Ineligible.	1	0	0
PS_2000			M	Unk	Black or African American	N	Ineligible.	1	0	0
PS_2001			M	N	White	N	Ineligible.	1	0	0
PS_2003			F	Y	White	N	Ineligible.	1	0	0
PS_2008			F	N	White	N	Ineligible.	1	0	0
PS_2009			F	N	White	N	Ineligible.	1	0	0
PS_2011			F	N	White	N	Ineligible.	1	0	0
PS_2012			M	Unk	White	N	Ineligible.	1	0	0
PS_2014			F	N	White	N	Ineligible.	1	0	0
PS_2018			M	N	Black or African American	N	Ineligible.	1	0	0
PS_2020			F	Unk	White	N	Ineligible.	1	0	0
PS_2021			M	N	White	N	Ineligible.	1	0	0
PS_2025			F	N	White	N	Ineligible.	1	0	0
PS_2026			M	N	White	N	Ineligible.	1	0	0
PS_2033			M	N	Native Hawaiian or Other Pacific Islander	N	Ineligible.	1	0	0
PS_2034			F	N	White	N	Ineligible.	1	0	0
PS_2035			M	N	White	N	Ineligible.	1	0	0
PS_2036			M	N	Black or African American	N	Ineligible.	1	0	0
PS_2037			M	Y	Other	N	Ineligible.	1	0	0
PS_2038			M	N	White	N	Ineligible.	1	0	0
PS_2048			M	N	White	N	Ineligible.	1	0	0
PS_2049			M	N	White	N	Ineligible.	1	0	0
PS_2050			M	N	White	N	Ineligible.	1	0	0
PS_2051			F	N	Asian	N	Ineligible.	1	0	0
PS_2052			M	N	White	N	Ineligible.	1	0	0
PS_2053			F	N	White	N	Ineligible.	1	0	0
PS_2054			M	N	White	N	Ineligible.	1	0	0
PS_2055			F	N	White	N	Ineligible.	1	0	0
PS_2057			M	N	White	N	Ineligible.	1	0	0
PS_2058			F	N	White	N	Ineligible.	1	0	0
PS_2060			F	N	White	N	Ineligible.	1	0	0
PS_2061			F	N	White	N	Ineligible.	1	0	0
PS_2062			M	Y	Black or African American	N	Ineligible.	1	0	0
PS_2063			M	N	White	N	Ineligible.	1	0	0
PS_2064			F	Y	Black or African American	N	Ineligible.	1	0	0
PS_2069			M	N	White	N	Ineligible.	1	0	0
PS_2070			M	N	White	N	Ineligible.	1	0	0
PS_2071			M	Y	Other	N	Ineligible.	1	0	0
PS_2072			M	N	Asian	N	Ineligible.	1	0	0
PS_2073			M	N	White	N	Ineligible.	1	0	0
PS_2074			M	N	White	N	Ineligible.	1	0	0
PS_2084			M	N	White	N	Ineligible.	1	0	0
PS_2085			M	N	White	N	Ineligible.	1	0	0
PS_2086			M	Unk	White	N	Ineligible.	1	0	0
PS_2087			F	Y	White	N	Ineligible.	1	0	0
PS_2088			F	N	White	N	Ineligible.	1	0	0
PS_2101			M	N	White	N	Ineligible.	1	0	0
PS_2102			M	N	White	N	Ineligible.	1	0	0
PS_2108			M	Unk	White	N	Ineligible.	1	0	0
PS_2112			M	N	White	N	Ineligible.	1	0	0
PS_2113			F	N	White	N	Ineligible.	1	0	0
PS_2114			M	Unk	White	N	Ineligible.	1	0	0
PS_2115			F	N	White	N	Ineligible.	1	0	0
PS_2116			M	Unk	Unknown	N	Ineligible.	1	0	0
PS_2117			M	N	White	N	Ineligible.	1	0	0
PS_2118			F	N	White	N	Ineligible.	1	0	0
PS_2127			M	N	White	N	Ineligible.	1	0	0
PS_2128			F	N	White	N	Ineligible.	1	0	0
PS_2129			M	N	Asian	N	Ineligible.	1	0	0
PS_2130			F	Unk	Unknown	N	Ineligible.	1	0	0
PS_2133			M	N	White	N	Ineligible.	1	0	0
PS_2140			F	N	White	N	Ineligible.	1	0	0
PS_2141			F	N	White	N	Ineligible.	1	0	0
PS_2142			M	Y	White	N	Ineligible.	1	0	0
PS_2143			F	N	White	N	Ineligible.	1	0	0
PS_2144			F	N	White	N	Ineligible.	1	0	0
PS_2146			M	N	White	N	Ineligible.	1	0	0
PS_2150			M	N	Asian	N	Ineligible.	1	0	0
PS_2151			M	N	White	N	Ineligible.	1	0	0
PS_2152			F	N	White	N	Ineligible.	1	0	0
PS_2153			M	N	White	N	Ineligible.	1	0	0
PS_2157			F	Unk	Unknown	N	Ineligible.	1	0	0
PS_2158			F	N	White	N	Ineligible.	1	0	0
PS_2159			F	N	White	N	Ineligible.	1	0	0
PS_2166			M	N	White	N	Ineligible.	1	0	0
PS_2167			M	N	White	N	Ineligible.	1	0	0
PS_2168			M	N	White	N	Ineligible.	1	0	0
PS_2169			F	Unk	Other	N	Ineligible.	1	0	0
PS_2170			M	N	White	N	Ineligible.	1	0	0
PS_2171			M	N	White	N	Ineligible.	1	0	0
PS_2172			F	N	White	N	Ineligible.	1	0	0
PS_2175			F	N	White	N	Ineligible.	1	0	0
PS_2177			M	N	White	N	Ineligible.	1	0	0
PS_2178			M	N	White	N	Ineligible.	1	0	0
PS_2179			M	Y	Other	N	Ineligible.	1	0	0
PS_2180			M	N	Black or African American	N	Ineligible.	1	0	0
PS_2183			M	Y	White	N	Ineligible.	1	0	0
PS_2184			M	N	White	N	Ineligible.	1	0	0
PS_2185			M	N	White	N	Ineligible.	1	0	0
PS_2186			M	Unk	White	N	Ineligible.	1	0	0
PS_2187			F	N	White	N	Ineligible.	1	0	0
PS_2188			F	N	White	N	Ineligible.	1	0	0
PS_2189			M	N	Black or African American	N	Ineligible.	1	0	0
PS_2192			M	N	White	N	Ineligible.	1	0	0
PS_2199			M	Y	Unknown	N	Ineligible.	1	0	0
PS_2201			M	N	White	N	Ineligible.	1	0	0
PS_2203			F	N	White	N	Ineligible.	1	0	0
PS_2204			F	N	Asian	N	Ineligible.	1	0	0
PS_2205			M	N	White	N	Ineligible.	1	0	0
PS_2206			M	N	White	N	Ineligible.	1	0	0
PS_2212			M	N	Black or African American	N	Ineligible.	1	0	0
PS_2213			F	N	White	N	Ineligible.	1	0	0
PS_2214			M	N	Asian	N	Ineligible.	1	0	0
PS_2215			M	N	White	N	Ineligible.	1	0	0
PS_2216			M	N	White	N	Ineligible.	1	0	0
PS_2223			M	N	White	N	Ineligible.	1	0	0
PS_2225			M	N	White	N	Ineligible.	1	0	0
PS_2226			M	N	White	N	Ineligible.	1	0	0
PS_2227			M	N	White	N	Ineligible.	1	0	0
PS_2228			M	N	White	N	Ineligible.	1	0	0
PS_2230			F	N	White	N	Ineligible.	1	0	0
PS_2236			M	N	White	N	Ineligible.	1	0	0
PS_2237			M	N	Black or African American	N	Ineligible.	1	0	0
PS_2238			M	N	White	N	Ineligible.	1	0	0
PS_2242			M	N	White	N	Ineligible.	1	0	0
PS_2245			M	N	White	N	Ineligible.	1	0	0
PS_2246			M	N	Black or African American	N	Ineligible.	1	0	0
PS_2247			M	N	White	N	Ineligible.	1	0	0
PS_2248			M	N	White	N	Ineligible.	1	0	0
PS_2252			M	N	White	N	Ineligible.	1	0	0
PS_2253			F	Unk	White	N	Ineligible.	1	0	0
PS_2254			F	N	Black or African American	N	Ineligible.	1	0	0
PS_2255			M	N	White	N	Ineligible.	1	0	0
PS_2256			M	N	White	N	Ineligible.	1	0	0
PS_2258			M	N	White	N	Ineligible.	1	0	0
PS_2262			F	N	White	N	Ineligible.	1	0	0
PS_2264			M	N	White	N	Ineligible.	1	0	0
PS_2267			M	Y	White	N	Ineligible.	1	0	0
PS_2268			M	N	White	N	Ineligible.	1	0	0
PS_2269			F	N	White	N	Ineligible.	1	0	0
PS_2270			M	N	White	N	Ineligible.	1	0	0
PS_2271			M	N	White	N	Ineligible.	1	0	0
PS_2272			M	Y	White	N	Ineligible.	1	0	0
PS_2273			M	N	White	N	Ineligible.	1	0	0
PS_2274			F	N	Asian	N	Ineligible.	1	0	0
PS_2275			M	N	Asian	N	Ineligible.	1	0	0
PS_2276			M	N	White	N	Ineligible.	1	0	0
PS_2277			M	N	White	N	Ineligible.	1	0	0
PS_2286			F	N	White	N	Ineligible.	1	0	0
PS_2287			M	Unk	White	N	Ineligible.	1	0	0
PS_2288			F	N	White	N	Ineligible.	1	0	0
PS_2289			M	N	Black or African American	N	Ineligible.	1	0	0
PS_2290			M	N	White	N	Ineligible.	1	0	0
PS_2291			F	N	White	N	Ineligible.	1	0	0
PS_2299			M	Unk	White	N	Ineligible.	1	0	0
PS_2300			F	N	White	N	Ineligible.	1	0	0
PS_2301			F	N	White	N	Ineligible.	1	0	0
PS_2302			M	N	White	N	Ineligible.	1	0	0
PS_2305			F	N	Other	N	Ineligible.	1	0	0
PS_2307			F	N	White	N	Ineligible.	1	0	0
PS_2308			F	N	Black or African American	N	Ineligible.	1	0	0
PS_2309			M	N	White	N	Ineligible.	1	0	0
PS_2310			M	N	White	N	Ineligible.	1	0	0
PS_2312			F	Unk	White	N	Ineligible.	1	0	0
PS_2313			M	Unk	White	N	Ineligible.	1	0	0
PS_2314			M	N	White	N	Ineligible.	1	0	0
PS_2316			M	N	White	N	Ineligible.	1	0	0
PS_2323			F	N	White	N	Ineligible.	1	0	0
PS_2324			F	N	White	N	Ineligible.	1	0	0
PS_2325			F	N	White	N	Ineligible.	1	0	0
PS_2332			M	N	White	N	Ineligible.	1	0	0
PS_2333			M	N	White	N	Ineligible.	1	0	0
PS_2336			F	N	White	N	Ineligible.	1	0	0
PS_2337			M	N	Other	N	Ineligible.	1	0	0
PS_2338			F	N	White	N	Ineligible.	1	0	0
PS_2349			F	N	White	N	Ineligible.	1	0	0
PS_2350			F	N	White	N	Ineligible.	1	0	0
PS_2351			F	N	White	N	Ineligible.	1	0	0
PS_2352			F	N	White	N	Ineligible.	1	0	0
PS_2353			M	N	White	N	Ineligible.	1	0	0
PS_2354			M	N	White	N	Ineligible.	1	0	0
PS_2362			F	N	White	N	Ineligible	1	0	0
PS_2365			F	N	White	N	Ineligible.	1	0	0
PS_2366			M	N	Black or African American	N	Ineligible.	1	0	0
PS_2371			M	N	White	N	Ineligible.	1	0	0
PS_2375			F	N	White	N	Ineligible.	1	0	0
PS_2376			F	N	White	N	Ineligible.	1	0	0
PS_2380			M	Unk	White	N	Ineligible.	1	0	0
PS_2381			F	N	White	N	Ineligible.	1	0	0
PS_2383			M	Y	Other	N	Ineligible.	1	0	0
PS_2386			M	N	White	N	Ineligible.	1	0	0
PS_2387			M	N	Black or African American	N	Ineligible.	1	0	0
PS_2389			M	N	White	N	Ineligible.	1	0	0
PS_2391			M	N	White	N	Ineligible.	1	0	0
PS_2392			M	Unk	White	N	Ineligible.	1	0	0
PS_2397			F	N	White	N	Ineligible.	1	0	0
PS_2398			M	N	White	N	Ineligible.	1	0	0
PS_2400			M	Y	Unknown	N	Ineligible.	1	0	0
PS_2401			M	N	White	N	Ineligible.	1	0	0
PS_2404			M	Y	Other	N	Ineligible.	1	0	0					PRE-COVID			POST-COVID			POST-VACCINE
PS_2407			M	N	White	N	Ineligible.	1	0	0
PS_2412			F	N	White	N	Ineligible.	1	0	0
PS_2413			F	N	White	N	Ineligible.	1	0	0
PS_2414			F	Y	Black or African American	N	Ineligible.	1	0	0
PS_2415			N	M	White	N	Ineligible.	1	0	0
PS_2416			M	N	White	N	Ineligible.	1	0	0
PS_2417			F	N	White	N	Ineligible.	1	0	0
PS_2418			F	N	White	N	Ineligible.	1	0	0
PS_2423			M	N	White	N	Ineligible.	1	0	0
PS_2424			F	N	White	N	Ineligible.	1	0	0
PS_2425			M	N	White	N	Ineligible.	1	0	0
PS_2426			M	N	Other	N	Ineligible.	1	0	0
PS_2429			M	N	Asian	N	Ineligible.	1	0	0
PS_2433			M	N	White	N	Ineligible.	1	0	0
PS_2434			F	N	White	N	Ineligible.	1	0	0
PS_2440			F	Unk	White	N	Ineligible.	1	0	0
PS_2441			M	N	White	N	Ineligible.	1	0	0
PS_2442			M	N	White	N	Ineligible.	1	0	0
PS_2443			F	N	White	N	Ineligible.	1	0	0
PS_2446			M	N	White	N	Ineligible.	1	0	0
PS_2448			M	N	White	N	Ineligible.	1	0	0
PS_2455			F	N	White	N	Ineligible.	1	0	0
PS_2456			M	N	Unknown	N	Ineligible.	1	0	0
PS_2458			M	N	Black or African American	N	Ineligible.	1	0	0
PS_2459			F	Unk	Unknown	N	Ineligible.	1	0	0
PS_2460			F	N	White	N	Ineligible.	1	0	0
PS_2461			M	N	White	N	Ineligible.	1	0	0
PS_2470			M	N	White	N	Ineligible.	1	0	0
PS_2473			F	N	White	N	Ineligible.	1	0	0
PS_2474			F	N	White	N	Ineligible.	1	0	0
PS_2475			M	N	White	N	Ineligible.	1	0	0
PS_2476			M	N	White	N	Ineligible.	1	0	0
PS_2477			M	N	White	N	Ineligible.	1	0	0
PS_2478			M	N	White	N	Ineligible.	1	0	0
PS_2479			M	Y	Other	N	Ineligible.	1	0	0
PS_2480			M	N	White	N	Ineligible.	1	0	0
PS_2484			F	N	White	N	Ineligible.	1	0	0
PS_2486			F	Y	Other	N	Ineligible	1	0	0
PS_2498			M	N	White	N	Ineligible.	1	0	0
PS_2499			M	Unk	White	N	Ineligible.	1	0	0
PS_2500			F	N	White	N	Ineligible.	1	0	0
PS_2501			M	N	White	N	Ineligible.	1	0	0
PS_2502			F	N	White	N	Ineligible.	1	0	0
PS_2514			F	N	Asian	N	Ineligible.	1	0	0
PS_2515			F	N	White	N	Ineligible.	1	0	0
PS_2516			M	N	White	N	Ineligible.	1	0	0
PS_2517			M	N	White	N	Ineligible.	1	0	0
PS_2518			M	N	White	N	Ineligible.	1	0	0
PS_2527			M	N	White	N	Ineligible.	1	0	0
PS_2528			M	N	White	N	Ineligible.	1	0	0
PS_2529			M	Unk	White	N	Ineligible.	1	0	0
PS_2530			M	N	White	N	Ineligible.	1	0	0
PS_2531			M	N	White	N	Ineligible.	1	0	0
PS_2532			F	N	White	N	Ineligible.	1	0	0
PS_2538			M	N	White	N	Ineligible.	1	0	0
PS_2539			M	Y	Other	N	Ineligible.	1	0	0
PS_2540			F	Y	White	N	Ineligible.	1	0	0
PS_2543			M	N	Black or African American	N	Ineligible.	1	0	0
PS_2544			M	N	White	N	Ineligible.	1	0	0
PS_2545			F	N	Other	N	Ineligible.	1	0	0
PS_2546			F	N	White	N	Ineligible.	1	0	0
PS_2547			M	N	Black or African American	N	Ineligible.	1	0	0
PS_2548			M	Y	Other	N	Ineligible.	1	0	0
PS_2549			M	N	White	N	Ineligible.	1	0	0
PS_2550			F	Y	Black or African American	N	Ineligible.	1	0	0
PS_2555			M	N	White	N	Ineligible.	1	0	0
PS_2556			M	N	White	N	Ineligible.	1	0	0
PS_2557			M	N	White	N	Ineligible.	1	0	0
PS_2558			F	N	White	N	Ineligible.	1	0	0
PS_2560			M	Y	White	N	Ineligible.	1	0	0
PS_2564			M	N	Unknown	N	Ineligible.	1	0	0
PS_2565			M	N	White	N	Ineligible.	1	0	0
PS_2568			M	N	White	N	Ineligible.	1	0	0
PS_2570			M	N	White	N	Ineligible.	1	0	0
PS_2573			M	N	White	N	Ineligible.	1	0	0
PS_2574			M	Y	Unknown	N	Ineligible.	1	0	0
PS_2575			M	N	White	N	Ineligible.	1	0	0
PS_2576			F	N	White	N	Ineligible.	1	0	0
PS_2580			M	N	White	N	Ineligible.	1	0	0
PS_2581			M	N	White	N	Ineligible.	1	0	0
PS_2582			F	Y	White	N	Ineligible.	1	0	0
PS_2586			M	N	White	N	Ineligible.	1	0	0
PS_2587			M	N	White	N	Ineligible.	1	0	0
PS_2588			M	N	White	N	Ineligible.	1	0	0
PS_2593			F	N	White	N	Ineligible.	1	0	0
PS_2596			M	N	White	N	Ineligible.	1	0	0
PS_2597			F	Y	White	N	Ineligible.	1	0	0
PS_2599			M	N	White	N	Ineligible.	1	0	0
PS_2601			F	N	White	N	Ineligible.	1	0	0
PS_2607			M	N	White	N	Ineligible.	1	0	0
PS_2608			F	N	White	N	Ineligible.	1	0	0
PS_2612			M	N	White	N	Ineligible.	1	0	0
PS_2613			M	N	White	N	Ineligible.	1	0	0
PS_2615			F	N	White	N	Ineligible.	1	0	0
PS_2617			M	Y	Other	N	Ineligible.	1	0	0
PS_2619			F	N	White	N	Ineligible.	1	0	0
PS_2620			F	N	White	N	Ineligible.	1	0	0
PS_2622			M	N	White	N	Ineligible.	1	0	0
PS_2623			M	N	White	N	Ineligible.	1	0	0
PS_2624			M	N	White	N	Ineligible.	1	0	0
PS_2625			M	N	White	N	Ineligible.	1	0	0
PS_2627			F	N	White	N	Ineligible.	1	0	0
PS_2629			M	N	White	N	Ineligible.	1	0	0
PS_2630			F	N	Asian	N	Ineligible.	1	0	0
PS_2634			M	N	White	N	Ineligible.	1	0	0
PS_2640			F	N	White	N	Ineligible.	1	0	0
PS_2642			M	N	White	N	Ineligible.	1	0	0
PS_2643			M	N	White	N	Ineligible.	1	0	0
PS_2644			M	Y	Unknown	N	Ineligible.	1	0	0
PS_2647			M	N	White	N	Ineligible.	1	0	0
PS_2648			M	N	White	N	Ineligible.	1	0	0
PS_2649			F	N	White	N	Ineligible.	1	0	0
PS_2650			M	N	White	N	Ineligible.	1	0	0
PS_2651			F	N	White	N	Ineligible.	1	0	0
PS_2652			M	N	White	N	Ineligible.	1	0	0
PS_2660			F	N	White	N	Ineligible.	1	0	0
PS_2661			M	N	White	N	Ineligible.	1	0	0
PS_2662			M	N	Asian	N	Ineligible.	1	0	0
PS_2663			M	N	White	N	Ineligible.	1	0	0
PS_2664			M	N	White	N	Ineligible.	1	0	0
PS_2666			M	Y	Black or African American	N	Ineligible.	1	0	0
PS_2670			M	N	White	N	Ineligible.	1	0	0
PS_2671			F	Y	Other	N	Ineligible.	1	0	0
PS_2672			F	Unk	White	N	Ineligible.	1	0	0
PS_2675			F	N	White	N	Ineligible.	1	0	0
PS_2679			M	N	White	N	Ineligible.	1	0	0
PS_2682			M	N	White	N	Ineligible.	1	0	0
PS_2683			F	N	White	N	Ineligible.	1	0	0
PS_2684			F	N	White	N	Ineligible.	1	0	0
PS_2685			M	N	White	N	Ineligible.	1	0	0
PS_2692			M	N	White	N	Ineligible.	1	0	0
PS_2218		63	M	N	White	Y	Patient completed baseline and then discovered to be Ineligible. Not enrolled.	0	0	3
PS_2578		68	F	N	White	Y	Patient discovered to be ineligible after more information was added to her chart	0	0	3
PS_2600		60	M	N	White	Y	Patient was admitted prior to surgery and became ineligble. Not randomized.	0	0	3
PS_2603		66	M	N	White	Y	Patient completed basline, but became ineligible before surgery.	0	0	3

## Sheet: During COVID Approaches
PreScreen Subject #	Subject Study Number	Age	Sex	Ethnicity	Race	Met Eligibility Criteria (Y/N)	Reason for Exclusion/Screen Failure	Didn’t Approach: 1 - Ineligible, 2 - Approached by conflicting study, 3 - Other (left before could approach, PPE canceled, Surgery canceled, unable to approach due to corornavirus shutdown/covid exposure)	Said No: 1- No to participation (including when called for baseline), 2 - No to discussion, 3 - Other (maybe but unreachable, maybe but surgery canceled)	Said Yes: 1 - Participated, 2 - Yes and completed baseline but declined before or on DOS, 3 - Other (unrandomized, did not book open heart surgery at MGH, unreachable to complete baseline, coronavirus shutdown/covid exposure, surgery canceled after recruitment, enrolled in conflicting study, died before surgery)	Reason for Decline
PS_1957	MINDDS_CARD_293	65	M	N	White	Y		0	0	1					Consented to enrollment
PS_1968	MINDDS_CARD_295	68	F	N	White	Y		0	0	1
PS_1969	MINDDS_CARD_289	70	M	N	White	Y		0	0	1
PS_1970	MINDDS_CARD_291	72	M	N	White	Y		0	0	1
PS_1972	MINDDS_CARD_290	79	M	N	White	Y		0	0	1
PS_1981	MINDDS_CARD_292	67	M	N	White	Y		0	0	1
PS_1983	MINDDS_CARD_294	77	M	N	White	Y		0	0	1
PS_1986	MINDDS_CARD_300	60	M	N	White	Y		0	0	1
PS_1987	MINDDS_CARD_296	65	M	Unk	White	Y		0	0	1
PS_1993	MINDDS_NCARD_073	63	M	N	White	Y		0	0	1
PS_1994	MINDDS_CARD_298	73	F	N	White	Y		0	0	1
PS_1995	MINDDS_CARD_297	73	M	N	White	Y		0	0	1
PS_1996	MINDDS_NCARD_074	74	M	N	White	Y		0	0	1
PS_2002	MINDDS_CARD_299	60	F	N	White	Y		0	0	1
PS_2006	MINDDS_CARD_304	74	M	N	White	Y		0	0	1
PS_2010	MINDDS_CARD_301	68	M	N	White	Y		0	0	1
PS_2013	MINDDS_CARD_302	63	M	Unk	White	Y		0	0	1
PS_2023	MINDDS_CARD_303	61	F	N	White	Y		0	0	1
PS_2028	MINDDS_CARD_307	71	M	N	White	Y		0	0	1
PS_2030	MINDDS_CARD_306	73	M	N	White	Y		0	0	1
PS_2043	MINDDS_CARD_305	71	M	N	White	Y		0	0	1
PS_2045	MINDDS_NCARD_075	76	M	N	White	Y		0	0	1
PS_2066	MINDDS_CARD_309	67	M	N	White	Y		0	0	1
PS_2076	MINDDS_CARD_308	64	M	N	White	Y		0	0	1
PS_2077	MINDDS_CARD_312	64	M	N	Asian	Y		0	0	1
PS_2078	MINDDS_NCARD_077	65	M	N	White	Y		0	0	1
PS_2081	MINDDS_CARD_310	73	M	N	White	Y		0	0	1
PS_2083	MINDDS_NCARD_076	77	M	N	White	Y		0	0	1
PS_2089	MINDDS_CARD_314	60	M	N	White	Y		0	0	1
PS_2091	MINDDS_CARD_313	63	F	N	White	Y		0	0	1
PS_2094	MINDDS_CARD_311	68	M	N	White	Y		0	0	1
PS_2095	MINDDS_CARD_316	70	M	N	White	Y		0	0	1
PS_2105	MINDDS_CARD_317	62	M	N	White	Y		0	0	1
PS_2106	MINDDS_CARD_315	66	M	N	White	Y		0	0	1
PS_2119	MINDDS_CARD_318	67	M	N	White	Y		0	0	1
PS_2123	MINDDS_CARD_319	73	F	N	White	Y		0	0	1
PS_2125	MINDDS_CARD_320	79	M	N	White	Y	Surgery canceled after randomized. Will see if comes back for surgery.	0	0	1
PS_2131	MINDDS_NCARD_079	60	M	N	White	Y		0	0	1
PS_2132	MINDDS_CARD_321	61	M	N	White	Y		0	0	1
PS_2148	MINDDS_CARD_322	68	M	N	White	Y		0	0	1
PS_2154	MINDDS_NCARD_078	74	M	N	White	Y		0	0	1
PS_2162	MINDDS_CARD_324	69	M	N	White	Y		0	0	1
PS_2165	MINDDS_CARD_323	83	M	N	White	Y		0	0	1
PS_2194	MINDDS_CARD_330	69	F	N	White	Y		0	0	1
PS_2198	MINDDS_CARD_325	79	M	N	White	Y		0	0	1
PS_2202	MINDDS_NCARD_080	84	M	N	White	Y		0	0	1
PS_2208	MINDDS_CARD_335	75	M	Unk	Unknown	Y		0	0	1
PS_2211	MINDDS_NCARD_081	76	M	N	White	Y		0	0	1
PS_2217	MINDDS_CARD_328	62	M	N	White	Y		0	0	1
PS_2219	MINDDS_CARD_327	68	M	N	White	Y		0	0	1
PS_2220	MINDDS_CARD_326	71	M	N	White	Y		0	0	1
PS_2229	MINDDS_CARD_331	61	F	N	White	Y		0	0	1
PS_2233	MINDDS_CARD_329	69	F	N	White	Y		0	0	1
PS_2244	MINDDS_CARD_332	72	M	N	White	Y		0	0	1
PS_2257	MINDDS_CARD_338	60	M	N	White	Y		0	0	1
PS_2259	MINDDS_CARD_333	62	F	N	White	Y		0	0	1
PS_2266	MINDDS_CARD_334	72	M	N	White	Y		0	0	1
PS_2280	MINDDS_CARD_337	65	M	N	White	Y		0	0	1
PS_2294	MINDDS_CARD_341	64	M	N	White	Y		0	0	1
PS_2295	MINDDS_CARD_340	71	M	N	White	Y		0	0	1
PS_2296	MINDDS_CARD_336	72	M	N	White	Y		0	0	1
PS_2298	MINDDS_CARD_344	77	F	N	White	Y		0	0	1
PS_2304	MINDDS_CARD_339	63	F	N	White	Y		0	0	1
PS_2315	MINDDS_CARD_342	68	M	N	White	Y		0	0	1
PS_2317	MINDDS_CARD_345	69	F	N	White	Y		0	0	1
PS_2321	MINDDS_CARD_343	79	F	N	White	Y		0	0	1
PS_2327	MINDDS_NCARD_082	61	M	N	White	Y		0	0	1
PS_2328	MINDDS_CARD_348	62	F	Unk	Unknown	Y		0	0	1
PS_2331	MINDDS_CARD_349	68	M	N	White	Y		0	0	1
PS_2334	MINDDS_CARD_346	75	M	N	White	Y		0	0	1
PS_2341	MINDDS_CARD_350	65	M	N	White	Y		0	0	1
PS_2343	MINDDS_CARD_347	69	F	N	White	Y		0	0	1
PS_2357	MINDDS_CARD_355	66	M	N	White	Y		0	0	1
PS_2360	MINDDS_CARD_352	74	M	N	Asian	Y		0	0	1
PS_2368	MINDDS_CARD_354	63	F	Unk	White	Y		0	0	1
PS_2369	MINDDS_CARD_353	68	M	N	White	Y		0	0	1
PS_2370	MINDDS_CARD_356	71	M	N	White	Y		0	0	1
PS_2390	MINDDS_CARD_364	66	M	N	White	Y		0	0	1
PS_2399	MINDDS_CARD_357	62	M	N	White	Y		0	0	1
PS_2428	MINDDS_CARD_360	63	M	N	White	Y		0	0	1
PS_2430	MINDDS_CARD_359	65	M	N	White	Y		0	0	1
PS_2435	MINDDS_CARD_362	71	M	Unk	White	Y		0	0	1
PS_2436	MINDDS_CARD_358	73	M	N	White	Y		0	0	1
PS_2449	MINDDS_CARD_363	70	M	N	White	Y		0	0	1
PS_2451	MINDDS_CARD_365	72	F	N	White	Y		0	0	1
PS_2468	MINDDS_CARD_361	66	M	N	White	Y		0	0	1
PS_2471	MINDDS_CARD_373	74	M	N	White	Y		0	0	1
PS_2481	MINDDS_CARD_370	64	F	N	White	Y		0	0	1
PS_2489	MINDDS_CARD_366	66	M	N	White	Y		0	0	1
PS_2490	MINDDS_CARD_368	66	F	N	White	Y		0	0	1
PS_2492	MINDDS_CARD_367	70	M	N	White	Y		0	0	1
PS_2494	MINDDS_CARD_369	72	M	N	White	Y		0	0	1
PS_2503	MINDDS_NCARD_083	60	M	N	White	Y		0	0	1
PS_2512	MINDDS_NCARD_084	69	M	N	White	Y		0	0	1
PS_2519	MINDDS_CARD_375	60	F	N	White	Y		0	0	1
PS_2524	MINDDS_CARD_371	70	M	N	White	Y		0	0	1
PS_2525	MINDDS_CARD_372	72	F	N	White	Y		0	0	1
PS_2534	MINDDS_CARD_376	62	M	N	White	Y		0	0	1
PS_2535	MINDDS_CARD_374	63	M	N	White	Y		0	0	1
PS_2537	MINDDS_NCARD_085	65	M	N	White	Y		0	0	1
PS_2551	MINDDS_CARD_379	62	M	N	White	Y		0	0	1
PS_2552	MINDDS_CARD_377	70	M	Unk	White	Y		0	0	1
PS_2571	MINDDS_NCARD_086	75	M	N	White	Y		0	0	1
PS_2583	MINDDS_CARD_378	79	M	N	White	Y		0	0	1
PS_2589	MINDDS_CARD_380	62	M	N	White	Y		0	0	1
PS_2602	MINDDS_CARD_381	66	F	N	White	Y		0	0	1
PS_2635	MINDDS_CARD_382	64	M	N	White	Y		0	0	1
PS_2646	MINDDS_CARD_383	74	M	N	White	Y		0	0	1
PS_2107		66	M	N	White	Y	Patient completed baseline, but decided not to have surgery at MGH.	0	0	3
PS_2235		80	M	N	White	Y	Patient completed baseline, but not enrolled due to study team unavailabile as a result of covid exposure.	0	0	3
PS_2427		61	F	N	White	Y	Patient's surgery was canceled.	0	0	3
PS_2462		62	M	N	White	Y	Patient completed baseline but died before surgery.	0	0	3
PS_2482		68	F	N	White	Y	Patient's surgery was canceled.	0	0	3
PS_2491		67	M	N	White	Y	Patient's surgery was canceled.	0	0	3
PS_1958		68	M	N	White	Y	Patient declined study participation.	0	1	0					Refused
PS_1959		76	M	N	White	Y	Patient declined study participation.	0	1	0
PS_1961		68	F	N	White	Y	Patient declined study participation.	0	1	0
PS_1967		68	M	N	White	Y	Patient declined study participation.	0	1	0
PS_2004		69	M	N	White	Y	Patient declined study participation.	0	1	0
PS_2005		72	M	N	White	Y	Patient declined study participation.	0	1	0
PS_2007		74	M	N	White	Y	Patient declined study participation.	0	1	0
PS_2015		69	M	N	White	Y	Patient declined study participation.	0	1	0
PS_2016		70	M	N	White	Y	Patient declined study participation.	0	1	0
PS_2017		73	M	N	White	Y	Patient declined study participation.	0	1	0
PS_2019		81	M	N	White	Y	Patient declined study participation.	0	1	0
PS_2022		60	M	N	White	Y	Patient declined study participation.	0	1	0
PS_2027		71	F	N	White	Y	Patient declined study participation.	0	1	0
PS_2029		72	M	N	White	Y	Patient declined study participation.	0	1	0
PS_2032		80	M	N	White	Y	Patient declined study participation.	0	1	0
PS_2039		64	M	N	White	Y	Patient declined study participation.	0	1	0
PS_2040		64	F	N	White	Y	Patient declined study participation.	0	1	0
PS_2042		70	F	Unk	White	Y	Patient declined study participation.	0	1	0
PS_2047		79	M	N	White	Y	Patient declined study participation.	0	1	0
PS_2056		73	M	N	White	Y	Patient declined study participation.	0	1	0
PS_2075		64	F	N	White	Y	Patient declined study participation.	0	1	0
PS_2080		68	M	N	White	Y	Patient declined study participation.	0	1	0
PS_2082		73	F	N	White	Y	Patient declined study participation.	0	1	0
PS_2090		62	M	N	White	Y	Patient declined study participation.	0	1	0
PS_2092		63	M	N	White	Y	Patient declined study participation.	0	1	0
PS_2099		77	M	N	White	Y	Patient declined study participation.	0	1	0
PS_2103		60	M	N	White	Y	Patient declined study participation.	0	1	0
PS_2104		61	M	N	White	Y	Patient declined study participation.	0	1	0
PS_2111		76	F	Unk	White	Y	Patient declined study participation.	0	1	0
PS_2120		67	M	N	White	Y	Patient declined study particaption.	0	1	0
PS_2122		71	M	N	White	Y	Patient declined study participation.	0	1	0
PS_2124		77	M	N	White	Y	Patient declined study participation.	0	1	0
PS_2126		80	F	N	White	Y	Patient declined study participation.	0	1	0
PS_2134		65	F	N	White	Y	Patient declined study participation.	0	1	0
PS_2139		81	M	N	White	Y	Patient declined study participation.	0	1	0
PS_2145		60	M	N	White	Y	Patient declined study participation.	0	1	0
PS_2147		64	M	N	White	Y	Patient declined study participation.	0	1	0
PS_2149		69	F	N	White	Y	Patient declined study participation.	0	1	0
PS_2155		76	M	N	White	Y	Patient declined study participation.	0	1	0
PS_2161		66	M	N	White	Y	Patient declined study participation.	0	1	0
PS_2163		76	M	N	White	Y	Patient declined study participation.	0	1	0
PS_2176		73	M	N	White	Y	Patient declined study participation.	0	1	0
PS_2181		65	M	N	White	Y	Patient declined study participation.	0	1	0
PS_2190		60	M	Unk	White	Y	Patient declined study participation.	0	1	0
PS_2197		79	M	N	White	Y	Patient declined study participation.	0	1	0
PS_2231		62	F	N	White	Y	Patient declined study participation.	0	1	0
PS_2234		70	M	Unk	White	Y	Patient declined study participation.	0	1	0
PS_2249		69	F	N	White	Y	Patient declined study participation.	0	1	0
PS_2261		65	M	N	White	Y	Patient declined study participation.	0	1	0
PS_2263		69	F	N	White	Y	Patient declined study participation.	0	1	0
PS_2265		71	M	N	White	Y	Patient declined study participation.	0	1	0
PS_2281		66	F	N	White	Y	Patient declined study participation.	0	1	0
PS_2284		78	M	Unk	Unknown	Y	Patient declined study participation.	0	1	0
PS_2303		60	M	N	White	Y	Patient declined study participation.	0	1	0
PS_2320		78	M	N	White	Y	Patient declined study partcipation.	0	1	0
PS_2322		65	M	N	White	Y	Patient declined study participation.	0	1	0
PS_2330		64	M	Unk	White	Y	Patient declined study participation.	0	1	0
PS_2340		63	F	N	White	Y	Patient declined study participation.	0	1	0
PS_2342		69	F	N	Asian	Y	Patient declined	0	1	0
PS_2345		71	M	N	White	Y	Patient declined study participation.	0	1	0
PS_2348		81	M	N	White	Y	Patient declined study participation.	0	1	0
PS_2356		66	M	N	White	Y	Patient declined study participation.	0	1	0
PS_2361		76	F	N	White	Y	Patient declined study participation.	0	1	0
PS_2364		63	M	N	White	Y	Patient declined study participation.	0	1	0
PS_2367		61	F	Unk	Unknown	Y	Patient declined study participation	0	1	0
PS_2374		74	M	N	White	Y	Patient declined study participation.	0	1	0
PS_2378		63	M	Unk	White	Y	Patient declined study participation.	0	1	0
PS_2385		75	F	N	White	Y	Patient declined study participation.	0	1	0
PS_2393		63	F	N	White	Y	Patient declined study participation.	0	1	0
PS_2395		67	M	N	White	Y	Patient declined study participation.	0	1	0
PS_2403		81	M	N	White	Y	Patient declined study participation.	0	1	0
PS_2420		63	M	N	White	Y	Patient declined study participation.	0	1	0
PS_2432		67	F	N	White	Y	Patient declined study participation.	0	1	0
PS_2439		67	M	N	White	Y	Patient declined study participation.	0	1	0
PS_2445		63	M	N	White	Y	Patient declined study partcipation.	0	1	0
PS_2450		70	M	N	White	Y	Patient declined study participation.	0	1	0
PS_2453		79	M	N	White	Y	Patient declined study participation.	0	1	0
PS_2463		64	F	N	White	Y	Patient declined study participation.	0	1	0
PS_2465		66	F	N	White	Y	Patient declined study participation.	0	1	0
PS_2466		66	M	Unk	White	Y	Patient declined study participation.	0	1	0
PS_2472		64	F	Unk	White	Y	Patient declined study participation.	0	1	0
PS_2495		75	F	N	White	Y	Patient declined study partcipation.	0	1	0
PS_2497		84	F	N	Black or African American	Y	Patient declined study participation.	0	1	0
PS_2504		61	F	N	White	Y	Patient declined study participation.	0	1	0
PS_2505		62	M	N	White	Y	Patient declined study participation.	0	1	0
PS_2507		65	M	N	White	Y	Patient declined study participation when called for baseline.	0	1	0
PS_2521		63	M	N	White	Y	Patient declined study participation.	0	1	0
PS_2541		76	F	N	White	Y	Patient declined study participation.	0	1	0
PS_2553		78	M	N	White	Y	Patient declined study participation.	0	1	0
PS_2554		82	M	N	White	Y	Patient approached by conflicting study.	0	1	0
PS_2563		70	M	N	White	Y	Patient declined study participation.	0	1	0
PS_2566		73	F	N	White	Y	Patient declined study participation.	0	1	0
PS_2567		74	M	N	White	Y	Patient declined study participation.	0	1	0
PS_2569		80	F	N	White	Y	Patient declined study participation.	0	1	0
PS_2585		70	M	N	White	Y	Patient declined study participation.	0	1	0
PS_2605		70	M	N	White	Y	Patient declined study participation when called for baseline.	0	1	0
PS_2609		77	M	N	White	Y	Patient declined study partcipation.	0	1	0
PS_2614		63	M	N	White	Y	Patient declined study participation.	0	1	0
PS_2626		61	M	N	White	Y	Patient declined study participation.	0	1	0
PS_2632		76	F	N	White	Y	Patient declined study participation.	0	1	0
PS_2636		64	F	N	White	Y	Patient declined study participation.	0	1	0
PS_2641		86	F	Unk	White	Y	Patient declined study participation.	0	1	0
PS_2668		82	M	Unk	White	Y	Patient declined study participation.	0	1	0
PS_1965		63	F	N	White	Y	Patient declined study discussion.	0	2	0
PS_1974		72	F	N	White	Y	Patient declined study discussion.	0	2	0
PS_1982		67	M	N	White	Y	Patient declined study discussion.	0	2	0
PS_2024		62	M	N	White	Y	Patient declined study discussion.	0	2	0
PS_2031		73	M	N	White	Y	Patient declined study discussion.	0	2	0
PS_2044		74	F	Unk	White	Y	Patient declined study discussion.	0	2	0
PS_2067		73	F	Unk	White	Y	Patient declined study discussion.	0	2	0
PS_2068		75	M	N	White	Y	Patient declined study discussion.	0	2	0
PS_2098		81	F	N	White	Y	Patient declined study discussion.	0	2	0
PS_2100		65	F	N	White	Y	Patient declined study discussion.	0	2	0
PS_2135		70	F	N	Black or African American	Y	Patient declined study discussion.	0	2	0
PS_2174		69	M	N	Asian	Y	Patient declined study discussion.	0	2	0
PS_2182		66	M	N	White	Y	Patient declined study discussion.	0	2	0
PS_2293		63	F	N	Black or African American	Y	Patient declined study discussion.	0	2	0
PS_2405		62	F	N	White	Y	Patient declined study discussion.	0	2	0
PS_2411		80	F	N	White	Y	Patient approached by conflicting study and said no. Later approached by MINDDS, patient declined study discussion.	0	2	0
PS_2444		62	F	N	White	Y	Patient declined study discussion.	0	2	0
PS_2454		84	M	N	White	Y	Patient declined study discussion.	0	2	0
PS_2457		75	F	N	White	Y	Patient declined study discussion.	0	2	0
PS_2542		64	M	N	White	Y	Patient declined study discussion.	0	2	0
PS_2579		68	M	N	White	Y	Patient declined study discussion.	0	2	0
PS_2606		71	F	N	White	Y	Patient declined study discussion.	0	2	0
PS_2610		79	M	N	White	Y	Patient declined study discussion.	0	2	0
PS_2616		75	M	N	White	Y	Patient declined study discussion.	0	2	0
PS_2621		80	M	N	Black or African American	Y	Patient declined study discussion.	0	2	0
PS_2631		73	F	N	White	Y	Patient declined study participation.	0	2	0
PS_2633		76	M	N	White	Y	Patient declined study participation.	0	2	0
PS_2638		66	M	N	White	Y	Patient declined study discussion.	0	2	0
PS_1989		78	M	N	White	Y	Patient completed baseline, but declined study participation on DOS.	0	0	2
PS_2207		61	M	N	White	Y	Patient completed baseline, but Surgery canceled due to potential cancer. Surgery rescheduled and patient declined study participation.	0	0	2
PS_2224		82	M	N	White	Y	Patient declined study participation prior to DOS.	0	0	2
PS_2572		78	M	N	White	Y	Patient completed baseline and then called later to decline participation.	0	0	2
