# Supplementary material for: Patient hesitancy in perioperative clinical trial enrollment during the COVID-19 pandemic
Source: PLoS One. 2023 Jan 17;18(1):e0279643. doi: 10.1371/journal.pone.0279643 (PMC9844839; doi:10.1371/journal.pone.0279643)
Supplement: S3 Data — (XLSX) [file pone.0279643.s004.xlsx]

## Sheet: Before COVID-19 Enrollments
Patient Number	Age	Sex	Ethnicity	Race	ZCTA MAHI	ZCTA MEAL	ZCTA Unemployment Rate
1	59	M	Non-Hispanic	White	91191	3	4.18
2	67	M	Non-Hispanic	White	43808	1	5.8
3	65	M	Non-Hispanic	White	40769	1	6.02
4	81	M	Non-Hispanic	White	61798	4	4.08
5	70	M	Non-Hispanic	White	80417	4	1.65
6	67	M	Non-Hispanic	White	57987	2	8.44
7	64	M	Non-Hispanic	White	57207	2	8.32
8	42	M	Non-Hispanic	White	95037	3	5.41
9	74	M	Non-Hispanic	White	94375	3	1.61
10	65	M	Non-Hispanic	White	129085	4	3.36
11	72	M	Non-Hispanic	White	103228	2	3.9
12	59	M	Non-Hispanic	White	91964	2	3.19
13	60	M	Non-Hispanic	White	85432	3	4.97
14	81	F	Non-Hispanic	White	109529	4	4.6
15	71	M	Non-Hispanic	White	128613	4	3.11
16	54	M	Non-Hispanic	White	78750	2	5.05
17	50	F	Non-Hispanic	White	72821	2	4.93
18	48	M	Non-Hispanic	White	121458	4	3.27
19	60	M	Non-Hispanic	White	76250	2	4.67
20	61	M	Non-Hispanic	White	65708	2	3.9
21	66	M	Non-Hispanic	White	45992	2	5.09
22	56	M	Non-Hispanic	White	124130	4	2.21
23	81	F	Non-Hispanic	White	152240	4	2.77
24	43	M	Non-Hispanic	White	157353	4	3.93
25	65	M	Non-Hispanic	White	157353	4	3.93
26	56	F	Hispanic	White	83243	2	5.02
27	54	F	Non-Hispanic	White	185906	4	1.41
28	81	M	Non-Hispanic	White	151334	4	3.16
29	75	M	Non-Hispanic	White	151334	4	3.16
30	83	M	Non-Hispanic	White	151334	4	3.16
31	61	F	Non-Hispanic	White	151334	4	3.16
32	71	F	Non-Hispanic	White	151334	4	3.16
33	54	M	Non-Hispanic	White	151334	4	3.16
34	76	M	Non-Hispanic	White	151334	4	3.16
35	53	M	Non-Hispanic	White	106141	2	4.2
36	62	M	Non-Hispanic	White	66961	2	5.1
37	63	M	Non-Hispanic	White	128466	4	2.75
38	71	M	Non-Hispanic	White	76538	2	4.32
39	62	M	Non-Hispanic	White	76538	2	4.32
40	51	F	Hispanic	White	43411	1	9.77
41	50	M	Non-Hispanic	White	43411	1	9.77
42	79	F	Non-Hispanic	White	77484	2	5.97
43	73	M	Non-Hispanic	White	77484	2	5.97
44	71	M	Non-Hispanic	White	77484	2	5.97
45	62	M	Non-Hispanic	White	108070	4	3.77
46	70	F	Non-Hispanic	White	108070	4	3.77
47	52	M	Non-Hispanic	White	132948	4	3.14
48	68	M	Non-Hispanic	White	132948	4	3.14
49	66	M	Non-Hispanic	White	102934	2	3.57
50	73	F	Non-Hispanic	White	102934	2	3.57
51	74	M	Non-Hispanic	White	100693	4	3.03
52	53	F	Non-Hispanic	White	125922	3	3.19
53	64	M	Non-Hispanic	White	81788	2	6.53
54	73	F	Non-Hispanic	White	81788	2	6.53
55	66	M	Non-Hispanic	White	62927	1	3.53
56	80	F	Non-Hispanic	White	88630	2	4.96
57	63	M	Non-Hispanic	White	88630	2	4.96
58	49	M	Non-Hispanic	White	88630	2	4.96
59	51	M	Non-Hispanic	White	112761	4	3.29
60	62	M	Non-Hispanic	White	97778	4	2.53
61	52	M	Non-Hispanic	White	82468	3	3.64
62	73	M	Non-Hispanic	White	128083	4	2.93
63	63	M	Non-Hispanic	White	89250	3	3.65
64	65	M	Non-Hispanic	White	89250	3	3.65
65	67	F	Non-Hispanic	White	89250	3	3.65
66	41	M	Non-Hispanic	White	89250	3	3.65
67	83	M	Non-Hispanic	White	72574	2	4.36
68	64	M	Hispanic	White	119602	4	5.56
69	76	M	Non-Hispanic	White	119602	4	5.56
70	64	F	Non-Hispanic	White	119602	4	5.56
71	59	M	Non-Hispanic	White	119602	4	5.56
72	77	M	Non-Hispanic	White	148854	4	3.36
73	69	M	Non-Hispanic	White	148854	4	3.36
74	72	F	Non-Hispanic	White	123333	4	4.85
75	68	M	Non-Hispanic	White	109839	4	3.53
76	70	M	Non-Hispanic	White	95345	4	5.1
77	71	M	Non-Hispanic	White	81626	2	3.24
78	56	M	Non-Hispanic	White	73290	2	3.91
79	57	M	Non-Hispanic	White	73290	2	3.91
80	72	M	Non-Hispanic	White	73290	2	3.91
81	54	M	Non-Hispanic	White	73290	2	3.91
82	73	M	Non-Hispanic	White	68860	2	4.01
83	84	M	Non-Hispanic	White	68860	2	4.01
84	80	F	Non-Hispanic	White	68860	2	4.01
85	65	M	Non-Hispanic	White	68860	2	4.01
86	68	F	Non-Hispanic	White	127813	4	1.64
87	77	M	Non-Hispanic	White	127813	4	1.64
88	60	M	Non-Hispanic	White	105919	4	3.94
89	69	M	Non-Hispanic	White	105919	4	3.94
90	59	F	Non-Hispanic	White	122607	4	4.12
91	73	M	Non-Hispanic	White	122607	4	4.12
92	76	M	Non-Hispanic	White	142435	4	3.54
93	59	M	Non-Hispanic	White	160963	4	2.68
94	58	M	Non-Hispanic	White	157987	4	3.38
95	52	M	Non-Hispanic	White	90133	3	3.01
96	69	M	Non-Hispanic	White	130893	4	2.91
97	71	M	Non-Hispanic	White	160329	4	4.83
98	78	M	Non-Hispanic	White	110280	4	3.93
99	49	M	Non-Hispanic	White	109149	4	3.93
100	56	M	Non-Hispanic	White	60579	1	5.31
101	57	M	Non-Hispanic	White	103337	4	4.43
102	51	M	Non-Hispanic	White	105061	4	3.79
103	62	M	Non-Hispanic	White	103738	4	5.09
104	65	M	Non-Hispanic	White	113958	4	3.28
105	71	F	Non-Hispanic	White	65975	2	5
106	81	M	Non-Hispanic	White	65975	2	5
107	51	M	Non-Hispanic	White	65528	1	5.24
108	67	M	Non-Hispanic	White	56737	1	4.72
109	78	M	Non-Hispanic	White	74069	2	3.59
110	57	M	Non-Hispanic	White	74069	2	3.59
111	76	M	Non-Hispanic	White	96486	4	2.78
112	64	M	Non-Hispanic	Black	96486	4	2.78
113	82	M	Non-Hispanic	White	72537	3	5.62
114	59	M	Non-Hispanic	White	72537	3	5.62
115	64	M	Non-Hispanic	White	101549	3	3.13
116	73	M	Non-Hispanic	White	101549	3	3.13
117	81	M	Non-Hispanic	White	133718	4	3.57
118	64	M	Non-Hispanic	White	133718	4	3.57
119	61	F	Non-Hispanic	White	95563	3	3.87
120	79	F	Non-Hispanic	White	70191	1	8.15
121	75	M	Non-Hispanic	White	128173	4	4.32
122	59	M	Non-Hispanic	White	128173	4	4.32
123	76	F	Non-Hispanic	White	90528	2	4.22
124	73	F	Non-Hispanic	White	90279	2	4.26
125	71	M	Non-Hispanic	White	90279	2	4.26
126	71	M	Non-Hispanic	White	96104	3	4.55
127	50	M	Non-Hispanic	White	97404	2	3.89
128	62	M	Non-Hispanic	White	86570	2	3.74
129	54	M	Non-Hispanic	White	86570	2	3.74
130	65	M	Non-Hispanic	White	195494	5	2.91
131	79	M	Non-Hispanic	White	132688	5	2.99
132	52	M	Non-Hispanic	White	132688	5	2.99
133	73	M	Non-Hispanic	White	90755	4	3.68
134	86	M	Non-Hispanic	Asian	195336	5	1.73
135	66	M	Non-Hispanic	White	195336	5	1.73
136	59	F	Non-Hispanic	White	195336	5	1.73
137	58	F	Non-Hispanic	Asian	122098	4	1.95
138	52	F	Non-Hispanic	Asian	157563	4	2.22
139	71	M	Non-Hispanic	White	157563	4	2.22
140	72	M	Non-Hispanic	White	241190	5	2.69
141	73	M	Non-Hispanic	White	241190	5	2.69
142	74	M	Non-Hispanic	White	129309	5	4.01
143	65	M	Non-Hispanic	White	168361	4	3.35
144	56	M	Non-Hispanic	White	168542	4	3.5
145	63	M	Non-Hispanic	Asian	168542	4	3.5
146	67	M	Non-Hispanic	White	207702	4	4
147	69	M	Non-Hispanic	White	78902	2	3.25
148	72	M	Non-Hispanic	White	99444	5	3.13
149	74	F	Non-Hispanic	White	107683	4	2.84
150	68	M	Non-Hispanic	White	107683	4	2.84
151	54	M	Non-Hispanic	White	73491	2	2.85
152	69	M	Non-Hispanic	White	51456	2	4.51
153	56	M	Non-Hispanic	White	51456	2	4.51
154	66	F	Non-Hispanic	White	83632	4	5.46
155	65	M	Non-Hispanic	White	83632	4	5.46
156	75	M	Non-Hispanic	White	71981	4	4.79
157	80	M	Non-Hispanic	White	60432	2	4.23
158	58	M	Non-Hispanic	White	60432	2	4.23
159	71	M	Non-Hispanic	White	94360	3	4.97
160	62	M	Non-Hispanic	White	94360	3	4.97
161	67	M	Non-Hispanic	White	96066	3	5.83
162	64	M	Non-Hispanic	White	86637	2	4.65
163	76	M	Non-Hispanic	White	119688	3	2.71
164	72	F	Non-Hispanic	White	111110	4	4.54
165	51	F	Non-Hispanic	White	66805	4	5.27
166	54	F	Non-Hispanic	White	96004	3	4.96
167	75	F	Non-Hispanic	White	64833	2	5.02
168	58	M	Non-Hispanic	White	77783	2	4.18
169	66	F	Non-Hispanic	White	139421	4	4
170	71	M	Non-Hispanic	White	75792	2	5.56
171	60	F	Non-Hispanic	White	75792	2	5.56
172	68	M	Non-Hispanic	White	90173	2	3.51
173	66	M	Non-Hispanic	White	109254	3	2.98
174	73	M	Non-Hispanic	White	51979	2	4.09
175	59	F	Non-Hispanic	White	94935	3	4.27
176	56	F	Non-Hispanic	Black	135021	4	3.46
177	50	M	Non-Hispanic	White	52860	1	4.03
178	57	M	Non-Hispanic	White	57771	2	3.3
179	57	M	Non-Hispanic	White	75420	2	2.92
180	69	M	Non-Hispanic	White	75938	3	0.78
181	69	M	Non-Hispanic	White	76500	2	3.47
182	82	M	Non-Hispanic	White	94018	3	7.73
183	83	M	Non-Hispanic	White	81995	4	5.66
184	75	M	Non-Hispanic	White	88498	3	3.72
185	72	M	Non-Hispanic	White	59541	2	2.45
186	72	F	Non-Hispanic	White	115417	4	1.44
187	61	M	Non-Hispanic	White	115417	4	1.44
188	84	M	Non-Hispanic	White	85585	3	2.67
189	71	M	Non-Hispanic	White	134425	4	0.79
190	72	M	Non-Hispanic	White	81658	4	0
191	66	M	Non-Hispanic	Black	64340	2	4.01
192	73	M	Non-Hispanic	White	60898	3	2.53
193	65	F	Non-Hispanic	White	88262	3	2.55
194	66	M	Non-Hispanic	White	65731	1	2.48
195	69	M	Non-Hispanic	White	75517	3	7.49
196	56	M	Non-Hispanic	White	80286	3	3.11
197	56	F	Non-Hispanic	White	63152	2	2.6
198	74	M	Non-Hispanic	White	47556	2	6.02
199	59	M	Non-Hispanic	White	84717	4	2.68
200	66	F	Non-Hispanic	White	105328	3	4.91
201	80	M	Non-Hispanic	White	55033	2	7.32
202	71	M	Non-Hispanic	White	104863	2	5
203	69	F	Non-Hispanic	White	95900	2	6.91
204	62	M	Non-Hispanic	Asian	157610	4	3.04
205	52	M	Non-Hispanic	White	109205	3	3.72
206	57	M	Non-Hispanic	White	140260	4	4.33
207	63	M	Non-Hispanic	White	79883	4	3.33
208	41	M	Non-Hispanic	White	77740	3	3.58
209	63	F	Non-Hispanic	White	85351	4	4.01
210	55	M	Non-Hispanic	White	91460	2	3.38
211	74	M	Non-Hispanic	White	148955	4	3.07
212	50	M	Non-Hispanic	White	43494	2	8.18
213	58	F	Non-Hispanic	White	36668	1	13.61
214	69	M	Non-Hispanic	White	52092	2	9.73
215	68	M	Non-Hispanic	White	N/A	N/A	N/A

## Sheet: Before COVID-19 Refusals
Patient Number	Age	Sex	Ethnicity	Race	ZCTA MAHI	ZCTA MEAL	ZCTA Unemployment Rate
1	82	F	Non-Hispanic	White	91646	2	7.58
2	54	M	Non-Hispanic	White	75179	4	3.24
3	75	F	Non-Hispanic	White	65741	1	11.33
4	67	F	Non-Hispanic	White	68042	2	4.32
5	78	M	N/A	White	53053	2	5.62
6	76	F	Non-Hispanic	White	57987	2	8.44
7	59	M	Non-Hispanic	White	49679	2	3.89
8	62	F	Non-Hispanic	White	91734	2	4.4
9	71	M	Non-Hispanic	N/A	101111	2	5.77
10	67	F	Non-Hispanic	White	77184	2	4.14
11	73	M	Non-Hispanic	White	62281	2	7.01
12	78	F	Non-Hispanic	White	104710	2	1.87
13	70	F	Non-Hispanic	White	65708	2	3.9
14	70	F	Non-Hispanic	White	111209	4	3.53
15	81	F	Non-Hispanic	White	135340	4	3.9
16	69	M	Non-Hispanic	White	185906	4	1.41
17	52	M	Non-Hispanic	White	90969	3	3
18	76	F	Non-Hispanic	White	118721	4	2.83
19	62	M	Non-Hispanic	White	90000	2	4.13
20	65	M	Non-Hispanic	White	66961	2	5.1
21	70	F	Hispanic	N/A	128466	4	2.75
22	59	M	N/A	N/A	76538	2	4.32
23	74	M	Non-Hispanic	White	43411	1	9.77
24	59	M	N/A	White	56680	1	7.93
25	50	M	Non-Hispanic	White	77484	2	5.97
26	75	F	Non-Hispanic	White	108070	4	3.77
27	65	M	Non-Hispanic	N/A	100693	4	3.03
28	73	M	Non-Hispanic	White	144917	4	3.04
29	74	M	Non-Hispanic	White	46224	1	6.92
30	79	M	Non-Hispanic	White	81788	2	6.53
31	69	M	N/A	White	62927	1	3.53
32	66	F	Non-Hispanic	White	88630	2	4.96
33	49	M	Non-Hispanic	White	112761	4	3.29
34	82	M	Non-Hispanic	White	97778	4	2.53
35	52	M	Non-Hispanic	White	128083	4	2.93
36	67	M	Non-Hispanic	White	89250	3	3.65
37	61	M	Non-Hispanic	White	72574	2	4.36
38	63	F	Non-Hispanic	Black	123333	4	4.85
39	55	M	Non-Hispanic	White	125204	2	5.12
40	54	F	Non-Hispanic	Asian	73290	2	3.91
41	63	M	Non-Hispanic	White	68860	2	4.01
42	64	F	Hispanic	White	127813	4	1.64
43	52	M	Hispanic	N/A	105919	4	3.94
44	56	M	N/A	White	100680	4	3.66
45	60	M	Non-Hispanic	White	160963	4	2.68
46	79	M	Non-Hispanic	White	130893	4	2.91
47	65	M	Non-Hispanic	White	96563	4	2.72
48	71	F	Non-Hispanic	White	58105	2	7.68
49	59	F	Non-Hispanic	White	109149	4	3.93
50	71	F	Non-Hispanic	White	78416	4	3.51
51	73	F	Non-Hispanic	White	105065	5	4.41
52	80	F	Non-Hispanic	Black	98374	4	3.08
53	73	M	Non-Hispanic	Asian	65528	1	5.24
54	75	F	Non-Hispanic	White	56737	1	4.72
55	60	F	Non-Hispanic	White	74069	2	3.59
56	47	M	Non-Hispanic	White	106955	4	2.85
57	61	F	Non-Hispanic	White	101549	3	3.13
58	59	M	Non-Hispanic	White	96522	3	3.52
59	53	M	N/A	White	133718	4	3.57
60	72	M	Non-Hispanic	White	70191	1	8.15
61	52	M	Non-Hispanic	White	95675	2	6.13
62	78	M	Non-Hispanic	White	70959	2	4.07
63	69	F	Non-Hispanic	White	90279	2	4.26
64	61	M	Non-Hispanic	Asian	82902	2	6.35
65	55	M	Non-Hispanic	White	195336	5	1.73
66	59	M	Non-Hispanic	White	157563	4	2.22
67	43	M	Non-Hispanic	White	132399	5	3.38
68	63	M	Non-Hispanic	White	101397	4	3.51
69	71	M	Non-Hispanic	White	207702	4	4
70	64	F	Non-Hispanic	White	75294	2	2.51
71	59	F	Non-Hispanic	White	101216	2	2.78
72	66	M	Non-Hispanic	White	94360	3	4.97
73	55	M	Non-Hispanic	White	82963	2	4.69
74	76	F	N/A	N/A	87326	3	4.77
75	54	M	Non-Hispanic	White	90558	2	3.35
76	81	M	Non-Hispanic	White	79725	2	2.37
77	81	F	Non-Hispanic	White	103459	3	5.1
78	55	M	Non-Hispanic	White	58546	2	6.61
79	68	F	Non-Hispanic	White	102392	4	2.02
80	62	M	N/A	White	75295	2	6.1
81	54	M	Non-Hispanic	White	44269	2	5.54
82	65	F	Non-Hispanic	White	85270	4	4.21
83	72	M	Non-Hispanic	White	112500	3	4.33
84	64	M	Non-Hispanic	White	106957	3	3.76
85	76	M	Non-Hispanic	White	58115	1	6.19
86	56	M	Non-Hispanic	White	135021	4	3.46
87	71	M	Non-Hispanic	White	83594	2	4.17
88	66	M	Non-Hispanic	White	89097	2	6.95
89	70	M	Non-Hispanic	Asian	85000	4	2.04
90	72	F	Non-Hispanic	White	89595	3	3.57
91	66	M	Non-Hispanic	White	61157	3	2.44
92	82	M	N/A	White	86563	4	4.61
93	72	F	Non-Hispanic	White	106190	4	5.32
94	81	F	Non-Hispanic	White	44523	2	4.56
95	56	M	Non-Hispanic	Asian	44523	2	4.56
96	47	M	Non-Hispanic	N/A	46250	2	1.13
97	60	M	Non-Hispanic	White	46250	2	1.13
98	67	F	Non-Hispanic	White	41406	1	5.8
99	73	F	Non-Hispanic	White	41406	1	5.8
100	68	M	Non-Hispanic	Asian	47500	1	7.47
101	82	F	Hispanic	White	47500	1	7.47
102	60	M	Non-Hispanic	White	47500	1	7.47
103	61	M	Non-Hispanic	Asian	87328	4	0
104	65	M	Non-Hispanic	White	87328	4	0
105	56	M	Non-Hispanic	White	69306	2	3.87
106	67	M	Non-Hispanic	White	69306	2	3.87
107	55	M	Non-Hispanic	White	69306	2	3.87
108	72	M	Non-Hispanic	White	69306	2	3.87
109	53	F	Non-Hispanic	White	63357	2	5.38
110	83	M	Non-Hispanic	White	63357	2	5.38
111	69	F	Non-Hispanic	White	63357	2	5.38
112	78	M	Non-Hispanic	White	63357	2	5.38
113	66	M	Non-Hispanic	White	63357	2	5.38
114	70	M	Non-Hispanic	White	63357	2	5.38
115	59	F	Non-Hispanic	White	84828	4	3.5
116	81	M	Non-Hispanic	White	84828	4	3.5
117	76	M	Non-Hispanic	White	88611	4	6.91
118	78	M	Non-Hispanic	White	88611	4	6.91
119	80	F	Non-Hispanic	N/A	88611	4	6.91
120	80	M	Hispanic	White	113798	4	5.43
121	67	M	Non-Hispanic	White	113798	4	5.43
122	77	M	Non-Hispanic	White	113798	4	5.43
123	74	M	Non-Hispanic	Asian	63774	4	5.8
124	60	M	Non-Hispanic	White	63774	4	5.8
125	46	M	N/A	N/A	57365	2	4.14
126	74	F	Non-Hispanic	White	57365	2	4.14
127	71	F	Non-Hispanic	White	92000	3	2.74
128	72	M	Non-Hispanic	White	92000	3	2.74
129	N/A	N/A	N/A	N/A	N/A	N/A	N/A
130	N/A	N/A	N/A	N/A	N/A	N/A	N/A
131	N/A	N/A	N/A	N/A	N/A	N/A	N/A
132	N/A	N/A	N/A	N/A	N/A	N/A	N/A
133	N/A	N/A	N/A	N/A	N/A	N/A	N/A
134	N/A	N/A	N/A	N/A	N/A	N/A	N/A
135	N/A	N/A	N/A	N/A	N/A	N/A	N/A
136	N/A	N/A	N/A	N/A	N/A	N/A	N/A
137	N/A	N/A	N/A	N/A	N/A	N/A	N/A
138	N/A	N/A	N/A	N/A	N/A	N/A	N/A
139	N/A	N/A	N/A	N/A	N/A	N/A	N/A
140	N/A	N/A	N/A	N/A	N/A	N/A	N/A
141	N/A	N/A	N/A	N/A	N/A	N/A	N/A
142	N/A	N/A	N/A	N/A	N/A	N/A	N/A
143	N/A	N/A	N/A	N/A	N/A	N/A	N/A
144	N/A	N/A	N/A	N/A	N/A	N/A	N/A
145	N/A	N/A	N/A	N/A	N/A	N/A	N/A
146	N/A	N/A	N/A	N/A	N/A	N/A	N/A
147	N/A	N/A	N/A	N/A	N/A	N/A	N/A
148	N/A	N/A	N/A	N/A	N/A	N/A	N/A
149	N/A	N/A	N/A	N/A	N/A	N/A	N/A
150	N/A	N/A	N/A	N/A	N/A	N/A	N/A
151	N/A	N/A	N/A	N/A	N/A	N/A	N/A
152	N/A	N/A	N/A	N/A	N/A	N/A	N/A
153	N/A	N/A	N/A	N/A	N/A	N/A	N/A
154	N/A	N/A	N/A	N/A	N/A	N/A	N/A
155	N/A	N/A	N/A	N/A	N/A	N/A	N/A

## Sheet: During COVID-19 Enrollments
Patient Number	Age	Sex	Ethnicity	Race	ZCTA MAHI	ZCTA MEAL	ZCTA Unemployment Rate
1	59	F	Non-Hispanic	White	68393	4	3.7
2	50	M	Non-Hispanic	White	85432	3	4.97
3	63	M	Non-Hispanic	White	62281	2	7.01
4	71	F	Non-Hispanic	White	64942	3	3.31
5	57	M	Non-Hispanic	White	64942	3	3.31
6	76	F	Non-Hispanic	White	65154	2	6.23
7	73	M	Non-Hispanic	White	151334	4	3.16
8	69	F	Non-Hispanic	White	90000	2	4.13
9	71	M	Non-Hispanic	White	65224	2	5.88
10	50	F	Non-Hispanic	White	43411	1	9.77
11	55	M	Non-Hispanic	White	132948	4	3.14
12	67	F	Non-Hispanic	White	128083	4	2.93
13	66	F	Non-Hispanic	White	93212	4	4.21
14	69	F	Non-Hispanic	White	73290	2	3.91
15	69	M	Non-Hispanic	White	68860	2	4.01
16	78	M	Non-Hispanic	White	83208	3	3.65
17	50	M	Non-Hispanic	White	62605	1	5.39
18	59	M	Non-Hispanic	White	74069	2	3.59
19	42	M	Non-Hispanic	Black	95563	3	3.87
20	63	M	Non-Hispanic	White	128173	4	4.32
21	66	M	Non-Hispanic	White	90279	2	4.26
22	80	F	Non-Hispanic	White	195494	5	2.91
23	65	M	Non-Hispanic	White	70068	2	3.05
24	73	M	Non-Hispanic	White	75286	3	2.9
25	73	M	Non-Hispanic	White	83625	4	3.84
26	62	M	Non-Hispanic	White	39942	1	9.45
27	65	M	Non-Hispanic	White	79235	2	4.23
28	54	M	Non-Hispanic	White	57461	2	5.51
29	53	M	Non-Hispanic	White	74500	2	4.63
30	45	M	Non-Hispanic	White	52174	2	4.24
31	70	M	Non-Hispanic	White	45341	2	4.1
32	70	M	Non-Hispanic	White	45341	2	4.1
33	78	M	Non-Hispanic	White	87091	2	7.03
34	76	F	Non-Hispanic	White	68375	2	2.37
35	73	M	Non-Hispanic	White	76030	3	3.05
36	66	F	Non-Hispanic	White	92266	3	1.92

## Sheet: During COVID-19 Refusals
Patient Number	Age	Sex	Ethnicity	Race	ZCTA MAHI	ZCTA MEAL	ZCTA Unemployment Rate
1	73	M	Non-Hispanic	White	73458	1	4.52
2	77	F	Non-Hispanic	White	56637	2	5.98
3	76	M	Non-Hispanic	White	57207	2	8.32
4	59	F	Non-Hispanic	White	51270	1	8.81
5	45	M	N/A	White	51270	1	8.81
6	69	M	Non-Hispanic	White	62281	2	7.01
7	72	M	Non-Hispanic	White	64942	3	3.31
8	79	F	Non-Hispanic	White	90969	3	3
9	46	M	Non-Hispanic	Asian	106141	2	4.2
10	62	M	Non-Hispanic	White	65224	2	5.88
11	56	M	Non-Hispanic	White	65224	2	5.88
12	55	M	Non-Hispanic	Black	77484	2	5.97
13	71	M	Non-Hispanic	White	77484	2	5.97
14	63	F	Non-Hispanic	White	77484	2	5.97
15	78	M	Non-Hispanic	White	108070	4	3.77
16	48	M	Non-Hispanic	White	132948	4	3.14
17	75	M	Non-Hispanic	White	102934	2	3.57
18	47	M	Non-Hispanic	White	100693	4	3.03
19	75	M	Hispanic	White	62927	1	3.53
20	76	M	Non-Hispanic	White	89250	3	3.65
21	53	F	Hispanic	Black	89250	3	3.65
22	68	M	Non-Hispanic	White	109839	4	3.53
23	82	M	Non-Hispanic	White	85208	4	3.96
24	69	M	Non-Hispanic	White	68860	2	4.01
25	62	M	Non-Hispanic	White	155474	4	2.02
26	65	M	Non-Hispanic	White	88476	3	6.75
27	58	M	Non-Hispanic	White	160963	4	2.68
28	69	M	Non-Hispanic	Asian	110280	4	3.93
29	63	M	Non-Hispanic	N/A	110280	4	3.93
30	74	M	Non-Hispanic	White	62605	1	5.39
31	80	F	Non-Hispanic	White	133718	4	3.57
32	80	F	Non-Hispanic	White	133718	4	3.57
33	76	F	Non-Hispanic	White	117137	4	4.51
34	53	F	Non-Hispanic	White	112150	4	3.37
35	51	F	Non-Hispanic	White	78603	4	3.28
36	65	M	Non-Hispanic	White	96645	4	5.65
37	64	M	Non-Hispanic	White	51456	2	4.51
38	51	F	N/A	White	61694	2	4.51
39	75	M	N/A	N/A	82963	2	4.69
40	54	M	Non-Hispanic	White	68258	1	4.13
41	71	F	Non-Hispanic	White	83516	2	3.3
42	80	M	Non-Hispanic	White	94935	3	4.27
43	73	M	Non-Hispanic	White	88188	3	2.78
44	71	F	Non-Hispanic	White	56872	2	5.05
45	69	F	N/A	White	106094	4	0
46	59	M	Non-Hispanic	White	78689	4	2.34
47	71	M	Non-Hispanic	N/A	44375	4	3.92
48	66	M	Non-Hispanic	White	85811	3	4.02
